# Supplementary material for: Impact of Storage Conditions on the Breast Milk Peptidome
Source: Nutrients. 2020 Sep 8;12(9):2733. doi: 10.3390/nu12092733 (PMC7551425; doi:10.3390/nu12092733)
Supplement: Supplementary file 1 [file nutrients-12-02733-s001.pdf]

| Quantified modified peptide sequence              | Protein ID | A_−80oC | A_−20oC_120h | A_4oC_6h | A_RT_6h | A_RT_24h | B_−80oC | B_−20oC_120h | B_4oC_6h | B_RT_6h | B_RT_24h | C_−80oC | C_−20oC_120h | C_4oC_6h | C_RT_6h | C_RT_24h | D_−80oC | D_−20oC_120h | D_4oC_6h | D_RT_6h | D_RT_24h |       |
|---------------------------------------------------|------------|---------|--------------|----------|---------|----------|---------|--------------|----------|---------|----------|---------|--------------|----------|---------|----------|---------|--------------|----------|---------|----------|-------|
| [A].GPAGAAPAPGLGAAAAAPGALVRDVHS.[L]_              | Q8NES3     |         |              |          |         |          |         |              |          |         |          |         |              |          |         |          |         | 30185        | 18028    | 11306   |          |       |
| [A].GVVHGAIGGAGVTA.[L]_                           | P20138     |         |              |          |         |          |         |              |          |         |          |         |              |          |         |          |         |              | 30264    | 23354   | 29694    | 11400 |
| [A].HENYEKNNVML.[Q]_                              | P47710     |         |              |          |         |          |         |              |          |         |          |         |              |          |         | 25812    | 55077   |              | 26814    |         |          | 45552 |
| [A].HPHLFLYEDSK.[S]_                              | Q13410     |         |              |          |         |          |         | 23154        |          | 47720   | 10748    |         |              |          |         |          |         |              |          |         |          |       |
| [A].IESQDAGIKTITMLD.[E]_                          | O00161     |         |              |          |         |          |         |              |          |         |          |         |              |          |         |          |         |              |          |         |          |       |
| [A].IPVAQDLNAPS.[D]_                              | P10451     |         |              |          |         |          | 384750  | 463400       | 186031   | 165601  | 76650    | 184492  | 168801       | 182143   | 127322  | 52705    | 25071   |              |          |         |          |       |
| [A].IPVAQDLNAPSD.[W]_                             | P10451     |         |              |          |         |          | 344969  | 304871       | 74700    | 229263  | 152778   |         |              |          |         |          |         |              |          |         |          |       |
| [A].IPVAQDLNAPSDWDSRGKDSY.[E]_                    | P10451     |         |              |          |         |          |         |              |          |         |          |         |              |          |         |          |         |              |          |         |          |       |
| [A].IPVAQDLNAPSDWDSRGKDSYETSQ.[L]_                | P10451     |         |              |          |         |          |         |              |          |         |          |         |              |          |         |          |         |              |          |         |          |       |
| [A].IPVAQDLNAPSDWDSRGKDSYETSQ.[D]_                | P10451     |         |              |          |         |          |         |              |          |         |          |         |              |          |         |          |         |              |          |         |          |       |
| [A].IPVAQDLNAPSDWDSRGKDSYETSQLD.[D]_              | P10451     |         |              |          |         |          |         |              |          |         |          |         |              |          |         |          |         |              |          |         |          |       |
| [A].IPVKQADSGSSEE.[K]_                            | P10451     |         |              |          |         |          |         |              |          |         |          |         |              |          |         |          |         |              |          |         |          |       |
| [A].IPVKQADSGSSEEKQ.[L]_                          | P10451     |         |              |          |         |          |         |              |          |         |          |         |              |          |         |          |         |              |          |         |          |       |
| [A].IPVKQADSGSSEEKQL.[Y]_                         | P10451     |         |              |          |         |          |         |              |          |         |          |         |              |          |         |          |         |              |          |         |          |       |
| [A].IPVKQADSGSSEEKQLY.[N]_                        | P10451     |         |              |          |         |          |         |              |          |         |          |         |              |          |         |          |         |              |          |         |          |       |
| [A].IPVKQADSGSSEEKQLYN.[K]_                       | P10451     |         |              |          |         |          |         |              |          |         |          |         |              |          |         |          |         |              |          |         |          |       |
| [A].IPVKQADSGSSEEKQLYNKYPDAVATWLNPDPSQ.[K]_       | P10451     |         |              |          |         |          | 35352   |              |          | 60148   | 49901    |         |              |          |         |          |         |              |          |         |          |       |
| [A].IQDPRLFAEE.[K]_                               | P01833     |         |              |          |         |          |         |              |          |         |          |         |              |          |         |          |         |              |          |         |          |       |
| [A].IQDPRLFAEEK.[A]_                              | P01833     |         |              |          |         |          |         |              |          |         |          |         |              |          |         |          |         |              |          |         |          |       |
| [A].IQDPRLFAEEKAVADT.[R]_                         | P01833     |         |              |          |         |          | 107049  | 105564       | 206726   | 112799  | 17430    |         |              |          |         |          |         |              |          |         |          |       |
| [A].IQDPRLFAEEKAVADTRDQ.[A]_                      | P01833     |         |              |          |         |          | 143825  | 200025       | 96304    | 598572  | 431489   |         |              |          |         |          |         |              |          |         |          |       |
| [A].IQDPRLFAEEKAVADTRDQADG.[S]_                   | P01833     |         |              |          |         |          |         |              |          |         |          |         |              |          |         |          |         |              |          |         |          |       |
| [A].KDTVYTKGRVM.[P]_                              | P05814     |         |              |          |         |          |         |              |          |         |          |         |              |          |         |          |         |              |          |         |          |       |
| [A].KDTVYTKGRVMP.[V]_                             | P05814     |         |              |          |         |          |         |              |          |         |          |         |              |          |         |          |         |              |          |         |          |       |
| [A].KDTVYTKGRVMPV.[L]_                            | P05814     |         |              |          |         |          |         |              |          |         |          |         |              |          |         |          |         |              |          |         |          |       |
| [A].KDTVYTKGRVMPVL.[K]_                           | P05814     |         |              |          |         |          |         |              |          |         |          |         |              |          |         |          |         |              |          |         |          |       |
| [A].KDTVYTKGRVMPVLKSPITP.[F]_                     | P05814     |         |              |          |         |          |         |              |          |         |          |         |              |          |         |          |         |              |          |         |          |       |
| [A].KLGAVYTEGGFVEGVN.[K]_                         | P19835     |         |              |          |         |          | 134719  | 101129       | 221994   | 187061  | 100833   |         |              |          |         |          |         |              |          |         |          |       |
| [A].KLGAVYTEGGFVEGVNK.[K]_                        | P19835     |         |              |          |         |          | 1287849 | 1234074      | 1567695  | 1547487 | 1304799  |         |              |          |         |          |         |              |          |         |          |       |
| [A].KLGAVYTEGGFVEGVNKKLG.[L]_                     | P19835     |         |              |          |         |          |         |              |          |         |          |         |              |          |         |          |         |              |          |         |          |       |
| [A].KPALEDLR.[Q]_                                 | P02647     |         |              |          |         |          |         |              |          |         |          |         |              |          |         |          |         |              |          |         |          |       |
| [A].KPALEDLRQGLLPVLESFK.[V]_                      | P02647     |         |              |          |         |          |         |              |          |         |          |         |              |          |         |          |         |              |          |         |          |       |
| [A].KTTFDVYTESWAQDPSQENK.[K]_                     | P19835     |         |              |          |         |          | 177425  | 236093       | 193393   | 775017  | 726912   |         |              |          |         |          |         |              |          |         |          |       |
| [A].KVEQAVETEPEPEL.[R]_                           | P02649     |         |              |          |         |          | 33906   | 59508        | 83477    | 57098   | 37245    |         |              |          |         |          |         |              |          |         |          |       |
| [A].KVEQAVETEPEPELR.[Q]_                          | P02649     |         |              |          |         |          | 105792  | 104843       | 245013   | 190204  | 88106    |         |              |          |         |          |         |              |          |         |          |       |
| [A].LENPQPHPGWQGG.[T]_                            | P19835     |         |              |          |         |          | 81768   | 73006        |          | 76030   | 80764    |         |              |          |         |          |         |              |          |         |          |       |
| [A].LENPQPHPGWQGT.[K]_                            | P19835     |         |              |          |         |          | 134409  | 104408       |          | 64038   | 96619    |         |              |          |         |          |         |              |          |         |          |       |
| [A].LENPQPHPGWQGT.[K].[A]_                        | P19835     |         |              |          |         |          |         |              |          | 50625   | 104578   |         |              |          |         |          |         |              |          |         |          |       |
| [A].LGSDPHISMQVQE.[N]_                            | Q13410     |         |              |          |         |          | 80199   | 56687        |          | 52240   | 61198    |         |              |          |         |          |         |              |          |         |          |       |
| [A].LLLNQELLLNPTH.[Q]_                            | P05814     |         |              |          |         |          | 58902   | 62062        | 92737    | 56538   | 56816    |         |              |          |         |          |         |              |          |         |          |       |
| [A].LLLNQELLLNPTHQ.[I]_                           | P05814     |         |              |          |         |          | 35191   | 46777        |          |         |          |         |              |          |         |          |         |              |          |         |          |       |
| [A].LLLNQELLLNPTHQIYPVTQ.[P]_                     | P05814     |         |              |          |         |          | 227787  | 196591       | 708331   | 316722  | 723297   |         |              |          |         |          |         |              |          |         |          |       |
| [A].LLLNQELLLNPTHQIYPVTQPLAPVH.[N]_               | P05814     |         |              |          |         |          |         |              |          |         |          |         |              |          |         |          |         |              |          |         |          |       |
| [A].LLTQQTQLQSLR.[R]_                             | O75888     |         |              |          |         |          |         |              |          |         |          |         |              |          |         |          |         |              |          |         |          |       |
| [A].LPGDNVGFNVK.[N]_                              | P68104     |         |              |          |         |          |         |              |          |         |          |         |              |          |         |          |         |              |          |         |          |       |
| [A].LPPIQKLEP.[Q]_                                | Q99541     |         |              |          |         |          | 41036   | 31085        | 55517    | 26881   | 26337    |         |              |          |         |          |         |              |          |         |          |       |
| [A].LPPIQKLEPQI.AVA.[N]_                          | Q99541     |         |              |          |         |          |         |              |          |         |          |         |              |          |         |          |         |              |          |         |          |       |
| [A].LPPIQKLEPQI.AVANT.[Y]_                        | Q99541     |         |              |          |         |          |         |              |          |         |          |         |              |          |         |          |         |              |          |         |          |       |
| [A].LPPIQKLEPQI.AVANTY.[A]_                       | Q99541     |         |              |          |         |          |         |              |          |         |          |         |              |          |         |          |         |              |          |         |          |       |
| [A].LPPGAFAGAGALQRLD.[L]_                         | Q210M4     |         |              |          |         |          | 380052  | 352293       |          | 338991  | 164499   |         |              |          |         |          |         |              |          |         |          |       |
| [A].LPPQPLWSVPQPK.[V]_                            | P05814     |         |              |          |         |          |         |              |          |         |          |         |              |          |         |          |         |              |          |         |          |       |
| [A].LPPQPLWSVPQPKV.[L]_                           | P05814     |         | 171141       |          | 606585  | 716994   | 3447317 | 3606873      | 2059038  | 5814009 | 11689258 |         |              |          |         |          |         |              |          |         |          |       |
| [A].LPPQPLWSVPQPKVLPPIQQV.[V]_                    | P05814     |         |              |          | 105490  | 384996   | 239203  | 242129       |          | 267438  | 514154   |         |              |          |         |          |         |              |          |         |          |       |
| [A].LPPQPLWSVPQPKVLPPIQQVVPYQRAVPVQA.[L]_         | P05814     |         |              |          |         |          |         |              |          |         |          |         |              |          |         |          |         |              |          |         |          |       |
| [A].LPPQPLWSVPQPKVLPPIQQVVPYQRAVPVQALL.[L]_       | P05814     |         |              |          |         |          | 581221  | 522761       | 577978   | 432217  | 433302   |         |              |          |         |          |         |              |          |         |          |       |
| [A].MTSALPIIQKLEPQIA.[V]_                         | Q99541     |         |              |          |         |          |         |              |          |         |          |         |              |          |         |          |         |              |          |         |          |       |
| [A].NAKGAVTGAKDAVTT.[T]_                          | Q99541     |         |              |          |         |          |         |              |          |         |          |         |              |          |         |          |         |              |          |         |          |       |
| [A].NAKGAVTGAKDAVTTT.[V]_                         | Q99541     |         |              |          |         |          |         |              |          |         |          |         |              |          |         |          |         |              |          |         |          |       |
| [A].NAKGAVTGAKDAVTTT.[G]_                         | Q99541     |         |              |          |         |          |         |              |          |         |          |         |              |          |         |          |         |              |          |         |          |       |
| [A].NAKGAVTGAKDAVTTT.[G].[D]_                     | Q99541     |         |              |          |         |          |         |              |          |         |          |         |              |          |         |          |         |              |          |         |          |       |
| [A].NAKGAVTGAKDAVTTT.[G].[D].[K]_                 | Q99541     |         |              |          |         |          |         |              |          |         |          |         |              |          |         |          |         |              |          |         |          |       |
| [A].NAKGAVTGAKDAVTTT.[G].[D].[K].[V]_             | Q99541     |         |              |          |         |          |         |              |          |         |          |         |              |          |         |          |         |              |          |         |          |       |
| [A].NAKGAVTGAKDAVTTT.[G].[D].[K].[V].[S]_         | Q99541     |         |              |          |         |          |         |              |          |         |          |         |              |          |         |          |         |              |          |         |          |       |
| [A].NAKGAVTGAKDAVTTT.[G].[D].[K].[V].[S].[T]_     | Q99541     |         |              |          |         |          |         |              |          |         |          |         |              |          |         |          |         |              |          |         |          |       |
| [A].NAKGAVTGAKDAVTTT.[G].[D].[K].[V].[S].[T].[G]_ | Q99541     |         |              |          |         |          |         |              |          |         |          |         |              |          |         |          |         |              |          |         |          |       |
| [A].NDESMHSDVIDSQELS.[K]_                         | P10451     |         |              |          |         |          |         |              |          |         |          |         |              |          |         |          |         |              |          |         |          |       |
| [A].NDESMHSDVIDSQELSK.[V]_                        | P10451     |         |              |          |         |          |         |              |          |         |          |         |              |          |         |          |         |              |          |         |          |       |
| [A].NDESMHSDVIDSQELSKVS.[R]_                      | P10451     |         |              |          |         |          | 29958   | 35023        |          |         |          |         |              |          |         |          |         |              |          |         |          |       |
| [A].NDESMHSDVIDSQELSKVS.[R].[H]_                  | P10451     |         |              |          |         |          |         |              |          |         |          |         |              |          |         |          |         |              |          |         |          |       |
| [A].NDESMHSDVIDSQELSKVS.[R].[H].[V]_              | P10451     |         |              |          |         |          |         |              |          |         |          |         |              |          |         |          |         |              |          |         |          |       |
| [A].NDLEDKNSPFYDWHLSQ.[V]_                        | Q14802     |         |              |          |         |          |         |              |          |         |          |         |              |          |         |          |         |              |          |         |          |       |
| [A].NPAVVRPHAQIPQ.[R]_                            | P07498     |         | 37751        | 57356    |         | 40649    | 291344  | 325144       | 192714   | 185484  | 320692   |         |              |          |         |          |         |              |          |         |          |       |
| [A].NPAVVRPHAQIPQ.[R].[H]_                        | P07498     |         |              |          |         |          |         |              |          |         |          |         |              |          |         |          |         |              |          |         |          |       |
| [A].PGQEPPEHMAELQRNEQEPQLGQWHLS.[K]_              | O00391     |         |              |          |         |          | 73048   | 73992        |          |         |          |         |              |          |         |          |         |              |          |         |          |       |
| [A].PSDWDSRGK.[D]_                                | P10451     |         |              |          |         |          | 36240   | 37487        |          | 50260   | 58307    |         |              |          |         |          |         |              |          |         |          |       |
| [A].PSDWDSRGKDS.[V]_                              | P10451     |         |              |          |         |          | 82171   | 105459       | 79609    | 63374   | 39747    |         |              |          |         |          |         |              |          |         |          |       |

| Quartified modified peptide sequence                | Protein ID     | A_-80oC | A_-20oC_120h | A_4oC_6h | A_RT_6h | A_RT_24h | B_-80oC  | B_-20oC_120h | B_4oC_6h | B_RT_6h  | B_RT_24h | C_-80oC | C_-20oC_120h | C_4oC_6h | C_RT_6h | C_RT_24h | D_-80oC  | D_-20oC_120h | D_4oC_6h | D_RT_6h  | D_RT_24h |
|-----------------------------------------------------|----------------|---------|--------------|----------|---------|----------|----------|--------------|----------|----------|----------|---------|--------------|----------|---------|----------|----------|--------------|----------|----------|----------|
| [A].PTGLSAPLSFIPRHF.[R]_                            | Q6WN34         |         |              |          |         |          |          |              |          | 42247    | 28795    |         |              |          |         |          |          |              |          |          |          |
| [A].PTKALENPQPHPGWQVQ.[T]_                          | P19835         |         |              |          |         |          | 49769    | 40338        |          | 57183    | 31258    |         |              |          |         |          |          |              |          |          |          |
| [A].PTKALENPQPHPGWQGLT.[K]_                         | P19835         |         |              |          |         |          | 192849   | 166985       | 203718   | 178967   | 285083   |         |              |          |         |          |          |              |          |          |          |
| [A].PVHNPISV.[-]_                                   | P05814         |         |              | 25795    |         | 42697    | 488539   | 445060       | 205254   | 518957   | 916554   | 241563  | 315991       | 377016   | 1226126 | 3047337  |          |              |          |          |          |
| [A].QDLSCIEPLSPMGEDSAPRDADTLH.[S]_                  | Q13410         |         |              |          |         |          |          |              |          |          |          | 94283   | 72182        | 79472    | 74508   | 26421    |          |              |          |          |          |
| [A].QLGGPEAAKSDATAAK.[-]_                           | P04792         |         |              |          |         |          |          |              |          |          |          | 14527   | 16977        | 21181    | 27026   | 12808    |          |              |          |          |          |
| [A].QPAVILVPQPEI.[M]_                               | P05814         |         |              |          |         |          | 66802    | 51721        |          | 35453    |          | 33665   | 21588        | 34704    | 62047   | 69322    |          |              |          |          |          |
| [A].QPAVILVPQPEIMEVVPKAK.[D]_                       | P05814         |         |              |          |         |          | 137128   | 153738       | 144702   | 113528   | 86222    | 375227  | 318542       | 255933   | 301983  | 257329   |          |              |          |          |          |
| [A].QPAVILVPQPEIMEVVPKAKDTVYT.[K]_1xOxidation [M14] | P05814         |         |              |          |         |          | 132228   | 100615       | 317233   | 43188    | 33302    | 66078   | 109602       | 84065    | 78166   | 68902    |          |              |          |          |          |
| [A].QPAVILVPQPEIMEVVPKAKDTVYTK.[G]_                 | P05814         |         |              |          |         | 58672    | 220008   | 189953       | 706400   | 232145   | 95752    | 563558  | 463389       | 413701   | 466724  | 463012   |          |              |          |          |          |
| [A].QPGQSQVSYQGLPVQK.[T]_                           | Q14766         |         |              |          |         |          |          |              |          |          |          | 100469  | 111315       | 109028   | 75279   | 44169    |          |              |          |          |          |
| [A].RETIESI.[S]_                                    | P05814         |         |              |          |         |          | 881093   | 602778       | 222017   | 1592570  | 381673   |         |              |          |         |          |          |              |          |          |          |
| [A].RETIESI.SSSE.[E]_                               | P05814         |         |              |          |         |          | 63349    | 33913        |          | 39443    | 18346    | 22126   | 15121        | 14654    | 33285   | 44295    |          |              |          |          | 28872    |
| [A].RETIESI.SSSEE.[S]_                              | P05814         |         |              |          |         |          | 48085    | 48145        |          | 54818    |          |         |              |          | 28795   |          |          |              |          |          | 37829    |
| [A].RETIESI.SSSEESI.[T]_                            | P05814         |         |              |          |         |          |          |              |          |          |          |         |              |          |         | 35671    |          |              |          |          |          |
| [A].RETIESI.SSSEESI.[E]_                            | P05814         |         |              |          |         |          |          |              |          |          |          |         |              |          |         | 89032    |          |              |          |          |          |
| [A].RETIESI.SSSEESITE.[V]_                          | P05814         |         |              |          |         |          |          |              |          |          |          |         |              |          |         | 21077    | 118328   | 102856       | 126292   | 68695    | 65122    |
| [A].RPKLPL.[R]_                                     | P47710         |         |              |          |         |          | 3294121  | 2986140      | 2548249  | 3275316  | 2116347  | 58858   | 62919        | 45017    | 37975   | 21077    |          |              |          |          |          |
| [A].RPKLPLR.[V]_                                    | P47710         |         |              |          |         |          | 40335    | 38567        |          | 37599    | 9019     | 45940   | 45457        | 30819    | 58396   | 27657    |          |              |          |          |          |
| [A].RPKLPLRY.[P]_                                   | P47710         |         |              |          |         |          | 75559    | 61096        | 124166   | 88455    | 40137    |         |              |          |         |          |          |              |          |          |          |
| [A].RPKLPLRYPERLQNPSSESPEIPLE.[S]_                  | P47710         |         |              |          |         |          | 74941    | 100779       | 233537   |          |          |         |              |          |         |          |          |              |          |          |          |
| [A].SASEYAHRLGDLKEENLPIL.[Q]_                       | O60664         |         |              |          |         |          |          |              |          |          |          | 42840   | 48511        | 35156    | 44809   | 27939    |          |              |          |          |          |
| [A].SASKFPSSGPVTQPPTALT.[A]_                        | Q9Y679         |         |              |          |         |          |          |              |          |          |          | 55216   | 60892        | 50856    | 40822   | 25940    |          |              |          |          |          |
| [A].SAYYNPGNPHNVYMP.[S]_                            | Q96979         |         |              |          |         |          |          |              |          |          |          | 48179   | 53217        |          | 28575   | 16418    |          |              |          |          |          |
| [A].SEAEADSLSFMQGYMKHATKTA.[K]_                     | P02656         |         |              | 24788    |         | 33881    |          |              |          |          |          |         |              |          |         |          |          |              |          |          |          |
| [A].SEYDYVSFQSDIGPYQSGR.[F]_                        | Q8N474         |         |              |          |         |          |          | 33093        | 93081    |          |          | 44221   | 46590        | 159253   | 54172   | 24197    |          |              |          |          |          |
| [A].SPTKDDSKDSDFWK.[M]_                             | Q13438         |         |              |          |         |          |          | 52805        |          | 84415    | 63884    |         |              |          |         |          |          |              |          |          |          |
| [A].SRELPPPPPP.[P]_                                 | B1AK53         |         |              |          |         |          | 33546    | 45551        |          | 17657    | 11347    | 33911   | 39765        | 35679    | 39454   | 17924    |          |              |          |          |          |
| [A].SSIIDELFQDRFFTREPQDTYHYLP.[F]_                  | P10909         |         |              |          |         |          |          |              |          |          | 209869   |         |              |          |         |          |          |              |          |          |          |
| [A].STITGVMDKTKGAVTG.[S]_                           | Q99541         |         |              |          |         |          |          |              |          |          |          | 141087  | 218305       | 217998   | 123674  | 71774    |          |              |          |          |          |
| [A].SVAVDOPQPSVTVRVVN.[L]_                          | Q99541         |         |              |          |         |          |          |              |          |          |          |         |              |          | 32775   | 28302    |          |              |          |          |          |
| [A].SVDSGSSEEQGGSSRAL.[V]_                          | P01833         |         |              |          |         |          |          |              |          |          |          |         |              |          |         |          |          |              |          |          |          |
| [A].SVDSGSSEEQGGSSRALVS.[T]_                        | P01833         |         |              |          |         |          | 26742    | 38970        |          | 34342    | 16244    |         |              |          |         |          |          |              | 24379    | 26915    | 24438    |
| [A].SVDSGSSEEQGGSSRALVSTLVLPG.[L]_                  | P01833         |         |              |          |         |          | 22935428 | 23288544     | 26736365 | 16300068 | 8905151  |         |              |          |         |          | 20554128 | 16099529     | 17679998 | 20333603 | 11051529 |
| [A].TIGGVAWIGGKSL.[V]_                              | Q8WU6H         |         |              |          |         |          |          |              |          |          |          |         |              |          |         |          |          |              |          |          |          |
| [A].TLVQDGIAGK.[R]_                                 | Q13410         |         |              |          |         |          |          |              |          |          |          | 22754   | 31574        | 35101    | 19509   |          | 34348    | 60038        | 59907    |          |          |
| [A].TPRYDSKNGTLV.[-]_                               | Q96A22         |         |              |          |         |          |          |              |          |          |          |         |              |          |         |          |          |              |          |          |          |
| [A].TQLSEAVDTRGAVQ.[S]_                             | O60664         |         |              |          |         |          |          |              |          |          |          | 349244  | 390714       | 326720   | 319787  | 192154   |          |              |          |          |          |
| [A].TSEVSPNSKPSNT.[K]_                              | P12272         |         |              |          |         |          |          |              |          |          |          | 43042   | 44052        | 24705    | 28091   | 25689    |          |              |          |          |          |
| [A].TVGSLAGQPLQERAQAWGERL.[R]_                      | P02649         |         |              |          | 145080  | 11049    | 11752    | 17788        |          | 61238    | 47904    |         |              |          |         |          |          |              |          |          |          |
| [A].VADTRDQADGSRASVD.[S]_                           | P01833         |         |              |          |         |          | 36974    | 40210        | 56653    |          |          |         |              |          |         |          |          |              |          |          |          |
| [A].VADTRDQADGSRASVDGSSEEQGGSSRALVSTLVLPG.[L]_      | P01833         |         |              |          |         |          | 50704    | 45111        |          | 25068    |          |         |              |          |         |          |          |              |          |          |          |
| [A].VADTRDQADGSRASVDGSSEEQGGSSRALVSTLVLPG.[L]_      | P01833         |         |              |          |         |          |          |              |          |          |          | 24875   | 19768        | 23508    | 22300   | 18066    |          |              |          |          |          |
| [A].VDPQPSVTVRVVN.[L]_                              | Q99541         |         |              |          |         |          |          |              |          |          |          | 659114  | 775451       | 762805   | 629514  | 314924   | 233740   | 216839       | 214834   |          | 113626   |
| [A].VDPQPSVTVRVVN.[L]_                              | Q99541         |         |              |          |         |          |          |              |          |          |          | 640703  | 705598       | 645558   | 569759  | 335991   | 76705    | 72669        | 86955    | 57053    | 26806    |
| [A].VEVQNQKQPAChENDERPFYQ.[K]_                      | P07498         |         |              |          |         |          |          |              |          |          |          | 181952  | 241893       | 265394   | 224677  | 144038   |          |              |          |          |          |
| [A].VGVDVDTQFVRFDSDAASPR.[G]_                       | Q07000; P30510 |         |              |          |         |          |          | 44198        |          |          | 76346    |         |              |          |         |          |          |              |          |          |          |
| [A].VLVHRDGRQEAEQMPFY.[R]_                          | Q13410         |         |              |          |         |          | 57928    | 58935        | 85487    | 68310    | 80108    |         |              |          |         |          |          |              |          |          |          |
| [A].VLVHRDGRQEAEQMPFY.[G]_                          | Q13410         |         |              |          |         |          | 64322    | 144556       | 128204   | 59814    | 28938    |         |              |          |         |          |          |              |          |          |          |
| [A].VPVQALLNQE.[L]_                                 | P05814         |         |              |          |         | 25844    | 48422    | 55963        |          | 33493    | 54067    | 42162   | 52137        | 36877    | 23888   |          |          |              |          |          |          |
| [A].VPVQALLNQELL.[L]_                               | P05814         |         |              |          |         |          |          |              |          |          |          |         | 53568        |          |         |          |          |              |          |          |          |
| [A].VPVQALLNQELLNPT.[H]_                            | P05814         |         |              |          |         |          |          |              |          |          |          |         |              |          |         |          |          |              |          |          |          |
| [A].VPVQALLNQELLNPTHQ.[I]_                          | P05814         |         |              |          |         |          |          |              |          |          |          |         |              |          |         |          |          |              |          |          |          |
| [A].VPVQALLNQELLNPTHQIYP.[V]_                       | P05814         |         |              |          | 203138  | 59278    | 1132093  | 1031445      | 731240   | 667410   | 317059   | 3449001 | 3196772      | 3336769  | 3082775 | 1978801  |          |              |          |          |          |
| [A].VPVQALLNQELLNPTHQIYPVTPQLAPLVHN.[P]_            | P05814         |         |              |          |         | 118634   | 792381   | 749384       | 383684   | 541814   | 429211   | 587882  | 588246       | 647177   | 672477  | 553299   |          |              |          |          |          |
| [A].VTVYVFTNELKQMQDKYSK.[S]_                        | P50591         |         |              |          |         |          | 1412348  | 1260570      |          | 841382   | 696998   |         |              |          |         |          |          |              |          |          |          |
| [A].VVLVPQPEIMEVPKA.[K]_                            | P05814         |         |              |          |         |          |          |              |          | 59660    |          | 375668  | 180844       | 317119   | 339453  | 257162   |          |              |          |          |          |
| [A].VVLVPQPEIMEVPKADT.[V]_                          | P05814         |         |              |          |         |          |          |              |          | 273369   | 430449   |         |              |          |         |          |          |              |          |          |          |
| [A].VVRPHAQIPQR.[Q]_                                | P07498         |         |              |          |         |          |          |              |          |          |          |         |              |          |         |          |          |              |          |          |          |
| [A].VYTEGGFVEGVNKKLGLLGSDVDIFK.[G]_                 | P19835         |         |              |          |         |          | 38888    | 50131        | 136470   | 69815    | 166179   |         |              |          |         |          |          |              |          |          |          |
| [A].WLDGSGTSGGLEGDH.[L]_                            | P12272         |         |              |          |         |          | 79818    | 52094        |          | 80708    |          |         |              |          |         |          |          |              |          |          |          |
| [A].YKAIPVAQDLN.[A]_                                | P10451         |         |              |          |         |          |          |              |          |          |          |         |              |          |         |          |          |              |          |          |          |
| [C].EMAENGVKTTITS.[V]_                              | Q99541         |         |              |          |         |          |          |              |          |          |          |         |              |          |         |          |          |              |          |          |          |
| [C].EMAENGVKTTITSVAMT.[A]_                          | Q99541         |         |              |          |         |          |          |              |          |          |          |         |              |          |         |          |          |              |          |          |          |
| [C].EVVWTQRLHGGSSAPLPQDRGF.[L]_                     | Q92673         |         |              |          |         |          |          |              |          |          |          |         |              |          |         |          |          |              |          |          |          |
| [C].HENDERPFYQ.[K]_                                 | P07498         |         |              |          |         |          | 83895    | 122087       |          | 100619   | 100134   |         |              |          |         |          |          |              |          |          |          |
| [C].RLNEYNLQLQAAHAQEQIR.[R]_                        | P47710         |         |              |          |         |          | 91714    | 94018        | 72257    | 164848   | 219404   | 94031   | 53199        | 83336    | 71914   | 29788    |          |              |          |          |          |
| [C].VVAEPKMESSISSSEEMSL.[K]_                        | P47710         |         |              |          |         |          |          |              |          |          |          |         |              |          |         |          |          |              |          |          |          |
| [D].AAPDEKVLDSGFRFRIENK.[A]_                        | P01833         |         |              |          |         |          | 60465    | 82913        | 158822   | 128630   | 205186   | 41587   | 48281        |          | 48788   | 16823    |          |              |          |          |          |
| [D].ADTLHSLK.[P]_                                   | Q13410         |         |              |          |         |          |          |              |          |          |          |         |              |          |         |          |          |              |          |          |          |
| [D].ADTLHSLKIPT.[Q]_                                | Q13410         |         |              |          |         |          |          |              |          |          |          |         |              |          |         |          |          |              |          |          |          |
| [D].ADTLHSLKIPTQPSQ.[G]_                            | Q13410         |         |              |          |         |          |          |              |          |          |          |         |              |          |         |          |          |              |          |          |          |
| [D].APPPPAAPLPRWVGPIG.[V]_                          | Q99523         |         |              |          |         |          |          |              |          |          |          |         |              |          |         |          |          |              |          |          |          |
| [D].DIQYVFGKFPATPTGYRPQD.[R]_                       | P19835         |         |              |          |         |          |          |              |          |          |          |         |              |          |         |          |          |              |          |          |          |
| [D].DLYSTIKV.[-]_                                   | P33121         |         |              |          |         |          |          |              |          |          |          |         |              |          |         |          |          |              |          |          |          |

| Quantified modified peptide sequence        | Protein ID | A_−80oC | A_−20oC_120h | A_4oC_6h | A_RT_6h | A_RT_24h | B_−80oC | B_−20oC_120h | B_4oC_6h | B_RT_6h | B_RT_24h | C_−80oC | C_−20oC_120h | C_4oC_6h | C_RT_6h | C_RT_24h | D_−80oC | D_−20oC_120h | D_4oC_6h | D_RT_6h | D_RT_24h |
|---------------------------------------------|------------|---------|--------------|----------|---------|----------|---------|--------------|----------|---------|----------|---------|--------------|----------|---------|----------|---------|--------------|----------|---------|----------|
| [D].DPDAPLPVTPLQ.[L]_                       | P0C0L4     |         |              |          |         |          |         |              |          |         |          | 119181  | 124701       | 130764   | 128209  | 48505    |         |              |          |         |          |
| [D].DQSAETHSHKQS.[R]_                       | P10451     |         |              |          |         |          |         |              |          |         |          | 221835  | 243803       | 108586   | 178563  | 152620   |         |              |          |         |          |
| [D].DQSAETHSHKQSRLY.[K]_                    | P10451     |         |              |          |         | 16969    |         |              |          |         |          | 386562  | 507929       | 362342   | 307022  | 209519   |         |              |          |         |          |
| [D].EDITSHME.[S]_                           | P10451     |         |              |          |         |          |         |              |          |         |          | 294160  | 201466       | 224980   | 384252  | 222578   |         |              |          |         |          |
| [D].EDITSHMESE.[E]_                         | P10451     |         |              |          |         |          | 1871628 | 1499366      | 303303   | 1638364 | 433202   | 30695   | 26741        | 38871    | 37610   |          |         |              |          |         |          |
| [D].EDITSHMESEELNGAY.[K]_                   | P10451     |         |              |          |         |          | 515951  | 299242       | 159307   | 425900  | 425029   | 110443  | 76616        | 130754   | 93469   | 70402    |         |              |          |         |          |
| [D].EERQGPPLGGQQ.[S]_                       | P02810     |         |              |          |         |          |         |              |          |         |          |         |              |          |         |          |         | 28535        |          |         |          |
| [D].EPPQSPWDRVKD.[L]_                       | P02647     |         |              |          |         |          |         |              |          |         |          |         |              |          |         |          |         |              |          |         |          |
| [D].ERPFYQK.[T]_                            | P07498     |         |              |          |         |          | 123565  | 119238       | 230037   | 190607  | 99219    |         | 152683       | 184267   | 180129  | 146563   | 86121   |              |          |         |          |
| [D].GPERVTVIANAQDLS.[K]_                    | Q13410     |         |              |          |         |          |         |              |          |         |          | 133596  | 154489       | 180638   | 130895  | 86856    |         |              |          |         |          |
| [D].GREQEAEQMPEYR.[G]_                      | Q13410     |         |              |          |         |          | 233853  | 297684       | 259570   | 238717  | 127552   | 189587  | 141583       | 129042   | 149200  | 98190    | 328264  | 327670       | 398756   | 212555  | 268110   |
| [D].GREQEAEQMPEYR.[G]_1xOxidation [M9]      | Q13410     |         |              |          |         |          |         |              |          |         |          |         |              |          |         |          |         | 6561         | 29978    |         | 13378    |
| [D].GREQEAEQMPEYRG.[R]_                     | Q13410     |         |              |          |         |          |         |              |          |         |          |         |              |          |         |          |         |              |          |         |          |
| [D].GSYEALVHLK.[V]_                         | Q13410     |         |              |          |         | 16012    | 131027  | 178907       | 189182   | 163856  | 114202   | 30482   | 31584        | 33376    | 31953   | 25343    |         |              |          |         |          |
| [D].IQYPDATDEDITSH.[M]_                     | P10451     |         |              |          |         |          | 23575   |              |          |         |          |         |              |          |         |          |         |              |          |         |          |
| [D].IQYPDATDEDITSHMESEELNGAYK.[A]_          | P10451     |         |              |          |         |          | 89087   | 112225       |          | 43335   | 34927    | 499427  | 478623       | 359376   | 314052  | 137871   |         |              |          |         |          |
| [D].ISNPATAHENYEKNNVMLQW.[-]_               | P47710     |         |              |          |         |          |         |              |          |         |          | 409690  | 407351       | 442095   | 487446  | 502214   |         |              |          |         |          |
| [D].KIYPSFQPP.[L]_                          | P05814     |         |              |          |         |          | 53970   |              | 99753    | 40462   | 33339    | 88396   | 37415        | 90935    | 50334   | 32493    | 19573   | 25176        | 29931    |         | 16907    |
| [D].KIYPSFQPPQLI.[V]_                       | P05814     |         |              |          |         |          | 895967  | 577589       | 2348891  | 385297  | 172035   | 506206  | 495259       | 486324   | 671481  | 455534   | 75339   | 26196        | 101211   | 111142  | 114744   |
| [D].KIYPSFQPPQLIY.[P]_                      | P05814     |         |              |          |         |          | 39434   | 29876        | 112512   | 41414   | 43962    | 28149   | 33929        | 29538    | 33979   | 26232    |         |              |          |         |          |
| [D].KIYPSFQPPQLIYPFVE.[P]_                  | P05814     |         |              |          |         |          | 257863  | 214586       | 631095   | 265266  | 217299   |         | 17876        |          | 49380   | 41187    |         |              |          |         |          |
| [D].KIYPSFQPPQLIYPFVEPIPGFLPQNI.[L]_        | P05814     |         |              |          |         |          |         |              |          |         |          |         |              |          |         |          |         |              |          |         |          |
| [D].KTKGAVTGSVEKTSVVG.[S]_                  | Q99541     |         |              |          |         |          |         |              |          |         |          | 23697   | 59524        | 29429    | 36722   | 37137    |         |              |          |         |          |
| [D].LENLHLP.L.[L]_                          | P05814     |         |              |          |         |          | 277899  | 210612       | 188975   | 300286  | 448827   | 173328  | 154840       | 131828   | 263861  | 290466   |         |              |          |         |          |
| [D].LENLHLP.LPL.[Q]_                        | P05814     |         |              |          |         |          | 291976  | 198376       |          | 276962  | 321963   | 79850   |              |          | 242749  | 222121   |         |              |          |         |          |
| [D].LENLHLP.LPL.LQ.[P]_                     | P05814     |         |              |          |         |          | 455005  | 313688       | 336844   | 353655  | 774282   | 102229  | 108127       | 117517   | 265371  | 289923   |         |              |          |         |          |
| [D].LENLHLP.LPL.LQPLM.[Q]_                  | P05814     |         |              |          |         |          | 430552  | 248862       | 526993   | 205295  | 223378   | 140376  | 181145       | 267132   | 619947  | 596010   |         |              |          |         | 72210    |
| [D].LENLHLP.LPL.LQPLMQ.[Q]_                 | P05814     |         |              |          |         |          | 212995  | 134874       | 367831   | 172527  | 141401   | 93808   | 92992        | 161474   | 395785  | 432899   |         |              |          |         | 227070   |
| [D].LENLHLP.LPL.LQPLMQQ.[V]_                | P05814     |         |              |          |         |          |         |              |          |         |          |         | 14533        | 18084    | 25169   | 54411    |         |              |          |         | 255239   |
| [D].LENLHLP.LPL.LQPLMQQP.[Q]_               | P05814     |         |              |          |         |          |         |              |          |         |          | 59305   | 54784        | 50259    | 35411   | 16684    |         |              |          |         |          |
| [D].LENLHLP.LPL.LQPLMQQVPQPIQTAL.[A]_       | P05814     |         |              |          |         | 256317   | 449581  | 417273       | 465232   | 349190  | 476550   | 230536  | 57640        | 308105   | 1115898 | 3845669  |         |              |          |         | 1104641  |
| [D].LENLHLP.LPL.LQPLMQQVPQPIQTAL.[P]_       | P05814     |         |              |          |         |          | 55483   | 43362        |          | 26309   |          | 64233   | 77129        | 42771    | 120987  | 377287   |         |              |          |         | 124833   |
| [D].LMSSAYLSTKDQYPYLK.[S]_                  | Q99541     |         |              |          |         |          |         |              |          |         |          | 44058   | 44478        | 43802    | 44877   | 16166    |         |              |          |         |          |
| [D].LNAPSDWDSRGK.[D]_                       | P10451     |         |              |          |         |          |         |              |          |         |          | 21888   |              | 26114    | 23779   | 16501    |         |              |          |         |          |
| [D].LNAPSDWDSRGKDS.[Y]_                     | P10451     |         |              |          |         |          |         |              |          |         |          | 83397   | 89610        | 24084    | 26795   | 39646    |         |              |          |         |          |
| [D].LPAEAAAARGGGGGGGGGGRPQA.[R]_            | Q86Y38     |         |              |          |         |          | 50731   | 59432        | 74656    | 37205   | 23002    |         |              |          |         |          |         |              |          |         |          |
| [D].MLVVDPKSKEED.[K]_                       | P10451     |         |              |          |         |          | 46712   | 64756        |          | 58013   | 37284    |         |              |          |         |          |         |              |          |         |          |
| [D].PDTAHPHLF.[L]_                          | Q13410     |         |              |          |         |          |         |              |          |         |          | 22892   | 31438        | 40132    | 35451   | 18974    |         |              |          |         |          |
| [D].PDTAHPHLFLYEDSK.[S]_                    | Q13410     |         |              |          |         |          |         |              |          |         |          | 25466   |              | 20956    |         |          |         |              |          |         |          |
| [D].PQIPKL.[T]_                             | P05814     |         |              |          |         |          | 38603   | 32672        | 67724    | 20506   | 47976    | 46950   | 67348        | 76809    | 93037   | 130611   |         |              |          |         |          |
| [D].PQIPKLT.[L]_                            | P05814     |         |              |          |         |          | 43762   | 43283        | 120216   | 27478   | 37396    | 32072   | 45121        | 54836    | 85565   | 330639   |         |              |          |         |          |
| [D].PQIPKLTDLLEN.[L]_                       | P05814     |         |              |          |         |          |         |              | 84184    | 59729   | 70355    |         |              |          |         |          |         |              |          |         |          |
| [D].PQIPKLTDLLEN.[H]_                       | P05814     |         |              |          |         |          |         |              |          |         |          |         |              |          |         |          |         |              |          |         | 43010    |
| [D].PQIPKLTDLLENH.[L]_                      | P05814     |         |              |          |         |          |         |              |          |         |          | 26126   | 19199        | 28623    | 26178   | 18259    |         |              |          |         |          |
| [D].PQIPKLTDLLENHLP.[L]_                    | P05814     |         | 123900       | 117826   |         | 114262   |         |              |          |         |          |         |              |          |         |          |         |              |          |         |          |
| [D].PQIPKLTDLLENHLP.[P]_                    | P05814     |         |              |          |         | 35220    |         |              |          |         |          |         |              |          |         |          |         |              |          |         |          |
| [D].PQIPKLTDLLENHLP.L.[L]_                  | P05814     |         |              |          |         |          |         |              |          |         |          |         |              |          |         |          |         |              |          |         |          |
| [D].PQIPKLTDLLENHLP.LP.[L]_                 | P05814     |         | 35624        | 39765    | 46401   | 303732   | 316497  | 359957       | 934784   | 636411  | 1265661  | 223521  | 123309       | 57415    | 167038  | 203089   |         |              |          |         |          |
| [D].PQIPKLTDLLENHLP.LPL.[L]_                | P05814     |         |              |          |         |          |         |              |          |         |          |         |              |          |         | 15163    | 31596   |              |          |         |          |
| [D].PQIPKLTDLLENHLP.LPL.LQPLM.[Q]_          | P05814     |         |              |          |         |          |         |              |          |         |          |         |              |          |         | 36565    | 103191  |              |          |         |          |
| [D].PQIPKLTDLLENHLP.LPL.LQPLMQQVPQPIP.[Q]_  | P05814     |         |              |          |         |          |         |              |          |         |          |         | 19323        | 20223    | 29474   | 14214    |         |              |          |         |          |
| [D].PQIPKLTDLLENHLP.LPL.LQPLMQQVPQPIQT.[L]_ | P05814     |         |              |          |         |          |         |              |          |         |          | 34208   | 51418        | 27767    | 45132   | 39250    |         |              |          |         |          |
| [D].PRLFAEEKAVADT.[R]_                      | P01833     |         |              |          |         |          | 105334  | 93532        | 83947    | 184770  | 326600   |         |              |          |         |          |         |              |          |         |          |
| [D].PRLFAEEKAVADTRDQ.[A]_                   | P01833     |         |              |          |         |          |         |              |          |         |          | 299080  | 408739       | 355659   | 355952  | 184703   | 456862  | 635104       | 505529   | 271520  | 252509   |
| [D].PRLFAEEKAVADTRDQA.[D]_                  | P01833     |         |              |          |         | 25338    | 35633   |              |          | 32547   | 44229    |         |              |          |         |          |         |              |          |         |          |
| [D].QADGSRASVDSGSSEEQGGSSSR.[A]_            | P01833     |         |              |          |         |          | 80017   | 87320        | 97010    | 39695   | 5636     | 22004   | 25368        | 38052    | 30294   | 22861    | 12360   | 16454        |          |         | 7960     |
| [D].QADGSRASVDSGSSEEQGGSSRALVST.[L]_        | P01833     |         |              |          |         |          | 50447   | 79835        |          | 36585   | 37250    |         |              |          |         |          |         |              |          |         |          |
| [D].QADGSRASVDSGSSEEQGGSSRALVSTLVPLG.[L]_   | P01833     |         |              |          |         |          |         |              |          |         |          |         |              |          |         |          |         |              |          |         |          |
| [D].QQQGEDEHQDKIYPSFQPPQLIYP.[F]_           | P05814     |         |              |          |         |          |         |              |          |         |          | 75758   | 77847        | 67839    | 36896   | 18387    | 197503  | 184723       | 216233   | 163365  | 241362   |
| [D].QRRDFIDIESK.[F]_                        | P06858     |         |              |          |         |          |         |              |          | 36775   | 27555    |         |              |          |         |          |         |              |          |         |          |
| [D].QSAETHSHKQSRLY.[K]_                     | P10451     |         |              |          |         |          |         |              |          |         |          | 64954   | 50528        | 71359    | 68356   | 35614    |         |              |          |         |          |
| [D].RLDEVKEQVAEVR.[A]_                      | P02649     |         |              |          |         |          | 28045   | 38294        |          | 16490   |          |         |              |          |         |          |         |              |          |         |          |
| [D].RSPYEKVSAGNGSSLS.[Y]_                   | P15941     |         |              |          |         |          |         |              | 227012   | 38813   | 11214    |         |              |          |         |          | 31626   | 26924        |          |         |          |
| [D].RSPYEKVSAGNGSSLSY.[T]_                  | P15941     |         |              |          |         |          |         | 39102        | 889444   | 23940   |          | 37023   | 52182        | 41967    |         | 27927    | 53451   | 37053        |          |         |          |
| [D].SAPRDADTLHSKIPIPTQ.[P]_                 | Q13410     |         |              |          |         |          |         |              |          |         |          | 531776  | 571157       | 606338   | 452430  | 299108   |         |              |          |         |          |
| [D].SAPRDADTLHSKIPIPTQPS.[Q]_               | Q13410     |         |              |          |         |          |         |              |          |         |          | 69040   | 73279        | 76632    | 63664   | 27076    |         |              |          |         |          |
| [D].SDPITVTPVPEVSRKNP.[K]_                  | P10909     |         |              |          |         |          |         |              |          |         |          | 23888   | 27398        | 27751    | 19806   | 14429    |         |              |          |         |          |
| [D].SGSSEEQGGSSRALV.[S]_                    | P01833     |         |              |          |         |          | 96155   | 105137       | 54740    | 52117   | 11912    | 74567   | 81430        | 85437    | 111720  | 46801    | 168113  | 175571       | 186544   | 145860  | 73825    |
| [D].SGSSEEQGGSSRALVS.[T]_                   | P01833     |         |              |          |         |          | 60882   | 42783        |          | 41395   | 9512     |         |              |          |         |          |         |              |          |         |          |
| [D].SGSSEEQGGSSRALVST.[L]_                  | P01833     |         |              |          |         |          | 202726  | 241933       | 170323   | 84954   | 61860    | 179919  | 188866       | 229730   | 197450  | 97974    | 54885   | 52472        | 71089    | 41409   | 24876    |
| [D].SGSSEEQGGSSRALVSTLVPLG.[L]_             | P01833     |         |              |          |         |          | 3333518 | 3304829      | 2807352  | 2567347 | 2282758  | 2701100 | 2852994      | 4025053  | 3936127 | 4128947  | 918504  | 813198       | 858909   | 1082419 | 915462   |
| [D].SQELSKVSREF.[H]_                        | P10451     |         |              |          |         |          |         |              |          |         |          | 37618   | 36701        | 20235    | 38758   | 17339    |         |              |          |         |          |
| [D].SVDIFK.[G]_                             | P19835     |         |              |          |         |          | 41719   | 38123        |          | 99068   | 72592    |         |              |          |         |          |         |              |          |         |          |
| [D].TLHSKIPIPTQ.[P]_                        | Q13410     |         |              |          |         |          |         |              |          |         |          | 49054   | 53918        | 45651    | 22013   | 15370    |         |              |          |         |          |
| [D].TLHSKIPIPTQPSQGAP.[-]_                  | Q13410     |         |              |          |         |          |         |              |          |         |          | 31917   | 37995        | 35072    | 30872   | 20152    |         |              |          |         |          |

| Quantified modified peptide sequence    | Protein ID | A_-80oC | A_-20oC_120h | A_4oC_6h | A_RT_6h | A_RT_24h | B_-80oC | B_-20oC_120h | B_4oC_6h | B_RT_6h | B_RT_24h | C_-80oC | C_-20oC_120h | C_4oC_6h | C_RT_6h | C_RT_24h | D_-80oC | D_-20oC_120h | D_4oC_6h | D_RT_6h | D_RT_24h |
|-----------------------------------------|------------|---------|--------------|----------|---------|----------|---------|--------------|----------|---------|----------|---------|--------------|----------|---------|----------|---------|--------------|----------|---------|----------|
| [D].TRDQADGSRASVDGSGSEEQGGSS.[R]_       | P01833     |         |              |          |         |          | 23056   | 41959        | 58649    | 20160   | 10807    | 45485   | 49381        | 71664    | 68556   | 26748    |         |              |          |         |          |
| [D].TRDQADGSRASVDGSGSEEQGGSSRALVST.[L]_ | P01833     |         |              |          |         |          |         |              |          |         |          | 31545   | 48197        | 48262    | 63019   | 16307    |         |              |          |         |          |
| [D].TVYTKGRVMP.[V]_                     | P05814     |         |              |          | 64131   | 33750    |         |              |          |         |          | 19925   | 25864        | 29456    | 62919   | 53928    |         |              |          |         |          |
| [D].TVYTKGRVMPVL.[K]_1xOxidation [M9]   | P05814     |         |              |          |         | 88134    | 33470   | 30569        | 83443    | 72175   | 61635    | 13027   |              | 19680    | 37291   | 74756    |         |              |          |         |          |
| [D].TVYTKGRVMPVLKSP.[T]_                | P05814     |         |              |          |         |          |         |              |          |         |          | 35159   | 46788        | 48434    | 48878   | 118754   |         |              |          |         |          |
| [D].TVYTKGRVMPVLKSPITP.[F]_             | P05814     |         |              |          |         |          |         |              |          |         |          | 182369  | 188194       | 193276   | 151153  | 173125   |         |              |          |         |          |
| [D].VYTESWAQDPSPQENK.[K]_               | P19835     |         |              |          |         |          | 104769  | 133959       | 102930   | 85681   | 155864   | 67413   | 110006       | 52559    | 55449   | 25007    |         |              |          |         |          |
| [D].WDSRGKDSYETSQ.L[D]_                 | P10451     |         |              |          |         |          |         |              |          |         |          | 29182   | 33293        | 18176    | 35645   | 26407    |         |              |          |         |          |
| [D].WDSRGKDSYETSQ.L[D]_                 | P10451     |         |              |          |         |          |         |              |          |         |          |         |              |          |         |          |         |              |          |         |          |
| [D].WDSRGKDSYETSQ.LDD.[Q]_              | P10451     |         |              |          |         |          | 356788  | 295890       | 105820   | 347069  | 180917   |         |              |          |         |          |         |              |          |         |          |
| [D].WDSRGKDSYETSQ.LDDQSAETHSHKQS.[R]_   | P10451     |         |              |          |         |          |         |              |          |         |          | 46858   | 32869        | 30134    | 62236   | 62145    |         |              |          |         |          |
| [E].AEQMPEYR.[G]_                       | Q13410     |         |              |          |         |          | 36475   | 32271        |          | 50340   |          | 40978   | 35947        | 44374    | 33896   | 21873    |         |              |          |         |          |
| [E].DEHQDKIYPS.[F]_                     | P05814     |         |              |          |         |          | 888907  | 1064033      | 706970   | 663209  | 108088   | 221862  | 302357       | 232709   | 124030  | 70435    | 309923  | 273932       | 222269   | 90233   | 29816    |
| [E].DEHQDKIYPSFQPQLP.[Y]_               | P05814     |         |              |          |         |          | 745792  | 624097       | 272311   | 471196  | 288361   |         |              |          |         |          |         |              |          |         |          |
| [E].DEHQDKIYPSFQPQLPIYP.[F]_            | P05814     |         |              |          |         |          | 64617   | 64612        |          | 52797   |          | 58359   | 50134        | 35032    | 42432   | 28335    |         |              |          |         |          |
| [E].DEHQDKIYPSFQPQLPIYPFVEPIPY.[G]_     | P05814     |         |              |          |         |          |         |              |          |         | 34267    |         |              |          |         |          |         |              |          |         |          |
| [E].DENFILK.[H]_                        | P62937     |         |              |          |         |          | 77226   | 96291        |          | 86733   | 109474   |         |              |          |         |          |         |              |          |         |          |
| [E].DEVERVITIMQNPRQY.[K]_               | P62269     |         |              |          |         |          | 48471   | 41957        |          |         |          |         | 14703        | 26454    | 14817   |          |         |              |          |         |          |
| [E].DFYKLVSEFTITK.[G]_                  | P19835     |         |              |          |         |          | 146700  | 156687       |          | 221617  | 485050   |         |              |          |         |          |         |              |          |         |          |
| [E].DFYKLVSEFTITKG.[L]_                 | P19835     |         |              |          |         |          | 92455   | 51801        |          |         |          |         |              |          |         |          |         |              |          |         |          |
| [E].DFYKLVSEFTITKGLRGA.[K]_             | P19835     |         |              |          |         |          | 41224   | 79535        | 45685    |         | 18023    |         |              |          |         |          |         |              |          |         |          |
| [E].DGESSGANDSLRTPQSGNSGTGDA.[S]_       | Q12913     |         |              |          |         |          | 81001   | 103481       | 157517   | 57397   | 24487    |         |              |          |         |          |         |              |          |         |          |
| [E].DGPFLKSGDAIAVD.[M]_                 | P68104     |         |              |          |         |          |         |              | 196508   |         |          | 101785  | 130470       | 103046   | 77472   | 52437    |         |              |          |         |          |
| [E].DGSYEALVHL.[K]_                     | Q13410     |         |              |          |         |          | 50980   | 54688        |          | 126633  | 280042   |         |              |          |         |          |         |              |          |         |          |
| [E].DITSHME.[S]_                        | P10451     |         |              |          |         |          | 334546  | 264329       | 106248   | 48684   |          |         |              |          |         |          |         |              |          |         |          |
| [E].DITSHMSEELNGAYK.[A]_                | P10451     | 34932   | 31422        |          |         | 80455    | 9415    |              |          |         |          |         |              |          |         |          |         |              |          |         |          |

| Quantified modified peptide sequence               | Protein ID | A_-80oC | A_-20oC_120h | A_4oC_6h | A_RT_6h | A_RT_24h | B_-80oC | B_-20oC_120h | B_4oC_6h | B_RT_6h | B_RT_24h | C_-80oC | C_-20oC_120h | C_4oC_6h | C_RT_6h | C_RT_24h | D_-80oC | D_-20oC_120h | D_4oC_6h | D_RT_6h | D_RT_24h |
|----------------------------------------------------|------------|---------|--------------|----------|---------|----------|---------|--------------|----------|---------|----------|---------|--------------|----------|---------|----------|---------|--------------|----------|---------|----------|
| [E].KVLADTKELVSSKVS.[G]_                           | O60664     |         |              |          |         |          |         |              |          |         |          |         | 25504        |          |         |          |         |              |          |         |          |
| [E].KVLADTKELVSSKVS.GAQ.[E]_                       | O60664     |         |              |          |         |          |         |              |          |         |          | 41913   | 43085        | 42148    | 27990   | 25836    |         |              |          |         |          |
| [E].KVLADTKELVSSKVS.GAQEMVS.[S]_                   | O60664     |         |              |          |         |          |         |              |          |         |          | 46295   | 50208        | 54301    | 40263   | 28281    |         |              |          |         |          |
| [E].LLLNPTHQIYPVT.[Q]_                             | P05814     |         |              |          |         |          |         |              |          |         |          | 22856   | 25038        | 39316    | 195079  | 421502   |         |              |          |         |          |
| [E].LLLNPTHQIYPVTQ.[P]_                            | P05814     |         |              |          |         |          |         |              |          |         |          | 50135   | 70263        | 50870    | 125201  | 206955   | 12369   | 10122        |          | 101550  | 366424   |
| [E].LLLNPTHQIYPVTQPLAPVH.[N]_                      | P05814     |         |              |          |         |          | 53063   | 56404        |          | 44414   | 45328    |         |              |          |         | 330781   | 1039904 |              |          | 45233   | 107956   |
| [E].LLLNPTHQIYPVTQPLAPVHNPI.[S]_                   | P05814     |         |              |          |         |          |         |              |          |         |          |         |              |          |         |          |         |              |          |         | 490877   |
| [E].LQFSLGSKINVK.[V]_                              | P0C0L4     |         |              |          |         |          |         |              |          |         |          |         |              |          |         |          |         |              |          |         |          |
| [E].LQFSLGSKINVKVGGNSKGLTK.[V]_                    | P0C0L4     |         |              |          |         |          |         |              |          |         |          | 18803   | 19040        |          | 20375   | 17978    |         |              |          |         |          |
| [E].MAENGKVTITS.[V]_                               | Q99541     |         |              |          |         |          |         |              |          |         |          | 58279   | 69701        | 38699    | 52475   | 41715    |         |              |          |         |          |
| [E].NALTKSELLVEQ.[Y]_                              | Q99541     |         |              |          |         |          |         |              |          |         |          | 23026   |              |          | 12728   |          |         |              |          |         |          |
| [E].NALTKSELLVEQY.[L]_                             | Q99541     |         |              |          |         |          |         |              |          |         |          | 58894   | 55788        | 46028    | 49760   | 23802    |         |              |          |         |          |
| [E].NDERPFYQ.[K]_                                  | P07498     |         |              |          |         |          | 107899  | 78092        |          | 62438   | 36477    | 66167   | 78224        | 50065    | 40322   | 36606    |         |              |          |         |          |
| [E].NDERPFYQK.[T]_                                 | P07498     |         |              |          |         |          | 74408   | 63430        | 122089   | 80920   | 57487    |         | 71176        | 42747    | 73579   | 51542    |         |              |          |         |          |
| [E].NGVKTITSVAM.[T]_                               | Q99541     |         |              |          |         |          |         |              |          |         |          |         |              |          |         |          |         |              |          |         |          |
| [E].NGVKTITSVAMTS.[A]_                             | Q99541     |         |              |          |         |          |         |              |          |         |          | 62846   | 74613        | 106973   | 41642   |          |         |              |          |         |          |
| [E].NLHLPLPLL.[Q]_                                 | P05814     |         |              |          |         |          |         |              |          |         |          | 179796  | 172397       | 105717   | 126990  | 63797    |         |              |          |         |          |
| [E].NLHLPLPLLQ.[P]_                                | P05814     |         |              |          |         |          |         |              |          |         |          |         |              |          | 48133   | 144882   | 328926  |              |          |         | 36508    |
| [E].NLHLPLPLLQPLM.[Q]_                             | P05814     |         |              |          |         |          |         |              |          |         |          |         |              |          |         | 63241    | 134460  |              |          |         |          |
| [E].NLHLPLPLLQPLMQ.[Q]_                            | P05814     |         |              |          |         |          |         |              |          |         |          |         |              |          |         | 149627   | 254559  |              |          |         | 170847   |
| [E].NLHLPLPLLQPLMQQVQPPIQPT.[L]_                   | P05814     |         |              |          |         |          | 50510   |              |          |         | 84242    | 58810   |              | 70928    | 124961  | 392125   |         |              |          |         |          |
| [E].NLHLPLPLLQPLMQQVQPPIQPTL.[A]_                  | P05814     |         |              |          |         |          | 256777  | 210684       |          | 159079  | 93129    | 196319  | 162868       | 202489   | 188357  | 225596   |         |              |          |         |          |
| [E].NLHLPLPLLQPLMQQVQPPIQPTLALPPQP.[L]_            | P05814     |         |              |          |         |          |         |              |          |         |          | 69063   | 52017        | 68004    | 86834   | 207049   |         |              |          |         |          |
| [E].NLPQVDPNNEAIRN.[A]_                            | P55036     |         |              |          |         |          | 186581  | 165811       | 110577   |         | 13292    | 39927   | 43948        | 57890    | 24331   | 15489    |         |              |          |         |          |
| [E].NPQPHPGWQG.[T]_                                | P19835     |         |              |          |         |          | 429272  | 271443       | 87166    | 220984  | 143985   | 90749   | 61315        | 62015    | 87460   | 27948    |         |              |          |         |          |
| [E].NPQPHPGWGTL.[K]_                               | P19835     |         |              |          |         |          | 437141  | 465535       | 64379    | 244130  | 392409   |         |              |          |         |          |         |              |          |         |          |
| [E].NVEKNNVMLQW.[-I]_                              | P47710     |         |              |          |         |          |         |              |          |         |          | 45913   | 53053        | 59703    |         | 145133   | 10270   |              | 23188    | 57751   |          |
| [E].PIPLESREYMGNMNR.[Q]_1xOxidation [M]            | P47710     |         |              |          |         |          | 611569  | 591421       | 1182842  | 687285  | 289087   | 287299  | 336407       | 288588   | 348625  | 299198   |         |              |          |         |          |
| [E].PIPLESREYMGNMNRQ.[R]_                          | P47710     |         |              |          |         |          | 137464  | 134235       | 120596   | 172071  | 163937   | 21486   |              |          |         |          |         |              |          |         |          |
| [E].PIPYGFLPQNI.[L]_                               | P05814     |         |              |          |         |          | 73951   | 41646        | 323207   | 47217   | 53317    |         |              |          |         |          |         |              |          |         |          |
| [E].PIPYGFLPQNILPLA.[Q]_                           | P05814     |         |              |          |         |          | 58701   | 36713        |          |         |          |         |              |          |         |          |         |              |          |         |          |
| [E].PIPYGFLPQNILPLAQ.[P]_                          | P05814     |         |              |          |         |          | 168826  | 121836       | 198304   |         | 98830    |         |              |          |         |          |         |              |          |         |          |
| [E].PIPYGFLPQNILPLAQPAVVLPVPQPEIMEVPK.[A]_         | P05814     |         |              |          |         |          | 77790   | 94826        | 453008   | 151159  | 524429   |         |              |          |         |          |         |              |          |         |          |
| [E].PPQSPWDRVKDLATVYVDVLK.[D]_                     | P02647     |         |              |          |         |          |         |              |          |         |          |         |              |          |         |          |         |              |          |         |          |
| [E].QALQEMGLHLSQSKLMEDIKE.[V]_1xOxidation [M6]     | Q96T51     |         |              |          |         |          |         |              |          |         |          | 43192   | 60829        | 58450    | 55465   | 25610    |         |              |          |         |          |
| [E].QEAQMPYR.[G]_                                  | Q13410     |         |              |          |         |          |         |              |          |         |          |         |              |          |         |          |         | 45935        | 29981    | 28132   | 18676    |
| [E].QMPEYRGR.[A]_                                  | Q13410     |         |              |          |         |          |         |              |          |         |          |         |              |          |         |          |         |              |          |         |          |
| [E].RGEKLDLVSKEVLGTQ.[S]_                          | O15498     |         |              |          |         |          | 342557  | 424192       | 363563   | 152796  | 21465    |         |              |          |         |          |         |              |          |         |          |
| [E].RLQNPSSESSEPI.[L]_                             | P47710     |         |              |          |         |          | 514604  | 563188       | 415384   | 264155  | 278636   | 555348  | 618153       | 497605   | 400042  | 275638   | 266099  | 482682       | 454242   | 164877  | 72176    |
| [E].RLQNPSSESSEPIPL.[E]_                           | P47710     |         |              |          |         |          | 44764   | 51116        | 49413    | 36080   | 34564    |         |              |          |         |          |         |              |          |         |          |
| [E].RLQNPSSESSEPIPLS.[R]_                          | P47710     |         |              |          |         |          | 364409  | 409729       | 234862   | 143867  | 162725   | 231397  | 239730       | 215889   | 137411  | 57648    | 37750   | 53771        | 41112    | 36535   | 14785    |
| [E].RLQNPSSESSEPIPLSREE.[Y]_                       | P47710     |         |              |          |         |          | 135652  | 117400       | 75591    | 38025   | 85064    | 101719  | 135516       | 81881    | 103950  | 101340   |         |              |          |         |          |
| [E].RLQNPSSESSEPIPLSREEY.[M]_                      | P47710     |         |              |          |         |          | 92626   | 161330       | 83523    | 68184   | 55053    | 47464   | 75598        | 60760    | 49418   | 57761    | 29342   | 43319        | 43803    | 36434   |          |
| [E].RLQNPSSESSEPIPLSREEYMN.[G]_                    | P47710     |         |              |          |         |          | 53679   | 96338        |          | 44167   |          | 88869   | 75740        | 69025    | 45181   | 52242    | 158840  | 172023       | 209237   | 82437   | 104558   |
| [E].RLQNPSSESSEPIPLSREEYMN.[G]_1xOxidation [M21]   | P47710     |         |              |          |         |          |         |              |          |         |          |         |              |          |         |          |         |              |          |         |          |
| [E].RLQNPSSESSEPIPLSREEYMNMG.[M]_                  | P47710     |         |              |          |         |          | 108510  | 112918       | 172220   | 105103  | 155158   | 353493  | 328908       | 308213   | 277185  | 199327   | 51037   | 35188        | 51240    | 42081   |          |
| [E].RLQNPSSESSEPIPLSREEYMNMG.[N]_                  | P47710     |         |              |          |         |          | 228135  | 227088       | 179704   | 193390  | 146414   | 330028  | 266356       | 272024   | 305587  | 268121   |         | 41987        | 23335    | 26667   |          |
| [E].RLQNPSSESSEPIPLSREEYMNMGNR.[Q]_1xOxidation [M] | P47710     |         |              |          |         |          | 1421401 | 1310947      | 2312105  | 889598  | 319292   | 225913  | 304429       | 231546   | 268525  | 721202   |         | 28036        | 17731    | 167074  | 144718   |
| [E].RLQNPSSESSEPIPLSREEYMNMGNRQ.[R]_               | P47710     |         |              |          |         |          | 333587  | 301071       | 290113   | 204894  | 192806   | 142404  | 167113       | 161181   | 136538  | 159233   |         | 30736        | 11980    |         | 38778    |
| [E].SEELNGAYK.[A]_                                 | P10451     |         |              |          |         |          | 113613  | 72229        | 107560   |         | 107560   | 110359  | 110076       | 95043    | 132691  | 74059    |         |              |          |         |          |
| [E].SITEYKQKV.[E]_                                 | P05814     |         | 46529        | 32508    | 147664  | 63052    | 212194  | 228084       | 163529   | 258776  | 133656   | 390569  | 422895       | 369617   | 719801  | 587354   |         |              |          |         |          |
| [E].SLSSSESITEYKQV.[K]_                            | P05814     |         |              |          |         |          | 68851   | 73861        |          | 64913   | 75377    | 37378   | 43062        |          | 49451   | 67507    |         |              |          |         |          |
| [E].SLSSSESITEYKQKV.[E]_                           | P05814     |         |              |          |         |          |         |              |          |         |          | 152062  | 248817       | 287465   | 443879  | 386404   |         | 17162        |          |         | 46089    |
| [E].SPPPYRPDEFKPNH.[Y]_                            | Q16625     |         |              |          |         |          |         |              |          |         |          | 47512   | 55073        | 42822    | 40466   | 32019    |         |              |          |         |          |
| [E].SQNAQDQGAEMDKSSQETQR.[S]_                      | Q99541     |         |              |          |         |          |         |              |          |         |          | 57530   | 73641        | 78255    | 63576   | 25755    |         |              |          |         |          |
| [E].SREYMGNM.[N]_                                  | P47710     |         |              |          |         |          | 150920  | 111965       | 129991   | 232283  | 47520    | 142139  | 145048       | 83710    | 187009  | 90160    | 44761   | 136326       | 45221    |         |          |
| [E].SREYMGNM.[R]_1xOxidation [M]                   | P47710     |         |              |          |         |          | 143531  | 124330       | 294121   | 82933   | 35924    | 23739   | 23880        | 12463    | 44879   |          |         |              |          |         |          |
| [E].SREYMGNMNRQ.[R]_                               | P47710     |         |              |          |         |          | 52410   | 40787        | 97696    | 37375   | 9213     | 28655   | 45303        |          | 33434   |          |         |              |          |         |          |
| [E].SREYMGNMNRQ.[N]_                               | P47710     |         |              |          |         |          | 133477  | 91278        | 191939   | 117083  | 16761    | 38764   | 40511        | 29950    | 54475   | 49702    |         | 38749        |          |         |          |
| [E].SREYMGNMNRQRNII.[R]_                           | P47710     |         |              |          |         |          | 266685  | 227267       | 466329   | 341251  | 187088   | 39609   | 37028        | 40701    | 43201   | 74503    |         |              |          |         |          |
| [E].SSEPIPLSRE.[E]_                                | P47710     |         |              |          |         |          | 199942  | 176271       | 100423   | 212680  | 85789    | 53882   | 47306        |          | 66983   | 60646    |         |              |          |         |          |
| [E].SSEPIPLSREE.[Y]_                               | P47710     |         |              |          |         |          | 139700  | 100219       | 66789    | 180703  | 87686    |         |              |          |         |          |         |              |          |         |          |
| [E].SSEPIPLSREEY.[M]_                              | P47710     |         |              |          |         |          | 218202  | 143246       | 93579    | 416773  | 152742   |         |              |          |         |          |         |              |          |         |          |
| [E].SSEPIPLSREEYM.[N]_                             | P47710     |         |              |          |         |          | 254585  | 154076       | 193110   | 297707  | 246600   |         |              |          |         |          |         |              |          |         |          |
| [E].SSEPIPLSREEYMNMG.[N]_                          | P47710     |         |              |          |         |          | 176504  | 98101        | 206827   | 348491  | 101458   |         |              |          |         |          |         |              |          |         |          |
| [E].SSEPIPLSREEYMNMG.[R]_                          | P47710     |         |              |          |         |          | 2984446 | 2381422      | 2326736  | 3680806 | 4575260  | 298252  | 279307       | 322172   | 380320  | 329312   | 15453   |              |          |         | 33921    |
| [E].SSEPIPLSREEYMNMG.[R]_1xOxidation [M]           | P47710     |         |              |          |         |          | 300093  | 256618       | 450087   | 234133  | 233619   |         |              |          |         |          |         |              |          |         |          |
| [E].SSEPIPLSREEYMNMG.[R]_2xOxidation [M14; M17]    | P47710     |         |              |          |         |          |         |              |          |         |          |         |              |          |         |          |         |              |          |         |          |



| Quantified modified peptide sequence             | Protein ID | A_-80oC | A_-20oC_120h | A_4oC_6h | A_RT_6h | A_RT_24h | B_-80oC | B_-20oC_120h | B_4oC_6h | B_RT_6h | B_RT_24h | C_-80oC | C_-20oC_120h | C_4oC_6h | C_RT_6h | C_RT_24h | D_-80oC | D_-20oC_120h | D_4oC_6h | D_RT_6h | D_RT_24h |
|--------------------------------------------------|------------|---------|--------------|----------|---------|----------|---------|--------------|----------|---------|----------|---------|--------------|----------|---------|----------|---------|--------------|----------|---------|----------|
| [F].RRPDIQYPDATD.[E]_                            | P10451     |         |              |          |         |          | 478438  | 368497       | 216975   | 612816  | 339445   | 218307  | 149426       | 116744   | 202373  | 179927   |         |              |          |         |          |
| [F].RRPDIQYPDATDEDIT.[S]_                        | P10451     |         |              |          |         |          | 60942   | 85644        |          |         |          | 221583  | 224494       | 143137   | 86415   | 50171    |         |              |          |         |          |
| [F].RRPDIQYPDATDEDITSH.[M]_                      | P10451     |         |              |          |         |          | 214542  | 213808       | 114965   | 88277   | 32955    | 660986  | 680173       | 530652   | 237311  | 142395   | 16720   | 57744        | 32265    | 21961   | 13444    |
| [F].RRPDIQYPDATDEDITSHMESEELNGA.[Y]_             | P10451     |         |              |          |         |          |         |              |          |         |          | 27054   | 101729       | 16654    |         | 28883    |         |              |          |         |          |
| [F].SDISNPATAHENYEKNNVMLQW.[-]_                  | P47710     |         |              |          |         |          |         |              |          |         |          |         |              |          |         |          |         |              |          |         |          |
| [F].SDISNPATAHENYEKNNVMLQW.[-]_1xOxidation [M18] | P47710     |         |              |          |         |          |         |              |          |         |          |         |              |          |         |          |         |              |          |         |          |
| [F].SEYASVQVPRK.[-]_                             | P78324     |         |              |          |         |          |         |              |          |         |          |         |              |          |         |          | 21361   | 36779        | 37231    |         | 99551    |
| [F].SGMNSVSIQNMOSKGGYGGGMPANVQMQLVDTKAG.[-]_     | Q9NRR3     |         |              |          |         |          |         |              |          |         |          | 70003   | 76150        | 51673    | 56311   | 33402    |         |              |          |         | 28745    |
| [F].SLGSKINVKVGGNSKGT.[L]_                       | P0C0L4     |         |              |          |         |          |         |              |          |         |          | 97826   | 127024       | 118442   | 61939   | 55190    |         | 28699        | 15992    |         |          |
| [F].SLGSKINVKVGGNSKGT.L.[K]_                     | P0C0L4     |         |              |          |         |          |         |              |          |         |          | 27227   | 34826        | 28305    | 30058   | 24758    |         |              |          |         |          |
| [F].SLGSKINVKVGGNSKGT.LK.[V]_                    | P0C0L4     |         |              |          |         |          |         |              |          |         |          | 67594   | 91183        | 63345    | 51648   | 47326    |         |              |          |         |          |
| [F].VEGVNKKLG.[L]_                               | P19835     |         |              |          |         |          |         |              |          |         |          | 44608   | 73025        | 50997    | 46623   | 50626    |         |              |          |         |          |
| [F].VEPIPYGFLPQNILPAQPAVVLVPVQPEI.[M]_           | P05814     |         |              |          |         |          | 34927   | 31792        |          | 38153   | 46471    |         |              |          |         |          |         |              |          |         |          |
| [G].AGSTTVKIVLK.[E]_                             | Q6WVN34    |         |              |          |         | 40846    | 65850   | 64920        |          | 140139  | 137852   | 69050   | 38093        | 53250    | 44422   | 22211    |         |              |          |         |          |
| [G].AKTTFDVYTESWAQDPSQEN.[K]_                    | P19835     |         |              |          |         |          |         |              |          | 22180   | 99055    |         |              |          |         |          |         |              |          |         |          |
| [G].AKTTFDVYTESWAQDPSQENK.[K]_                   | P19835     |         |              |          |         | 80358    | 73853   | 69056        |          | 293190  | 346415   |         |              |          |         |          |         |              |          |         |          |
| [G].DIGKWLPNGTLK.[I]_                            | P33121     |         |              |          |         |          |         |              |          |         |          |         |              |          |         |          |         |              |          |         |          |
| [G].DIVIDKMGTVQK.[G]_                            | P46778     |         |              |          |         |          | 23759   | 18490        |          |         | 31112    | 25255   | 39149        |          | 45232   | 42550    |         |              |          |         |          |
| [G].DLPYDGRLLLEEAVRK.[K]_                        | Q86X29     |         |              |          |         |          |         |              | 62455    | 123626  | 196030   |         |              |          |         |          |         |              |          |         |          |
| [G].DPNMGDSAVPTHW.[E]_                           | P19835     |         |              |          | 57523   | 44135    | 45252   | 32294        |          | 33477   | 96712    |         |              |          |         |          |         |              |          |         |          |
| [G].DQTVSDNELQEMSNQGSK.[Y]_                      | P10909     |         |              |          |         |          | 80448   | 116431       | 96514    | 88734   | 79628    | 78026   | 76566        | 71209    | 66453   | 28203    |         |              |          |         |          |
| [G].DQTVSDNELQEMSNQGSKYVN.[K]_                   | P10909     |         |              |          |         |          |         |              |          |         |          | 59623   | 42298        | 58363    | 47177   | 36623    |         |              |          |         |          |
| [G].DQTVSDNELQEMSNQGSKYVNNK.[E]_                 | P10909     |         |              |          |         |          |         |              |          |         |          | 181108  | 175401       | 169358   | 106399  | 73722    |         |              |          |         |          |
| [G].DQTVSDNELQEMSNQGSKYVNNKEIQNAVNGV.[G]_        | P10909     |         |              |          |         |          | 96322   | 106875       | 165182   | 75956   | 107814   | 30819   |              | 17646    |         |          |         |              |          |         |          |
| [G].DQTVSDNELQEMSNQGSKYVNNKEIQNAVNGVK.[Q]_       | P10909     |         |              |          |         |          | 68092   | 48013        | 114653   |         | 42062    |         |              |          |         |          |         |              |          |         |          |
| [G].DSAVPTHWEPYTTENSGYEITKKMGSSSM.[K]_           | P19835     |         |              |          |         | 111766   | 168025  | 153283       |          | 124797  | 53553    |         |              | 66634    |         |          |         |              |          |         |          |
| [G].DSVDIFKG.[I]_                                | P19835     |         |              |          |         |          | 52061   | 58669        |          | 71750   | 131596   |         |              |          |         |          |         |              |          |         |          |
| [G].EDEHQDKIYP.[S]_                              | P05814     |         |              |          |         |          | 362583  | 367436       | 322462   | 416197  | 344008   |         |              |          |         |          |         |              |          |         |          |
| [G].EDEHQDKIYPSPQPQLIYPFVEPIPY.[G]_              | P05814     |         |              |          |         |          | 158031  | 152929       | 182951   | 179043  | 123214   |         |              |          |         |          |         |              |          |         |          |
| [G].EDSAPRADDTLHSLUPTQ.[P]_                      | Q13410     |         |              |          |         |          |         |              |          |         |          | 47498   | 51832        | 52020    | 41774   |          |         |              |          |         |          |
| [G].EIDYEAIKVL.[S]_                              | P62333     |         |              |          |         |          | 40070   | 27665        |          |         |          |         |              |          |         |          |         |              |          |         |          |
| [G].EVQAMLGQSTEELRRLASHL.[R]_                    | Q02649     |         |              |          |         |          | 39931   | 42440        |          |         |          |         |              |          |         |          |         |              |          |         |          |
| [G].FDLVQKPSYYVRLG.[S]_                          | Q99541     |         |              |          |         |          |         |              |          |         |          | 114138  | 124243       | 59988    | 59155   | 42204    | 29211   |              | 29099    |         |          |
| [G].FKSHALQLNNRQI.[R]_                           | P0C0L4     |         |              |          |         |          |         |              |          |         |          | 18559   |              | 28017    | 26524   | 22291    |         |              |          |         |          |
| [G].FPATASNDLK.[A]_                              | Q9UNQ0     |         |              |          |         |          |         |              |          |         |          | 53800   | 68476        | 69581    | 46917   | 26021    |         |              |          |         |          |
| [G].FVEGVNKK.[K]_                                | P19835     |         |              |          |         |          | 14753   | 18911        |          | 59673   | 43296    |         |              |          |         |          |         |              |          |         |          |
| [G].FVEGVNKK.[L]_                                | P19835     |         |              |          |         |          | 17149   | 28092        |          | 43186   | 13018    |         |              |          |         |          |         |              |          |         |          |
| [G].GFVEGVNKK.[L]_                               | P19835     |         |              |          |         |          | 43884   | 51802        |          | 98679   | 35479    |         |              |          |         |          |         |              |          |         |          |
| [G].GQQQQGPPPPQGGKPKQ.[G]_                       | P02810     |         |              |          |         |          |         |              |          |         |          |         |              |          |         |          |         |              |          |         |          |
| [G].GOYGNPLNKYI.[R]_                             | O14672     |         |              |          |         |          |         |              |          |         |          |         |              |          |         |          |         |              |          |         |          |
| [G].GVQSVMSRLG.[Q]_                              | O60664     |         |              |          |         |          |         |              |          |         |          |         |              |          |         |          |         |              |          |         |          |
| [G].HLQSLQRUIDSQMETSCQITFE.[F]_1xOxidation [M13] | P09603     |         |              |          |         |          | 60235   | 64883        | 129222   | 86580   | 64131    |         |              |          |         |          |         |              |          |         |          |
| [G].IGLVKGGVSAVAGGVTA VG.[S]_                    | Q8WUH6     |         |              |          |         |          |         |              |          |         |          | 87727   | 95873        | 44311    | 61957   | 28652    |         |              |          |         |          |
| [G].IGLVKGGVSAVAGGVTA VGSAAVNN.[K]_              | Q8WUH6     |         |              |          |         |          |         |              |          |         |          | 119756  | 161275       | 148174   | 91478   | 48999    |         |              |          |         |          |
| [G].IPFAAPT KALE.[N]_                            | P19835     |         |              |          |         |          | 254398  | 173946       |          | 75227   | 106993   |         |              |          |         |          |         |              |          |         |          |
| [G].IPFAAPT KALENPQPHP.[G]_                      | P19835     |         |              |          |         |          | 70498   | 87313        |          | 49620   | 31246    |         |              |          |         |          |         |              |          |         |          |
| [G].IPFAAPT KALENPQPHPG.[W]_                     | P19835     |         |              |          |         |          | 155691  | 114676       |          | 62469   | 40094    |         |              |          |         |          |         |              |          |         |          |
| [G].IPFAAPT KALENPQHPGWQG.[T]_                   | P19835     |         |              |          |         |          | 241272  | 234489       | 203641   | 137843  | 83120    |         |              |          |         |          |         |              |          |         |          |
| [G].IPFAAPT KALENPQHPGWQGT LK.[A]_               | P19835     |         |              |          |         |          | 144726  | 161221       | 160089   | 90911   |          |         |              |          |         |          |         |              |          |         |          |
| [G].IPPSGPAGELKFEPHI.[-]_                        | P80303     |         |              |          |         |          | 29819   | 36315        |          | 109233  | 346814   |         |              |          |         |          |         |              |          |         |          |
| [G].KPFATPTGYRPOD.[R]_                           | P19835     |         |              |          |         |          | 123768  | 155034       | 236485   | 193225  | 303229   |         |              |          |         |          |         |              |          |         |          |
| [G].KPGDQILDWQYGV TQ.[A]_                        | Q6UX71     |         |              |          |         |          |         | 25339        | 119762   | 25796   | 20056    | 148702  | 51992        | 46136    | 99899   | 80482    | 222222  | 238758       |          |         |          |
| [G].KPGDQILDWQYGV TQAFPHTEE.[E]_                 | Q6UX71     |         |              |          |         |          |         |              |          |         |          |         |              |          |         |          |         |              |          |         |          |
| [G].KSGKQGEKGR TGA KAGYQ.[G]_                    | Q8IZC6     |         |              |          |         |          |         | 105348       |          | 58886   | 37336    |         |              |          |         |          |         |              |          |         |          |
| [G].LLGDSVDIFK.[G]_                              | P19835     |         |              |          |         |          | 36303   | 40108        |          | 53410   |          |         |              |          |         |          |         |              |          |         |          |
| [G].LPFYNGFYYSNSANDQNLNGH G.[K]_                 | Q96586     |         |              |          |         | 47079    | 68561   | 72470        |          | 106037  | 178549   |         |              |          |         |          |         |              |          |         |          |
| [G].NEIDAQN PQIKRITDKADTN.[R]_                   | O00161     |         |              |          |         |          |         |              |          |         |          | 32402   | 27317        | 25000    |         |          |         |              |          |         |          |
| [G].NPLNKYI.[R]_                                 | O14672     |         |              |          |         |          | 54936   | 59032        |          | 46231   | 18079    |         |              |          |         |          |         |              |          |         |          |
| [G].NTNGFPATASNDLK.[A]_                          | Q9UNQ0     |         |              |          |         |          |         | 154209       |          | 24080   | 16348    |         |              |          |         |          |         |              |          |         |          |
| [G].RATLVQDGI AK.[G]_                            | Q13410     |         |              |          |         |          |         |              |          |         |          |         |              |          |         |          |         |              |          |         |          |
| [G].REQEAEQMPEY.[R]_                             | Q13410     |         |              |          |         |          |         |              |          |         |          |         |              |          |         |          |         |              |          |         |          |
| [G].REQEAEQMPEYR.[G]_                            | Q13410     |         |              |          |         |          |         |              |          |         |          |         |              |          |         |          |         |              |          |         |          |
| [G].REQEAEQMPEYRGR.[A]_                          | Q13410     |         |              |          |         |          |         |              |          |         |          |         |              |          |         |          |         |              |          |         |          |
| [G].RVMPVLKSPT.[I]_                              | P05814     |         |              |          |         |          | 252033  | 187916       |          | 202933  | 192431   | 67422   | 102362       | 48024    | 91449   | 168673   |         |              |          |         |          |
| [G].RVMPVLKSPTIP.[F]_                            | P05814     |         |              |          |         |          | 129663  | 117765       | 100405   | 158306  | 306639   | 274571  | 335644       | 223814   | 360683  | 747698   |         |              |          |         |          |
| [G].SINTVLGSRMM.[Q]_                             | Q99541     |         |              |          |         |          |         |              |          |         |          | 140891  | 204223       | 31860    | 120755  | 61393    |         |              |          |         |          |
| [G].SLSTKLH SRAYQ.[Q]_                           | Q99541     |         |              |          |         |          |         |              |          |         |          | 163151  | 195098       | 72082    | 76147   | 27810    | 33000   | 16519        | 16162    | 35328   |          |
| [G].SLSTKLH SRAYQQA.[L]_                         | Q99541     |         |              |          |         |          |         |              |          |         |          | 393625  | 563095       | 284930   | 275205  | 148289   |         |              |          |         |          |
| [G].SRASVDSGSSEEQGGSSRALVST.[L]_                 | P01833     |         |              |          |         |          |         |              |          |         |          | 76820   | 58836        | 15448    | 72548   | 49671    |         |              |          |         |          |
| [G].SRASVDSGSSEEQGGSSRALVSTLVPLG.[L]_            | P01833     |         |              |          |         |          |         |              |          |         |          | 1004581 | 1146799      | 1046832  | 887482  | 481367   | 27588   | 45369        | 34590    | 41408   | 27706    |
| [G].SRMMQLVSSGVENALT.[K]_                        | Q99541     |         |              |          |         |          |         |              |          |         |          | 44948   |              |          |         |          | 592056  | 723839       | 536307   | 413025  | 351984   |
| [G].SRMMQLVSSGVENALT K.[S]_                      | Q99541     |         |              |          |         |          |         |              |          |         |          | 141008  | 119215       | 60519    | 107852  | 49673    |         |              |          |         |          |
| [G].SRMMQLVSSGVENALT KSELL.[V]_                  | Q99541     |         |              |          |         |          |         |              |          |         |          | 65264   | 50524        |          | 63437   |          |         |              |          |         |          |
| [G].SSEEQGGSSRALVSTLVPLG.[L]_                    | P01833     |         |              |          |         |          | 84960   | 100066       | 66886    | 59422   |          | 275362  | 318528       | 415841   | 213129  | 76104    | 67963   | 78302        | 62943    |         | 37039    |



| Quantified modified peptide sequence              | Protein ID | A_80oC | A_-20oC_120h | A_4oC_6h | A_RT_6h | A_RT_24h | B_-80oC | B_-20oC_120h | B_4oC_6h | B_RT_6h | B_RT_24h | C_-80oC | C_-20oC_120h | C_4oC_6h | C_RT_6h | C_RT_24h | D_-80oC | D_-20oC_120h | D_4oC_6h | D_RT_6h | D_RT_24h |       |
|---------------------------------------------------|------------|--------|--------------|----------|---------|----------|---------|--------------|----------|---------|----------|---------|--------------|----------|---------|----------|---------|--------------|----------|---------|----------|-------|
| [I].PASSLPRLT.[P]_                                | Q13410     |        |              |          |         |          | 63569   | 70245        |          |         |          |         |              |          |         |          |         |              |          |         |          |       |
| [I].PASSLPRLTPWIV.[A]_                            | Q13410     |        |              |          |         |          |         |              |          |         |          |         |              |          |         |          |         |              |          |         |          |       |
| [I].PASSLPRLTPWIVA.[V]_                           | Q13410     |        |              |          |         |          |         | 131071       |          |         |          |         |              |          |         |          |         | 24323        |          | 26267   |          |       |
| [I].PFAAPT.KALENPQHPGWQG.[T]_                     | P19835     |        |              |          |         |          | 48502   | 55267        |          | 52665   | 60212    |         |              |          |         |          |         |              |          |         |          |       |
| [I].PFFDPQIPKL.[T]_                               | P05814     |        |              |          |         |          | 62891   |              |          |         | 58526    | 191562  | 150955       | 200401   | 338060  | 850921   |         | 10978        |          | 37105   |          |       |
| [I].PFFDPQIPKLT.D.[L]_                            | P05814     |        |              |          |         |          |         |              |          |         |          |         |              |          |         | 70489    |         |              |          |         |          |       |
| [I].PFFDPQIPKLT.DLENLHL.[P]_                      | P05814     |        |              |          |         |          |         |              |          |         |          |         |              |          | 14471   | 30717    |         |              |          |         |          |       |
| [I].PFFDPQIPKLT.DLENLHLPL.[P]_                    | P05814     |        |              |          |         |          |         |              |          |         |          |         |              |          |         |          |         |              |          |         |          |       |
| [I].PFFDPQIPKLT.DLENLHLPL.L.[L]_                  | P05814     |        |              |          |         |          |         |              |          |         |          |         |              |          |         | 16695    | 27841   |              |          |         |          |       |
| [I].PFFDPQIPKLT.DLENLHLPL.LLQP.[L]_               | P05814     |        |              |          |         |          |         |              |          |         |          |         |              |          |         |          |         |              |          |         |          |       |
| [I].PKLT.DLENLHLPL.[L]_                           | P05814     | 33559  |              |          |         | 70937    | 139031  | 162459       | 100537   | 149158  | 212399   | 314687  | 270610       | 297708   | 330679  | 227981   |         |              |          |         |          |       |
| [I].PLESREEY.MNGMN.[R]_                           | P47710     |        | 54347        |          |         | 409148   | 1088311 | 1221778      | 2543094  | 1716515 | 1775998  | 151604  | 137756       | 147104   | 117035  | 110402   | 22279   | 11022        | 18993    | 14587   |          |       |
| [I].PLESREEY.MNGMN.[R]_2xOxidation [M9; M12]      | P47710     |        |              |          |         |          | 57385   | 52521        | 417802   | 47914   | 45043    |         |              |          |         |          |         |              |          |         |          |       |
| [I].PLESREEY.MNGMNR.[Q]_1xOxidation [M]           | P47710     |        | 32268        | 64748    |         | 261985   | 4091607 | 4736506      | 8862038  | 7637081 | 3657136  | 2140050 | 2371432      | 2174194  | 2079302 | 2357252  | 72572   | 130936       | 100399   | 103979  |          |       |
| [I].PLESREEY.MNGMNR.[Q]_1xOxidation [M]           | P47710     |        |              |          |         | 20877    | 795849  | 1329738      | 7681001  | 1951250 | 491603   |         |              |          |         |          |         |              |          |         |          |       |
| [I].PLESREEY.MNGMNR.[Q]_2xOxidation [M9; M12]     | P47710     |        |              |          |         |          | 47362   | 36613        | 308101   | 74528   |          |         |              |          |         |          |         |              |          |         |          |       |
| [I].PLESREEY.MNGMNR.Q.[R]_                        | P47710     |        |              |          |         |          | 326402  | 443114       | 1721633  | 884182  | 739571   |         |              |          |         | 33242    |         |              |          |         |          |       |
| [I].PLESREEY.MNGMNR.QR.[N]_                       | P47710     |        |              |          |         |          | 121728  | 36328        | 156790   | 172869  | 33344    |         |              |          |         |          |         |              |          |         |          |       |
| [I].PLESREEY.MNGMNR.QRNL.[R]_                     | P47710     |        |              |          |         |          | 60141   | 65477        | 111742   | 75969   |          |         |              |          |         |          |         |              |          |         |          |       |
| [I].PLSPMGEDSAPRDADTLHSK.[L]_                     | Q13410     |        |              |          |         |          |         |              |          |         |          |         |              |          |         |          |         |              |          |         |          |       |
| [I].PLSPMGEDSAPRDADTLHSKLPTQ.[P]_                 | Q13410     |        |              |          |         |          |         |              |          |         |          | 63297   | 43010        | 45784    | 41668   | 36555    |         |              |          |         |          |       |
| [I].PQQVVPYPQRAVPVQ.[A]_                          | P05814     |        |              |          |         |          |         |              |          |         | 27469    |         | 122881       | 52040    | 29697   | 152331   |         |              |          |         |          |       |
| [I].PQQVVPYPQRAVPVQA.[L]_                         | P05814     |        |              |          |         |          |         |              |          |         |          |         |              |          |         |          |         |              |          |         |          |       |
| [I].PQTLAI.PPQPLWSVPQK.[V]_                       | P05814     | 35580  |              |          |         | 74011    | 41490   | 52664        | 41332    | 98649   |          | 36768   |              | 47578    | 34910   | 64916    |         |              |          |         |          |       |
| [I].PTAPPSHT.GRHL.[W]_                            | Q9NZHO     |        |              |          |         |          | 44865   | 38436        | 249764   | 83611   | 163210   |         |              |          |         |          |         |              |          |         |          |       |
| [I].PVAQDLNAPSDWDSR.[G]_                          | P10451     |        |              |          |         |          | 71378   | 108092       | 140394   | 378833  |          | 32218   | 61466        | 58725    | 40332   | 26831    |         |              |          |         |          |       |
| [I].PVAQDLNAPSDWDSRGK.[D]_                        | P10451     |        |              |          |         |          | 67560   | 90813        | 70985    | 122196  | 236222   | 33517   | 33210        | 32685    | 29426   | 85108    |         |              |          |         |          |       |
| [I].PVAQDLNAPSDWDSRGKD.[S]_                       | P10451     |        |              |          |         |          | 43079   |              |          | 71203   | 42396    |         |              |          |         |          |         |              |          |         |          |       |
| [I].PVAQDLNAPSDWDSRGKDS.[Y]_                      | P10451     |        |              |          |         |          | 687796  | 632140       | 236011   | 189794  | 134362   | 2552025 | 2613029      | 2822872  | 2266860 | 1925428  |         |              |          |         |          |       |
| [I].PVAQDLNAPSDWDSRGKDSYETS.[Q]_                  | P47710     |        |              |          |         |          |         |              |          |         |          |         |              |          |         |          | 48366   |              |          |         |          |       |
| [I].PVKQADSGSSEKQL.[Y]_                           | P10451     |        |              |          |         |          |         |              |          |         |          | 25372   |              |          | 20509   |          |         |              |          |         |          |       |
| [I].PVKQADSGSSEKQL.[N]_                           | P10451     |        |              |          |         |          |         |              |          |         |          | 130136  | 106434       | 96811    | 107635  | 75900    |         |              |          |         |          |       |
| [I].PYGFLPQNILP.LAQPAVLPVPQPEIMEVPKADTVYT.[K]_    | P05814     |        |              |          |         | 153686   | 216395  | 68456        | 1682049  | 146386  | 335589   |         |              |          |         |          |         |              |          |         |          |       |
| [I].QDPRLFAEEKAVAD.[T]_                           | P01833     |        |              |          |         |          |         |              |          |         |          |         |              |          |         |          |         |              |          |         |          |       |
| [I].QDPRLFAEEKAVADTRDQ.[A]_                       | P01833     |        |              |          |         |          |         |              |          |         |          |         |              |          |         |          |         |              |          |         |          |       |
| [I].QDPRLFAEEKAVADTRDQADG.[S]_                    | P01833     |        |              |          |         |          |         |              |          |         |          | 211376  | 192450       | 168617   | 166389  | 89565    | 50348   | 54688        | 55556    | 31817   | 19221    |       |
| [I].QYPDATDEDITSH.[M]_                            | P10451     |        |              |          |         |          |         |              |          |         |          | 108761  | 91760        | 89427    | 97748   |          | 108253  | 114329       | 111398   | 56582   | 48990    |       |
| [I].RGLEEFELQFSLGSKINVK.[V]_                      | POCOL4     |        |              |          |         |          |         |              |          |         |          | 63806   | 57132        | 48381    | 38815   | 15328    | 34067   | 36071        | 27511    | 22202   |          |       |
| [I].SIPASSLPRLTPWIVAVA.[V]_                       | Q13410     |        |              |          |         | 22934    |         |              |          |         |          |         |              |          |         |          |         |              |          |         |          |       |
| [I].SNPTAHENVEKNN.[V]_                            | P47710     |        |              |          |         |          |         |              |          |         |          |         |              |          |         |          |         |              |          |         |          |       |
| [I].SPDLAKLN.[Q]_                                 | Q15365     |        |              |          |         |          | 27326   | 35426        |          |         |          |         |              |          |         |          |         | 61602        | 48256    | 48799   | 50574    | 31785 |
| [I].SPVEESEDVSNKVS.[M]_                           | P31431     |        |              |          |         |          |         |              |          |         |          |         |              |          |         |          |         |              |          |         |          |       |
| [I].SVGVDDTQFVR.[F]_                              | P13747     |        |              |          |         |          |         |              |          |         |          | 103626  | 95038        | 109168   | 90762   | 56824    | 62731   | 55475        | 56733    | 55883   | 34641    |       |
| [I].TEYKQKVEK.[V]_                                | P05814     |        |              |          |         |          |         |              |          |         |          |         |              |          |         |          |         |              |          |         |          |       |
| [I].YPFVEPIPYGFLPQ.[N]_                           | P05814     |        |              |          |         |          | 351141  | 508579       | 288419   | 662975  | 389514   | 237708  | 141281       | 81196    | 222484  | 138016   |         |              |          |         |          |       |
| [I].YPFVEPIPYGFLPQNIL.[P]_                        | P05814     |        |              |          |         |          | 67251   | 62001        |          | 35367   |          |         |              |          |         |          |         |              |          |         |          |       |
| [I].YPFVEPIPYGFLPQNILPL.[P]_                      | P05814     |        |              |          |         |          | 269071  | 145666       |          | 130530  | 124160   | 35437   | 33813        | 54075    | 91886   | 87178    |         |              |          |         |          |       |
| [I].YPFVEPIPYGFLPQNILPL.L.[L]_                    | P05814     |        |              |          |         |          | 31745   | 27072        |          | 25397   | 58208    |         |              |          |         |          |         |              |          |         |          |       |
| [I].YPFVEPIPYGFLPQNILPLA.[Q]_                     | P05814     |        |              |          |         |          | 147419  | 162043       | 85631    | 78283   | 48115    | 351218  | 305607       | 211610   | 188229  | 136004   |         | 32504        | 24567    |         | 23567    |       |
| [I].YPFVEPIPYGFLPQNILPLAQP.[A]_                   | P05814     |        |              |          |         |          | 71304   | 95971        | 161537   | 39948   | 28870    |         |              |          |         |          |         |              |          |         |          |       |
| [I].YPFVEPIPYGFLPQNILPLAQP.VVLPVPQPEI.[M]_        | P05814     |        |              |          |         |          | 137255  | 116517       | 130090   | 73914   |          | 86714   | 77002        | 50570    | 88554   | 55208    |         |              |          |         |          |       |
| [I].YPFVEPIPYGFLPQNILPLAQP.VVLPVPQPEIMEVPKAK.[D]_ | P05814     |        |              |          |         |          | 151071  |              | 143983   |         |          | 70900   |              |          |         |          |         |              |          |         |          |       |
| [I].YPSFQPQLI.[Y]_                                | P05814     |        |              |          |         |          | 213934  | 174009       | 83187    | 126914  | 147751   |         |              |          |         |          |         |              |          |         |          |       |
| [I].YPSFQPQLI.YPFVEPIPYG.[F]_                     | P05814     |        |              |          |         |          |         |              |          |         |          | 105247  | 120753       | 126465   | 207991  | 147922   |         |              |          |         |          |       |
| [I].YPSFQPQLI.YPFVEPIPYG.[L]_                     | P05814     |        |              |          |         |          |         |              |          |         |          | 39899   | 33461        | 51129    | 52518   | 83214    |         |              |          |         |          |       |
| [I].YPSFQPQLI.YPFVEPIPYGFLPQNILP.[L]_             | P05814     |        |              |          |         |          |         |              |          |         |          | 43577   | 78043        | 58995    | 72162   | 38914    |         |              |          |         |          |       |
| [I].YPSFQPQLI.YPFVEPIPYGFLPQNILPLA.[Q]_           | P05814     |        |              |          |         |          | 133590  | 117933       | 114257   | 33044   | 77519    | 59877   | 115555       | 92661    | 52919   | 23030    |         |              |          |         |          |       |
| [I].YPSFQPQLI.YPFVEPIPYGFLPQNILPLA.Q.[P]_         | P05814     |        |              |          |         |          |         |              |          |         |          | 155623  | 179051       | 181985   | 106959  | 38890    |         |              |          |         |          |       |
| [I].YPSFQPQLI.YPFVEPIPYGFLPQNILPLAQA.[V]_         | P05814     |        |              |          |         |          | 164885  |              |          | 63192   | 8376     |         |              |          |         |          |         |              |          |         |          |       |
| [I].YPTVQLAPVHNP.[I]_                             | P05814     |        |              |          |         |          |         |              |          |         |          | 51929   | 111855       | 50225    | 37217   |          |         |              |          |         |          |       |
| [K].AAMPNSQNATISVPPLTSVSVKPKL.[G]_                | Q8N9U0     |        |              |          |         |          | 59343   | 51705        | 69374    | 26252   | 59438    |         |              |          |         |          |         |              |          |         |          |       |
| [K].ADTRKM.DPSPSSNVAGVVIIV.[I]_                   | P22897     |        |              |          |         |          |         |              |          |         |          |         |              |          |         |          |         |              |          |         |          |       |
| [K].AIGY.LNTGVQR.[Q]_                             | P01023     |        |              |          |         |          |         |              |          |         |          |         |              |          |         |          |         |              |          |         |          |       |
| [K].AIPVAQDLNAPS.[D]_                             | P10451     |        |              |          |         |          | 149730  | 163215       | 54160    | 42363   | 14694    | 59862   | 54414        | 54857    | 31793   | 16324    |         |              |          |         |          |       |
| [K].AIPVAQDLNAPSD.[W]_                            | P10451     |        |              |          |         |          | 138719  | 148724       | 74766    | 209928  | 172851   |         |              |          |         |          |         |              |          |         |          |       |
| [K].AIPVAQDLNAPSDWDSR.[G]_                        | P10451     |        |              |          |         |          | 275354  | 305992       | 241092   | 430424  | 351248   | 128307  | 134599       | 117271   | 87230   | 45051    |         |              |          |         |          |       |
| [K].AIPVAQDLNAPSDWDSRGK.[D]_                      | P10451     |        |              |          |         |          |         |              |          | 72900   | 44061    |         |              |          |         |          |         |              |          |         |          |       |
| [K].AIPVAQDLNAPSDWDSRGKD.[S]_                     | P10451     |        |              |          |         |          | 35538   |              | 53981    | 30840   |          |         |              |          |         |          |         |              |          |         |          |       |
| [K].AIPVAQDLNAPSDWDSRGKDS.[Y]_                    | P10451     |        |              |          |         |          | 1270986 | 1078997      | 617389   | 190628  | 95132    | 4084556 | 4025281      | 4109876  | 2811443 | 1727643  |         |              |          |         |          |       |
| [K].AIPVAQDLNAPSDWDSRGKDSYETS.[Q]_                | P10451     |        |              |          |         |          |         |              |          |         |          |         |              |          |         |          |         |              |          |         |          |       |
| [K].AIPVAQDLNAPSDWDSRGKDSYETSQ.[L]_               | P10451     |        |              |          |         |          |         |              |          |         |          | 67140   | 88663        | 85965    | 61758   | 56036    |         |              |          |         |          |       |
| [K].AIPVAQDLNAPSDWDSRGKDSYETSQ.L.[D]_             | P10451     |        |              |          |         |          | 332779  | 346669       | 337872   | 362415  | 409308   | 328309  | 323040       | 327679   | 352249  | 514929   |         |              |          |         |          |       |
| [K].AIPVAQDLNAPSDWDSRGKDSYETSQ.LD.[D]_            | P10451     |        |              |          |         |          |         |              |          |         |          | 201804  | 192277       | 203378   | 194056  | 204916   |         |              |          |         |          |       |
| [K].AIQDPRLFAEE.[K]_                              | P01833     |        |              |          |         |          | 101008  | 74750        | 95962    | 80495   | 46699    | 123635  | 105560       | 68992    | 70075   | 28048    | 149042  | 151988       | 155173   | 55068   | 20087    |       |
| [K].AIQDPRLFAEKA.[V]_                             | P01833     |        |              |          |         |          | 181464  | 77090        |          | 255069  | 163490   | 18724   | 32510        | 35249    | 13078   | 15882    |         |              |          |         |          |       |

[illegible]



| Quantified modified peptide sequence                         | Protein ID | A_80oC | A_20oC_120h | A_4oC_6h | A_RT_6h | A_RT_24h | B_80oC | B_20oC_120h | B_4oC_6h | B_RT_6h | B_RT_24h | C_80oC  | C_20oC_120h | C_4oC_6h | C_RT_6h | C_RT_24h | D_80oC  | D_20oC_120h | D_4oC_6h | D_RT_6h | D_RT_24h |        |
|--------------------------------------------------------------|------------|--------|-------------|----------|---------|----------|--------|-------------|----------|---------|----------|---------|-------------|----------|---------|----------|---------|-------------|----------|---------|----------|--------|
| [K].LTDLENLHLP.LPL.LQPLM.[Q]_1xOxidation [M18]               | P05814     |        |             |          |         |          | 111835 | 74534       |          | 114937  | 142822   |         |             |          |         |          |         |             |          |         |          |        |
| [K].LTDLENLHLP.LPL.LQPLMQ.[Q]_1xOxidation [M18]              | P05814     |        |             |          |         |          |        |             |          |         |          | 21740   | 51168       | 51076    | 94887   | 129181   |         |             |          |         |          |        |
| [K].LTDLENLHLP.LPL.LQPLMQQ.[V]_                              | P05814     |        |             |          |         |          |        |             |          |         |          |         | 31173       | 24042    | 19799   | 63431    |         |             |          |         |          |        |
| [K].LTDLENLHLP.LPL.LQPLMQQVPQPPIQTAL.[L]_                    | P05814     |        |             |          |         |          | 93732  | 80679       |          | 75054   |          |         |             | 53643    | 47237   |          |         |             |          |         |          |        |
| [K].LTDLENLHLP.LPL.LQPLMQQVPQPPIQTAL.[P]_                    | P05814     |        |             |          |         |          | 136347 | 123844      | 169954   | 126218  | 259539   | 29977   |             | 33912    | 33922   | 114923   |         |             |          |         |          |        |
| [K].LVSEFTITKGLRGAKTTFDVTESWAQDPSQEN.[K]_                    | P19835     |        |             |          |         |          |        |             |          | 46658   | 176891   |         |             |          |         |          |         |             |          |         |          |        |
| [K].LVSEFTITKGLRGAKTTFDVTESWAQDPSQENK.[K]_                   | P19835     |        |             |          |         |          | 52700  |             |          | 31353   | 69746    |         |             |          |         |          |         |             |          |         |          |        |
| [K].LYGSAGPPPTGEEDTAEKDEL.[-]                                | P11021     |        |             |          |         |          | 40673  |             | 82524    | 18864   | 11452    | 42850   | 25613       | 59299    | 61477   | 37373    |         |             |          |         |          |        |
| [K].NGLHSKVVSEQKDTLGNTQIKQ.[K]_                              | Q14512     |        |             |          |         |          | 83625  | 56354       | 157157   | 86353   | 84307    | 95024   | 116711      | 118645   | 99682   | 99927    |         |             |          |         |          |        |
| [K].NHPVRFSGDDEGRYLQETNKKVETY.[K]_                           | P12272     |        |             |          |         |          |        |             |          | 43974   | 102071   |         |             |          |         |          |         |             |          |         |          |        |
| [K].NNRPYAVSELAGHQTSAESWGTGR.[A]_                            | P36578     |        |             |          |         |          |        |             | 31246    | 29245   | 44539    |         |             |          |         |          |         |             |          |         |          |        |
| [K].NPKFMETVAEKALQ.[E]_                                      | P10909     |        |             |          |         |          | 56744  | 53198       |          | 54580   | 67985    | 18187   |             | 22866    | 22572   | 15582    |         |             |          |         |          |        |
| [K].NPKFMETVAEKALQEQY.[R]_                                   | P10909     |        |             |          |         |          | 74943  | 28102       | 60760    | 82416   | 134769   |         |             |          |         |          |         |             |          |         |          |        |
| [K].NPKFMETVAEKALQEQYR.[K]_                                  | P10909     |        |             |          |         |          |        |             |          |         |          | 42374   | 38899       | 33852    | 34720   |          |         |             |          |         |          |        |
| [K].PSYYVRLG.[S]_                                            | Q99541     |        |             |          |         |          |        |             |          |         |          | 265149  | 324981      | 267257   | 230702  | 75296    |         |             |          |         |          |        |
| [K].QKVEKVKHEDQQQGEDEHQDKIYP.[S]_                            | P05814     |        |             |          |         |          |        | 53015       | 147271   | 33712   | 28933    |         |             |          |         |          |         |             |          |         |          |        |
| [K].QLYNKYPDVAWTWLNPDPSQK.[Q]_                               | P10451     |        |             |          |         |          |        |             |          | 128277  | 426469   | 125732  | 141488      | 76771    | 58412   | 39729    |         |             |          |         |          |        |
| [K].QNLLAPQNAVSEETNDFK.[Q]_                                  | P10451     |        |             |          |         |          | 22985  | 27327       |          |         |          | 18393   | 20268       | 19570    | 21463   |          |         |             |          |         |          |        |
| [K].REEAPSLRPAPPPISGGGY.[R]_                                 | P02675     |        |             |          |         |          |        |             |          | 35240   | 37786    |         |             |          |         |          |         |             |          |         |          |        |
| [K].REEAPSLRPAPPPISGGGYR.[A]_                                | P02675     |        |             |          |         |          | 51788  | 59272       |          | 77716   | 36280    |         |             |          |         |          |         |             |          |         |          |        |
| [K].RGPPTPAPTGLSAPLSFIPRHF.[R]_                              | Q6WN34     |        |             |          |         |          | 80547  | 82961       | 85265    | 230681  | 431358   |         |             |          |         |          |         |             |          |         |          |        |
| [K].RKANDESNHSDVIDSQELS.[K]_                                 | P10451     |        |             |          |         |          | 30799  |             |          | 38756   | 31804    |         |             |          |         |          |         |             |          |         |          |        |
| [K].SADTLWDIQKDLKDL.[-]                                      | P07195     |        |             |          |         |          | 88399  |             |          |         |          |         |             |          |         |          |         |             |          |         |          |        |
| [K].SGVAPQKMGASPTKDSDKDSDFW.[K]_                             | Q13438     |        |             |          |         |          |        |             |          |         | 150160   |         |             |          |         |          |         |             |          |         |          |        |
| [K].SGVAPQKMGASPTKDSDKDSDFWK.[M]_                            | Q13438     |        |             |          |         |          | 43829  | 53530       | 97951    | 82548   | 70249    |         |             |          |         |          |         |             |          |         |          |        |
| [K].SHALQNNRQIR.[G]_                                         | P0C0L4     |        |             |          |         |          |        |             |          |         |          | 330064  | 546423      | 367008   | 490726  | 241121   |         |             |          |         |          |        |
| [K].SKEEDKHLKF.[R]_                                          | P10451     |        |             |          |         |          | 32450  | 31229       |          | 33025   | 8354     |         |             |          |         |          |         |             |          |         |          |        |
| [K].SKKFRRPDIQYPDATD.[E]_                                    | P10451     |        |             |          |         |          | 257576 | 191838      | 223838   | 533586  | 227688   |         |             |          |         |          |         |             |          |         |          |        |
| [K].SLEDKTERELLESYIDGR.[I]_                                  | P00734     |        |             |          |         |          | 73603  | 63687       | 377362   | 128791  | 50027    |         |             |          |         |          |         |             |          |         |          |        |
| [K].SPTIFFDPQIPKLTDLLE.[N]_                                  | P05814     |        |             |          |         |          | 236347 | 156973      |          | 116828  |          | 451507  | 448563      | 433807   | 390458  | 401254   |         |             |          |         |          |        |
| [K].SPTIFFDPQIPKLTDLLENLHLP.LPL.LQPL.[M]_                    | P05814     |        |             |          |         |          | 572133 | 1617824     | 1658554  | 1853940 | 1260851  | 1651991 | 1921243     | 1602503  | 1597470 | 1419110  | 1276299 |             | 36472    | 60822   |          |        |
| [K].SPTIFFDPQIPKLTDLLENLHLP.LPL.LQPLM.[Q]_1xOxidation [M31]  | P05814     |        | 53376       |          |         |          | 157867 | 566616      | 720908   | 359144  | 500973   | 435129  | 447155      | 651660   | 580272  | 399948   | 686043  |             |          | 75085   |          |        |
| [K].SPTIFFDPQIPKLTDLLENLHLP.LPL.LQPLMQ.[Q]_1xOxidation [M31] | P05814     |        |             |          |         |          | 36319  | 277954      | 315134   | 260895  | 156913   | 99205   | 260147      | 441261   | 335756  | 264339   | 409640  |             |          |         |          |        |
| [K].SPTIFFDPQIPKLTDLLENLHLP.LPL.LQPLMQQ.[V]_                 | P05814     |        |             |          |         |          |        | 68631       | 27573    | 41998   | 42793    | 118104  | 64397       | 57725    | 96396   | 184431   |         |             |          |         |          |        |
| [K].SQLQKVPPEWK.[A]_                                         | P02671     |        |             |          |         |          | 23315  | 95431       | 64799    | 148430  | 132567   |         |             |          |         |          |         |             |          |         |          |        |
| [K].SQLQKVPPEWKALDMPQM.[R]_                                  | P02671     |        |             |          |         |          |        | 32044       | 31997    | 58452   | 51588    |         |             |          |         |          |         |             |          |         |          |        |
| [K].SQQTISQLH.[S]_                                           | Q99541     |        |             |          |         |          |        |             |          |         |          | 41883   | 48787       | 26110    | 33333   | 16632    |         |             |          |         |          |        |
| [K].SSIVTSKLAGQVE.[-]                                        | Q43768     |        |             |          |         |          | 30919  | 42085       |          | 43698   |          |         |             |          |         |          |         |             |          |         |          |        |
| [K].SSYSKQFTSTSY.[N]_                                        | P02671     |        |             |          |         |          | 52262  | 47770       | 54911    | 60050   | 33701    |         |             |          |         |          | 32134   | 30243       | 23346    | 33359   | 10028    |        |
| [K].SSYSKQFTSTSYN.[R]_                                       | P02671     |        |             |          |         |          |        |             |          |         |          |         |             |          |         |          | 129868  | 109697      | 199651   | 72552   |          |        |
| [K].SSYSKQFTSTSYNRGDS.[F]_                                   | P02671     |        |             |          |         |          |        |             |          |         |          |         |             |          |         |          |         | 16751       | 18945    |         |          |        |
| [K].SSYSKQFTSTSYNRGDSFESKSYK.[M]_                            | P02671     |        |             |          |         |          |        |             |          |         |          |         |             |          |         |          |         |             |          |         | 19244    |        |
| [K].SVREDSRQKLEK.[T]_                                        | Q13410     |        |             |          |         |          |        |             |          |         |          | 75702   | 121410      | 58565    | 50004   | 40032    |         |             |          |         |          |        |
| [K].TAPVYPMYYVPSYPPYGTNLYQR.[R]_                             | P07498     |        |             |          |         |          | 565530 |             | 190083   | 1653753 | 374858   | 990790  | 553676      | 504911   | 770187  | 927914   | 1004595 |             |          |         |          |        |
| [K].TAPVYPMYYVPSYPPYGTNLYQR.[R]_1xOxidation [M7]             | P07498     |        |             |          |         |          |        |             |          |         |          |         |             |          |         |          | 214709  |             |          |         |          |        |
| [K].TAPVYPMYYVPSYPPYGTNLYQRRPAIA.[I]_                        | P07498     |        |             |          |         |          |        |             |          |         |          | 39823   | 33797       | 27294    | 59669   | 91469    |         |             |          |         |          |        |
| [K].TGDPNMGDSAVPTHWEPTYTENSGLYITK.[K]_1xOxidation [M6]       | P19835     |        |             |          |         |          |        | 180626      | 197068   | 298088  | 250659   | 219387  |             |          |         |          |         |             |          |         |          |        |
| [K].TGDPNMGDSAVPTHWEPTYTENSGLYITKK.[M]_                      | P19835     |        |             |          |         |          | 118707 | 568373      | 491402   | 536420  | 948588   | 745432  | 106945      |          | 101726  | 102115   | 119635  |             |          |         |          |        |
| [K].TGTVALEVDHFSVNGNTQDLSQSIMER.[A]_                         | P47989     |        |             |          |         |          |        | 95429       | 97987    | 67798   | 74634    |         |             |          |         |          |         |             |          |         |          |        |
| [K].TLJEKNEERKTLNLEEA.[K]_                                   | P10909     |        |             |          |         |          |        |             |          |         |          |         |             | 37599    |         | 40977    | 46336   |             |          |         |          |        |
| [K].TPALIVYGDQDPMGQTSFEHLK.[Q]_                              | Q96IU4     |        |             |          |         |          |        |             |          |         |          |         |             | 23016    | 31359   | 14050    | 34966   |             |          |         |          |        |
| [K].TTFDVTESWAQDPSQENKKK.[T]_                                | P19835     |        |             |          |         |          |        | 65831       | 37731    | 184215  | 151526   |         |             |          |         |          |         |             |          |         |          |        |
| [K].TVVDFETDVLFLVPTETALAQHR.[R]_                             | P19835     |        |             |          |         |          |        | 66165       | 35975    | 179453  | 64176    | 317115  |             |          |         |          |         |             |          |         |          |        |
| [K].TVVDFETDVLFLVPTETALAQHR.[A]_                             | P19835     |        |             |          |         |          | 223642 |             |          | 424435  | 1597166  |         |             |          |         | 57673    | 70048   |             |          |         |          |        |
| [K].TVVDFETDVLFLVPTETALAQHRANA.[K]_                          | P19835     |        |             |          |         |          |        |             |          |         |          |         |             |          |         |          | 162668  |             |          |         |          |        |
| [K].VAALGSDPHISM.[Q]_                                        | Q13410     |        |             |          |         |          |        |             |          |         |          | 30390   | 35680       | 23051    | 12267   |          | 14576   | 61453       | 27454    |         |          |        |
| [K].VAALGSDPHISMQVQE.[N]_                                    | Q13410     |        |             |          |         |          |        |             | 13850    |         | 56319    |         |             |          |         |          |         |             |          |         |          |        |
| [K].VEGFDLVQKPSYYVRLG.[S]_                                   | Q99541     |        |             |          |         |          |        |             |          |         |          | 27392   | 41839       | 43703    | 42275   | 26450    |         |             |          |         |          |        |
| [K].VEISIPASSLPRLTPWIVAV.[A]_                                | Q13410     |        |             |          |         |          |        |             |          |         |          |         |             |          |         |          | 89698   | 77981       | 98120    | 326783  | 44619    |        |
| [K].VEISIPASSLPRLTPWIVAVA.[V]_                               | Q13410     |        |             |          |         |          |        |             |          |         |          |         |             |          |         |          | 683043  | 659970      | 691771   | 530639  | 307384   |        |
| [K].VEKVKHEDQQQGEDEHQDK.[I]_                                 | P05814     |        |             |          |         |          | 25409  | 39191       | 42944    | 120194  | 95254    | 17734   |             |          |         |          |         |             |          |         |          |        |
| [K].VEKVKHEDQQQGEDEHQDKIYP.[S]_                              | P05814     |        |             |          |         |          | 19633  | 47006       | 45137    | 105786  | 65544    | 35819   |             |          |         |          |         |             |          |         |          |        |
| [K].VEKVKHEDQQQGEDEHQDKIYPSFQPPQ.[L]_                        | P05814     |        |             |          |         |          |        |             |          | 92968   | 52783    | 16283   |             |          |         |          |         |             |          |         |          |        |
| [K].VEQAVETEPEPELR.[Q]_                                      | P02649     |        |             |          |         |          |        |             | 45720    | 83204   | 102973   |         |             |          |         |          |         |             |          |         |          |        |
| [K].VETKYEQLKTPGKK.[K]_                                      | P12272     |        |             |          |         |          |        |             |          |         |          | 30371   | 54520       | 33962    | 46398   | 37321    |         |             |          |         |          |        |
| [K].VKHEDQQQGEDEHQDK.[K]_                                    | P05814     |        |             |          |         |          |        |             |          | 36613   | 7644     |         |             |          |         |          |         |             |          |         |          |        |
| [K].VKHEDQQQGEDEHQDKIYPS.[F]_                                | P05814     |        |             |          |         |          | 26281  | 213765      | 246205   | 321120  | 205074   | 107852  | 471491      | 559122   | 473215  | 519514   | 485617  |             | 46532    | 25763   | 32403    |        |
| [K].VKHEDQQQGEDEHQDKIYPSF.[Q]_                               | P05814     |        |             |          |         |          |        | 78233       | 36372    | 94727   | 72532    | 87824   | 72286       | 88607    | 55132   | 74008    | 77545   |             |          |         |          |        |
| [K].VKHEDQQQGEDEHQDKIYPSFQPPQ.[P]_                           | P05814     |        |             |          |         |          |        |             | 48362    |         | 51809    | 72819   |             |          |         |          |         |             |          |         |          |        |
| [K].VKHEDQQQGEDEHQDKIYPSFQPPQLI.[Y]_                         | P05814     |        |             |          |         |          |        |             |          |         |          | 66649   | 76166       | 65889    | 58880   | 53700    |         |             |          |         |          |        |
| [K].VLDSGFRIENK.[A]_                                         | P01833     |        |             |          |         |          |        |             |          |         |          | 69875   | 279481      | 47888    | 50684   | 18156    | 82812   | 152119      | 148486   | 36471   | 63773    |        |
| [K].VLPPIQVVPYPQRA.[V]_                                      | P05814     |        |             |          |         |          |        | 129528      | 96238    | 96194   | 192056   | 141263  | 140304      | 164170   | 171619  | 322758   | 475311  | 50030       | 21201    | 37913   | 73751    | 164360 |
| [K].VLPPIQVVPYPQRAVP.[V]_                                    | P05814     |        |             |          |         |          |        |             |          |         |          |         |             |          |         |          | 35457   | 37202       | 30441    | 62882   | 199931   |        |
| [K].VLPPIQVVPYPQRAVPVQALLLNQEL.[L]_                          | P05814     |        |             |          |         |          |        |             |          | 70469   | 83707    | 146031  |             |          | 122035  |          | 264015  |             |          |         |          |        |

| Quantified modified peptide sequence       | Protein ID | A_-80oC | A_-20oC_120h | A_4oC_6h | A_RT_6h | A_RT_24h | B_-80oC  | B_-20oC_120h | B_4oC_6h | B_RT_6h | B_RT_24h | C_-80oC  | C_-20oC_120h | C_4oC_6h | C_RT_6h  | C_RT_24h | D_-80oC | D_-20oC_120h | D_4oC_6h | D_RT_6h | D_RT_24h |        |
|--------------------------------------------|------------|---------|--------------|----------|---------|----------|----------|--------------|----------|---------|----------|----------|--------------|----------|----------|----------|---------|--------------|----------|---------|----------|--------|
| [K].VLPIPQQVVPYPQRAVPVQALLNQELL.[L]_       | P05814     |         |              |          |         |          |          |              |          |         |          |          | 131739       | 96525    |          | 261401   |         |              |          |         |          |        |
| [K].VLPIPQQVVPYPQRAVPVQALLNQELL.[N]_       | P05814     |         |              |          |         |          |          | 54860        | 36916    |         | 95933    | 125702   | 163060       | 127637   | 107341   | 190036   |         |              |          |         |          |        |
| [K].VLPIPQQVVPYPQRAVPVQALLNQELLNP.T.[H]_   | P05814     |         |              |          |         |          | 59139    | 49096        | 178487   | 47671   | 40637    | 218530   | 230849       | 206946   | 176003   | 434063   |         |              |          |         |          |        |
| [K].VLPIPQQVVPYPQRAVPVQALLNQELLNP.TH.[Q]_  | P05814     |         | 39646        |          |         | 214724   |          | 166516       | 202110   | 359050  |          | 445852   |              | 414953   |          | 1393677  |         |              |          |         |          |        |
| [K].VLPIPQQVVPYPQRAVPVQALLNQELLNP.THQ.[I]_ | P05814     |         |              |          |         |          |          |              |          |         |          | 63743    | 51051        | 68299    |          | 59168    |         |              |          |         |          |        |
| [K].VPEWVDTKL.[A]_                         | P39019     |         |              |          |         |          |          |              |          |         |          | 16253    | 26003        | 10911    | 24135    | 10231    |         |              |          |         |          |        |
| [K].VPPWEWK.[A]_                           | P02671     |         |              |          |         |          | 90682    | 84774        | 69770    | 126899  | 56454    |          |              |          |          |          |         |              |          |         |          |        |
| [K].VQAAVGTSAAAPVPSDNH.[-]_                | P02649     |         |              |          |         |          |          |              | 91660    | 47161   |          |          |              |          |          |          |         |              |          |         |          |        |
| [K].VSFLSALEEYTKKLNQ.[-]_                  | P02647     |         |              |          |         |          |          | 76703        | 184634   | 197820  | 178832   |          |              |          |          |          |         |              |          |         |          |        |
| [K].VSPAVLVHRDG.[R]_                       | Q13410     |         |              |          |         |          |          |              |          |         |          |          |              |          |          |          |         | 18089        | 46094    | 19578   |          |        |
| [K].VSPAVLVHRDGRQEAEQMPEYR.[G]_            | Q13410     |         |              |          |         |          |          |              |          |         |          |          |              |          |          |          |         |              |          |         |          |        |
| [K].VTEEDFYK.[L]_                          | P19835     |         |              |          |         |          |          |              |          | 63376   | 36964    |          |              |          |          |          |         |              |          |         |          |        |
| [K].VTEEDFYKLVSEFTITKGL.[R]_               | P19835     |         |              |          |         |          |          |              |          | 50285   | 18536    |          |              |          |          |          |         |              |          |         |          |        |
| [K].VTEEDFYKLVSEFTITKGLRGA.[K]_            | P19835     |         |              |          |         |          | 22764    | 30376        |          | 41267   | 115072   |          |              |          |          |          |         |              |          |         |          |        |
| [K].VVSQKDTLGNQTIKQK.[S]_                  | Q14512     |         |              |          |         |          |          |              |          |         | 610302   |          |              |          |          |          |         |              |          |         |          |        |
| [K].YPDAAVATWLNPPDSQKQLLAPQ.[N]_           | P10451     |         |              |          |         |          |          |              |          |         |          | 55280    | 75413        | 63087    | 77559    | 37216    | 18140   | 21027        |          |         | 18120    |        |
| [K].YPIEHGIITNWD.[D]_                      | P68133     |         |              |          |         |          |          |              |          |         |          | 156930   | 137894       | 190310   | 161169   | 85559    |         |              |          |         |          |        |
| [KA].LPIIKK.[RL]_                          | Q99541     |         |              |          |         |          |          |              |          |         |          | 16017    | 24630        |          | 18249    | 35842    |         |              |          |         |          |        |
| [KA].LPLIQK.[RL]_                          | Q99541     |         |              |          |         |          |          |              |          |         |          | 537051   | 693748       | 856088   | 637336   | 228664   |         |              |          |         |          |        |
| [L].ADTKELVSSKVSQAQ.[E]_                   | O60664     |         |              |          |         |          | 65693    | 73939        | 51553    | 31188   | 12711    |          |              |          |          |          |         |              |          |         |          |        |
| [L].ADTKELVSSKVSQAQEMVS.[S]_               | O60664     |         |              |          |         |          |          |              |          |         |          | 29629    | 25407        |          | 48758    |          |         |              |          |         |          |        |
| [L].AIESQDAGIKTITMLD.[E]_                  | O00161     |         |              |          |         |          |          |              |          |         |          | 104481   | 106742       | 145990   | 143994   | 122549   |         |              |          |         |          |        |
| [L].ALPPQPLWVSPQK.[K]_                     | P05814     |         |              |          |         |          |          |              |          |         |          | 21699    | 23995        | 23290    | 21202    |          |         |              |          |         |          |        |
| [L].ALPPQPLWVSPQPKV.[L]_                   | P05814     |         |              |          |         |          |          |              |          |         |          | 149349   | 123508       | 97541    | 222590   | 318682   |         |              |          |         |          |        |
| [L].ALPPQPLWVSPQPKV.[P]_                   | P05814     |         |              |          |         |          |          |              |          |         |          |          |              |          |          |          |         | 18391        |          |         | 185791   |        |
| [L].ALPPQPLWVSPQPKVLPPIQQQ.[V]_            | P05814     |         |              |          |         |          | 208433   | 125753       | 576945   | 69385   | 50661    |          |              |          |          |          |         |              |          |         |          |        |
| [L].ALPPQPLWVSPQPKVLPPIQQV.[V]_            | P05814     |         |              |          |         |          |          |              |          |         |          |          |              |          |          |          |         |              |          |         |          |        |
| [L].ALPPQPLWVSPQPKVLPPIQQVVPYP.[Q]_        | P05814     |         |              |          |         |          |          |              |          |         |          | 35497    | 39605        | 52160    | 122365   | 348422   |         | 10334        | 17444    |         | 44739    |        |
| [L].ALPPQPLWVSPQPKVLPPIQQVVPYPQRA.[A]_     | P05814     |         |              |          |         |          | 56563    | 36616        | 122623   | 259984  | 27468    |          |              |          |          |          |         |              |          |         |          |        |
| [L].ALPPQPLWVSPQPKVLPPIQQVVPYPQRA.[V]_     | P05814     |         |              |          |         |          | 2076057  | 2211052      | 1956214  | 2090041 | 4743781  |          |              |          |          |          |         |              |          |         |          |        |
| [L].ALPPQPLWVSPQPKVLPPIQQVVPYPQRAV.[P]_    | P05814     |         |              |          |         |          |          |              |          |         |          | 125767   | 174988       | 141490   | 145070   | 288676   | 353050  | 333147       | 325725   | 295425  | 286917   |        |
| [L].ALPPQPLWVSPQPKVLPPIQQVVPYPQRAVQ.[A]_   | P05814     |         |              |          |         |          | 114395   | 78871        | 130701   | 105315  |          |          |              |          |          |          |         |              |          |         | 113035   |        |
| [L].APQNAVSEETNDFK.[Q]_                    | P10451     |         |              |          |         |          |          |              |          |         |          |          |              |          |          |          |         | 72598        | 97255    | 54653   | 70308    | 833129 |
| [L].APVHNPI.[S]_                           | P05814     |         |              |          |         |          |          |              |          |         |          | 78239    | 88933        | 67859    | 85160    | 76152    |         |              |          |         |          |        |
| [L].APVHNPISV.[-]_                         | P05814     |         |              |          |         |          | 131158   | 165974       | 101656   | 31123   | 27849    |          |              |          |          |          |         |              |          |         |          |        |
| [L].AQPAVLPVPQPEIMEVPK.[A]_                | P05814     |         |              |          |         |          | 12241895 | 12025568     | 9081944  | 9424618 | 8871386  | 11283883 | 12390129     | 12874609 | 12046359 | 18659908 | 5766202 | 5506024      | 5554716  | 7071399 | 5825784  |        |
| [L].AQPAVLPVPQPEIMEVPKA.[K]_               | P05814     |         | 25866        |          | 467592  | 1087148  | 51229    | 68801        | 977548   | 1585968 | 2911984  | 1913499  | 2226493      | 2378942  | 2590039  | 1326032  |         | 151183       |          | 309013  | 118785   |        |
| [L].AQPAVLPVPQPEIMEVPKAK.[D]_              | P05814     |         |              |          |         | 172926   | 434514   | 442860       | 324141   | 483238  |          | 145404   | 96056        | 92611    | 147740   | 175914   |         |              |          |         |          |        |
| [L].AQPAVLPVPQPEIMEVPKAKDTVYTK.[G]_        | P05814     |         |              |          |         |          | 76848    | 70794        | 81520    | 81544   | 78013    | 86051    | 83714        | 66167    | 82454    | 72765    |         |              |          |         |          |        |
| [L].AQPAVLPVPQPEIMEVPKAKDTVYTKG.[R]_       | P05814     |         |              |          |         |          | 214376   | 193947       | 596824   | 136665  | 67309    | 353811   | 372023       | 307371   | 308201   | 228344   | 22227   | 38332        | 20481    | 23948   | 40478    |        |
| [L].DAPPPPAAPLPRWVSGPVGWSG.[L]_            | Q99523     |         |              |          |         |          | 88894    | 95078        | 191212   | 51623   |          |          |              |          |          |          |         |              |          |         |          |        |
| [L].DDQKWKQEEEMELYR.[Q]_                   | P02647     |         |              |          |         |          |          |              |          |         |          | 29934    | 30637        |          |          |          |         |              |          |         |          |        |
| [L].DDQSAETHSHK.[Q]_                       | P10451     |         |              |          |         |          |          |              |          |         |          | 148638   | 128493       | 67808    | 103483   | 108267   |         |              |          |         |          |        |
| [L].DDQSAETHSHKQS.[R]_                     | P10451     |         |              |          |         |          |          |              |          |         |          | 569881   | 585790       | 427800   | 412512   | 298253   |         |              |          |         |          |        |
| [L].DDYVNTQGSLSFVSTKK.[Q]_                 | P00747     |         |              |          |         |          |          |              |          |         |          | 28048    | 34671        | 28831    | 20838    | 20680    |         |              |          |         |          |        |
| [L].DESLQVAERLT.[T]_                       | P10909     |         |              |          |         |          | 23166    | 34370        |          | 23185   | 46937    |          |              |          |          |          |         |              |          |         |          |        |
| [L].DESLQVAERLT.[R]_                       | P10909     |         |              |          |         |          | 96885    | 107962       | 66705    | 101882  | 178532   | 77402    | 78926        | 84015    | 63050    | 54032    |         |              |          |         |          |        |
| [L].DESLQVAERLT.[R]KYNEL.[L]_              | P10909     |         | 54554        | 49533    | 121657  | 22468    | 50537    | 39905        |          | 28203   | 26163    | 72203    | 68726        | 63578    | 67169    | 49685    |         |              |          |         |          |        |
| [L].DESLQVAERLT.[R]KYNEL.[K]_              | P10909     |         |              |          |         |          |          | 372804       | 2591603  | 304507  | 138584   |          |              |          |          |          |         |              |          |         |          |        |
| [L].DEVKEQVAEV.[R]_                        | P02649     |         |              |          |         |          | 57388    | 108638       |          | 111174  | 37957    |          |              |          |          |          |         |              |          |         |          |        |
| [L].DEVKEQVAEV.[A]_                        | P02649     |         |              |          |         |          | 74231    | 93337        |          | 38585   | 18863    |          |              |          |          |          |         |              |          |         |          |        |
| [L].DGAQIPRODPSQQLPR.[L]_                  | P49327     |         |              |          |         |          | 145054   | 189399       | 67598    | 41377   | 36469    |          |              |          |          |          |         |              |          |         |          |        |
| [L].DGGFIYEGLAPYK.[L]_                     | P02788     |         |              |          |         |          |          | 25357        | 34109    | 36362   | 98565    |          |              |          |          |          |         |              |          |         |          |        |
| [L].DIKIDYW.[L]_                           | P00709     |         |              |          |         |          | 28114    | 43834        |          | 60005   | 40644    |          |              |          |          |          |         |              |          |         |          |        |
| [L].DIKIDYWLAKH.[A]_                       | P00709     |         |              |          |         |          |          |              |          | 69435   |          |          |              |          |          |          |         |              |          |         |          |        |
| [L].DKIDVIKQ.[A]_                          | Q5JWF2     |         |              |          |         |          |          |              |          |         |          |          |              |          |          |          |         | 21351        | 28864    | 26550   |          | 11954  |
| [L].DKLEENLPI.[Q]_                         | O60664     |         |              |          |         |          |          |              |          |         |          | 34652    | 39572        | 59650    | 31349    |          |         |              |          |         |          |        |
| [L].DKLTVTSQNLQLENLR.[M]_                  | Q04233     |         | 56051        |          |         | 26215    |          |              |          |         |          | 61469    | 73966        | 89508    | 59420    | 35704    |         |              |          |         |          |        |
| [L].DPDTAHPHL.[F]_                         | Q13410     |         |              |          |         |          |          |              |          |         |          | 483452   | 567441       | 311122   | 399090   | 187151   |         |              |          |         |          |        |
| [L].DPDTAHPHFLY.[E]_                       | Q13410     |         |              |          |         |          |          |              |          |         |          | 1602468  | 1706924      | 1954743  | 1349324  | 923175   |         |              |          |         |          |        |
| [L].DRIEERLPIL.[N]_                        | Q99541     |         |              |          |         |          | 176428   | 210275       | 119484   | 130005  | 76278    | 947942   | 976786       | 1185195  | 957606   | 601857   |         |              |          |         |          |        |
| [L].DRLAYIAHPKLG.[K]_                      | P47914     |         |              |          |         |          |          |              |          |         | 32964    |          |              |          |          |          |         |              |          |         |          |        |
| [L].DSGFREIE.[N]_                          | P01833     |         |              |          |         |          | 26717    | 41314        |          | 103837  | 72836    |          |              |          |          |          |         |              |          |         |          |        |
| [L].DSGFREIENK.[A]_                        | P01833     |         |              |          |         |          | 526811   | 641584       | 810177   | 863449  | 507239   | 102879   | 349185       | 120474   | 119433   | 42239    |         |              |          |         |          |        |
| [L].DSGFREIENKAIQDPR.[L]_                  | P01833     |         |              |          |         |          | 265750   | 262876       | 244270   | 612872  | 1204972  |          |              |          |          |          |         |              |          |         |          |        |
| [L].DSGVTGSGLEGDHL.[L]_                    | P12272     |         |              |          |         |          |          |              |          |         |          |          |              |          |          |          |         | 29125        | 28308    | 28314   |          |        |
| [L].DSGVTGSGLEGDHL.[D]_                    | P12272     |         |              |          |         |          |          |              |          |         |          |          |              |          |          |          |         | 30598        | 31538    | 35992   | 38738    | 18161  |
| [L].DTAVENMPSLK.[M]_                       | P49327     |         |              |          |         |          |          | 25140        |          | 36065   | 44363    |          |              |          |          |          |         |              |          |         |          |        |
| [L].DTSPEETDOEVFLGPPEAQSFSSHTRIPIR.[A]_    | Q14669     |         |              |          |         |          | 64284    | 54049        |          |         |          |          |              |          |          |          |         |              |          |         |          |        |
| [L].EDKNSPFYDWHLS.[L]_                     | Q14802     |         |              |          |         |          |          |              |          |         |          |          |              |          |          |          |         |              |          |         |          |        |
| [L].EDKTERELLESYIDGR.[I]_                  | P00734     |         |              |          |         |          | 84231    | 86004        | 169625   | 454180  | 252962   |          |              |          |          |          |         | 32500        | 24292    | 23180   |          | 18154  |
| [L].EEELQFSLGSKIN.[V]_                     | P0C0L4     |         |              |          |         |          |          |              |          |         |          | 102573   | 90201        | 135314   | 326577   | 415321   |         |              |          |         |          |        |
| [L].EEELQFSLGSKINVK.[V]_                   | P0C0L4     |         |              |          |         |          |          |              |          | 24833   | 51063    | 184263   | 138485       | 226547   | 258580   | 191917   |         |              |          |         |          |        |

| Quantified modified peptide sequence       | Protein ID | A_-80oC | A_-20oC_120h | A_4oC_6h | A_RT_6h | A_RT_24h | B_-80oC | B_-20oC_120h | B_4oC_6h | B_RT_6h | B_RT_24h | C_-80oC | C_-20oC_120h | C_4oC_6h | C_RT_6h | C_RT_24h | D_-80oC | D_-20oC_120h | D_4oC_6h | D_RT_6h | D_RT_24h |
|--------------------------------------------|------------|---------|--------------|----------|---------|----------|---------|--------------|----------|---------|----------|---------|--------------|----------|---------|----------|---------|--------------|----------|---------|----------|
| [I].EEEEQLQSLGSKINVKVGGNSK.[G]_            | P0C0L4     |         |              |          |         |          |         |              |          |         |          | 25530   |              | 20678    | 41416   | 48389    |         |              |          |         |          |
| [I].EEEEQLQSLGSKINVKVGGNSKGLT.[K]_         | P0C0L4     |         |              |          |         |          |         |              |          |         |          | 134540  | 127975       | 107990   | 103634  | 246775   |         |              |          |         |          |
| [I].EEQAQQLRLQAEAFQARLK.[S]_               | P02649     |         |              |          |         |          | 56806   |              | 67152    |         |          |         |              |          |         |          |         |              |          |         |          |
| [I].EYYTKLNTQ.[I]_                         | P02647     |         |              |          |         |          | 25239   | 30914        |          | 59436   | 26900    |         |              |          |         |          |         |              |          |         |          |
| [I].EIPGNSDPNMIPDGFNSYVR.[V]_              | P0C0L4     |         |              |          |         |          |         |              |          |         |          |         |              |          |         |          |         |              |          |         |          |
| [I].ENLHLPLPLL.[Q]_                        | P05814     |         |              |          |         |          | 386473  |              |          |         |          | 56454   | 40401        | 57337    | 43869   | 28369    |         |              |          |         |          |
| [I].ENLHLPLPLLQ.[P]_                       | P05814     |         |              |          |         |          | 292835  | 235360       |          | 222663  | 298539   | 32730   |              |          | 166516  | 262898   |         |              |          |         | 56627    |
| [I].ENLHLPLPLLQPLM.[Q]_                    | P05804     |         |              |          |         | 27746    | 246007  | 170588       |          | 145476  | 166635   | 55212   | 63216        | 96821    | 264353  | 569671   |         |              |          |         | 110932   |
| [I].ENLHLPLPLLQPLMQ.[Q]_                   | P05814     |         |              |          |         |          | 93325   |              |          | 80953   | 7402192  |         |              |          | 394773  | 516060   |         |              |          |         | 244810   |
| [I].ENLHLPLPLLQPLMQQ.[V]_                  | P05814     |         |              |          |         |          |         |              |          |         |          | 16154   | 32696        | 19173    | 277834  | 973142   |         |              |          |         | 232861   |
| [I].ENLHLPLPLLQPLMQQV.[P]_                 | P05814     |         |              |          |         |          |         |              |          |         |          | 23331   | 35322        |          | 17767   | 47085    |         |              |          |         |          |
| [I].ENLHLPLPLLQPLMQQVPQIPQTLA.[I]_         | P05814     |         |              |          |         |          | 75468   |              |          |         |          | 23414   |              | 25867    | 40129   | 37680    |         |              |          |         |          |
| [I].ENLHLPLPLLQPLMQQVPQIPQTLA.[P]_         | P05814     |         |              |          |         |          |         |              |          |         |          | 143466  | 120182       | 153083   | 119773  | 23697    |         |              |          |         |          |
| [I].ENLHLPLPLLQPLMQQVPQIPQTLALPPQPLW.[S]_  | P05814     |         |              |          |         |          |         |              |          |         |          | 174009  | 58218        | 184957   | 135462  | 104890   |         |              |          |         |          |
| [I].ENPQPHPGWQG.[T]_                       | P19835     |         |              |          |         |          | 161591  | 173414       | 46245    | 161650  | 150087   |         |              |          |         |          |         |              |          |         |          |
| [I].ENPQPHPGWQGTUKAKNF.[K]_                | P19835     |         |              |          |         | 50795    | 93113   | 86530        | 91325    | 144974  | 162912   |         |              |          |         |          | 30527   |              |          |         |          |
| [I].EPAALGALPLLR.[S]_                      | Q2I0M4     |         |              |          |         |          |         |              |          |         |          | 65598   | 75003        | 66761    | 15989   |          |         | 37950        | 30086    |         |          |
| [I].EPSANMPWFK.[G]_                        | P68104     |         |              |          |         |          |         |              |          |         |          | 72507   | 78973        | 68248    | 46810   | 36136    |         |              |          |         |          |
| [I].ERGEKLDLVSKSEVLG.[T]_                  | O15498     |         |              |          |         |          |         |              |          |         |          | 28718   | 25034        | 36364    | 21518   | 18142    |         |              |          |         |          |
| [I].ESREEYMGMMN.[R]_                       | P47710     |         |              |          |         | 24614    | 88977   | 114305       |          | 84834   | 68678    | 58387   | 77914        | 47300    | 49799   | 35659    |         |              |          |         |          |
| [I].ESREEYMGMMNR.[Q]_                      | P47710     |         |              |          |         |          | 154540  | 445240       | 979253   | 1171844 | 351148   | 28149   | 101408       | 27368    | 73973   | 67862    |         |              |          |         |          |
| [I].ESREEYMGMMNRQRNIL.[R]_                 | P47710     |         |              |          |         | 47325    | 66449   | 71924        |          | 119453  | 55881    |         |              |          |         |          |         |              |          |         |          |
| [I].FAEEKAVADTRD.[Q]_                      | P01833     |         |              |          |         |          | 22674   | 26123        |          |         |          | 28705   | 25340        |          | 33231   |          |         |              |          |         |          |
| [I].FAEEKAVADTRDQADGSRASVDGSSSEEQGSSR.[A]_ | P01833     |         |              |          |         |          | 35443   | 53149        | 179676   |         |          |         |              |          |         |          |         |              |          |         |          |
| [I].FDSDPITVTPVVEVSRKNP.[K]_               | P10909     |         |              |          |         |          |         |              |          |         |          | 47052   | 48931        | 55931    | 73174   | 36011    |         |              |          |         |          |
| [I].FLVPTEIALAQHRANA.[K]_                  | P19835     |         |              |          |         | 18588    | 37836   | 30032        |          | 40389   | 96499    |         |              |          |         |          |         |              |          |         |          |



| Quantified modified peptide sequence                | Protein ID | A_-80oC | A_-20oC_120h | A_4oC_6h | A_RT_6h | A_RT_24h | B_-80oC | B_-20oC_120h | B_4oC_6h | B_RT_6h | B_RT_24h | C_-80oC | C_-20oC_120h | C_4oC_6h | C_RT_6h | C_RT_24h | D_-80oC | D_-20oC_120h | D_4oC_6h | D_RT_6h | D_RT_24h |
|-----------------------------------------------------|------------|---------|--------------|----------|---------|----------|---------|--------------|----------|---------|----------|---------|--------------|----------|---------|----------|---------|--------------|----------|---------|----------|
| [L].RPVAAEVYGTGERQPR.[T]_                           | P02788     |         | 29243        |          |         | 50832    | 131030  | 139090       | 243160   | 327942  | 308707   |         |              |          |         |          |         |              |          |         |          |
| [L].RYPERLQNP.[S]_                                  | P47710     |         |              |          |         |          | 17996   | 22398        |          | 47783   | 37083    |         |              |          |         |          |         |              |          |         |          |
| [L].RYPERLQNP.[S]_                                  | P47710     |         |              |          |         |          | 127670  | 160305       | 59251    | 156744  | 73805    |         |              |          |         |          |         |              |          |         |          |
| [L].RYPERLQNPSE.[S]_                                | P47710     |         |              |          |         |          | 410987  | 366240       | 86632    | 518853  | 470685   | 80628   | 53628        | 48688    | 100130  | 120429   |         |              |          |         |          |
| [L].RYPERLQNPSESSEPIPLESREEYMNGMN.[R]_              | P47710     |         |              |          |         |          | 554248  | 490812       | 457296   | 538551  | 782865   |         |              |          |         |          |         |              |          |         |          |
| [L].SDPGPHPEPGEGEPFFPKGQ.[-]_                       | P19634     |         |              |          |         |          |         |              |          |         |          | 37868   | 49901        | 32298    | 32033   |          |         |              |          |         |          |
| [L].SEAVDTRGAVQSGVDKTSVVTGGVQ.[S]_                  | O60664     |         |              |          |         |          |         |              |          |         |          | 141837  | 147181       | 146412   | 86886   | 59029    |         |              |          |         |          |
| [L].SNIQGVQPNIQDQAKHMGVMA.[G]_                      | Q99541     |         |              |          |         |          |         |              |          |         |          | 126617  | 123744       | 146888   | 109787  | 48757    |         |              |          |         |          |
| [L].SQDRLDAPPPAAPLPRWSGPIGVS.[W]_                   | Q99523     |         |              |          |         |          |         |              |          |         |          |         |              |          |         |          | 18736   | 27220        | 30159    |         |          |
| [L].SSSEESITEYKQ.[K]_                               | P05814     |         |              |          |         |          | 198664  | 247192       | 164715   | 139027  | 84316    | 267797  | 236219       | 235403   | 208080  | 117247   |         |              |          |         |          |
| [L].SSSEESITEYKQKV.[E]_                             | P05814     |         |              |          |         |          | 24899   | 100532       |          | 86915   |          | 432678  | 413500       | 508748   | 836641  | 661939   |         | 28524        |          | 130883  |          |
| [L].SSSEESITEYKQKVEKV.[K]_                          | P05814     |         |              |          |         |          |         |              |          |         |          |         |              |          |         |          |         |              |          | 56158   |          |
| [L].SSSEESITEYKQKVEKV.[H]_                          | P05814     |         |              |          |         |          |         |              |          |         |          |         |              |          |         |          |         |              |          |         |          |
| [L].STKLHSRAYQ.[Q]_                                 | Q99541     |         |              |          |         |          |         |              |          |         |          | 73304   | 83198        | 75173    | 39450   |          |         |              |          |         |          |
| [L].STKLHSRAYQQALS.[R]_                             | Q99541     |         |              |          |         |          |         |              |          |         |          | 63743   | 83178        | 32121    | 41039   | 20306    |         |              |          |         |          |
| [L].STPAPEARPVIGALGL.[-]_                           | Q96AD5     |         |              |          |         |          |         |              |          |         |          | 168429  | 221168       | 189311   | 166348  | 90051    |         |              |          |         |          |
| [L].TDLENLH.[L]_                                    | P05814     |         |              |          |         |          |         |              |          |         |          | 38320   | 57228        |          | 40753   | 21035    |         |              |          |         |          |
| [L].TDLENLHL.[P]_                                   | P05814     |         |              |          |         |          | 56155   | 54193        |          | 66164   | 46112    | 21017   | 26586        | 39688    | 38855   | 32875    |         |              |          |         |          |
| [L].TDLENLHLPL.[L]_                                 | P05814     |         |              |          |         |          |         |              |          |         |          | 47257   | 48927        | 34983    | 86841   | 78179    |         |              |          |         |          |
| [L].TDLENLHLPLPLQ.[P]_                              | P05814     |         |              |          |         |          | 72322   | 38810        |          | 57848   | 49225    | 55661   | 33553        | 35948    | 58289   | 53219    |         |              |          |         |          |
| [L].TDLENLHLPLPLQPL.[Q]_                            | P05814     |         |              | 45852    |         | 51780    | 94910   | 112194       |          | 104081  | 207646   | 12257   | 18921        | 13301    | 38233   | 19564    |         |              |          |         |          |
| [L].TDLENLHLPLPLQPLM.[Q]_                           | P05814     |         |              | 47159    |         | 33982    | 204837  | 181742       |          | 162684  | 210393   | 87818   | 102251       | 95027    | 80260   | 75561    |         |              |          |         |          |
| [L].TDLENLHLPLPLQPLMQ.[Q]_                          | P05814     |         |              |          |         |          | 148012  | 161719       |          | 84044   | 123243   | 471248  | 418805       | 542535   | 372801  | 389227   |         |              |          | 189581  |          |
| [L].TDLENLHLPLPLQPLMQQ.[V]_                         | P05814     |         |              |          |         |          |         |              |          |         |          | 389006  | 303426       | 393898   | 394206  | 435889   |         |              | 46553    | 82540   |          |
| [L].TDLENLHLPLPLQPLMQQVQPPIQT.[L]_1xOxidation [M17] | P05814     |         |              |          |         |          |         |              |          |         |          | 35762   |              | 43501    | 18605   | 51294    |         |              |          |         |          |
| [L].TDLENLHLPLPLQPLMQQVQPPIQT.[L]_                  | P05814     |         |              |          |         |          | 67773   | 62698        | 722236   | 43188   |          | 28229   | 31373        | 39684    | 26975   | 30750    |         |              |          |         |          |
| [L].TDLENLHLPLPLQPLMQQVQPPIQTALA.[L]_               | P05814     |         |              |          |         |          |         |              |          |         |          | 130273  | 112302       | 102575   | 102964  | 72927    |         |              |          |         |          |
| [L].TDLENLHLPLPLQPLMQQVQPPIQTALAL.[P]_              | P05814     |         |              |          |         |          |         |              |          |         |          | 187527  | 97603        | 212780   | 161381  | 154295   |         |              |          |         |          |
| [L].TPSQGVILR.[D]_                                  | P62277     |         |              |          |         |          |         |              |          |         |          | 35515   | 52511        | 44334    | 31166   | 17739    |         |              |          |         |          |
| [L].TQQTQLQSLR.[R]_                                 | O75888     |         |              |          |         |          |         |              |          |         |          |         |              |          |         |          | 42472   | 103489       | 57825    | 57234   |          |
| [L].VPTETIALAQHRANA.[K]_                            | P19835     |         |              |          |         |          | 29066   | 42424        |          | 25192   | 34625    |         |              |          |         |          |         |              |          |         |          |
| [L].VQDGIAGKGRVA.[L]_                               | Q13410     |         |              |          |         |          |         |              |          |         |          | 62128   | 63247        | 81663    | 71621   | 25587    | 156982  | 230583       | 173476   | 87397   |          |
| [L].VQDGIAGKGRVAL.[R]_                              | Q13410     |         |              |          |         |          |         |              |          |         |          |         |              |          |         |          | 14524   | 23910        | 15346    | 48336   |          |
| [L].VQDGIAGKGRVALRIR.[G]_                           | Q13410     |         |              |          |         |          |         |              |          |         |          |         |              |          |         |          |         | 16746        | 15178    |         |          |
| [L].VSSGVENALTK.[S]_                                | Q99541     |         |              |          |         |          |         |              |          |         |          |         |              |          |         |          |         |              |          | 26821   |          |
| [L].VSSGVENALTKSELL.[V]_                            | Q99541     |         |              |          |         |          |         |              |          |         |          | 38927   | 20337        | 34540    | 25300   |          |         |              |          |         |          |
| [L].VSWVPQPK.[V]_                                   | P05814     |         |              |          |         |          | 42830   | 53001        | 65769    | 119499  | 161372   |         | 41470        | 37827    | 22302   | 14647    |         |              |          |         |          |
| [L].WSVPQPKVLPIPQQVVYPYQRAVP.[V]_                   | P05814     |         |              |          |         |          |         |              |          |         |          |         |              |          |         |          |         |              |          |         |          |
| [L].YEDSKSVRLF.[D]_                                 | Q13410     |         |              |          |         |          |         |              |          |         |          |         |              |          |         |          | 85433   | 91557        | 81285    | 52464   |          |
| [L].YNYKYPDAVATWLNPDPSQK.[Q]_                       | P10451     |         |              |          |         |          |         |              |          |         |          | 144009  | 214106       | 21892    | 152715  | 101491   |         |              |          |         |          |
| [M].AENGVKITTS.[V]_                                 | Q99541     |         |              |          |         |          |         |              |          |         |          | 67045   | 73817        | 94563    |         | 118414   |         |              |          |         |          |
| [M].AENGVKITTSVAMTS.[A]_                            | Q99541     |         |              |          |         |          |         |              |          |         |          | 25499   | 42417        | 28908    | 31066   | 18355    |         |              |          |         |          |
| [M].ALLTQQTQLQSLR.[R]_                              | O75888     |         |              |          |         |          |         |              |          |         |          | 184494  | 211363       | 165231   | 131902  | 68058    | 16962   | 50816        |          |         |          |
| [M].AVVLNGGTIPTAPPSHTGRHL.[W]_                      | Q9NZH0     |         |              |          |         |          |         |              |          |         |          |         |              |          |         |          |         |              |          |         |          |
| [M].DETMKELK.[A]_                                   | P02649     |         |              |          |         |          | 32212   | 26423        |          | 51300   | 13633    |         |              |          |         |          |         |              |          |         |          |
| [M].DPAEEDTNVYTEKHSLSL.[F]_                         | P34741     |         |              |          |         |          | 73252   | 133078       | 95855    | 75837   | 60284    |         |              |          |         |          |         |              |          |         |          |
| [M].DPSKPSNNVAGVVIIVILL.[I]_                        | P22897     |         |              |          |         |          |         |              | 141506   |         |          |         |              |          |         |          |         |              |          |         |          |
| [M].ESEELNGAYK.[A]_                                 | P10451     |         |              |          |         |          |         |              |          |         |          | 120933  | 132233       | 105738   | 91861   | 22298    |         |              |          |         |          |
| [M].ETVAEKALQ.[E]_                                  | P10909     |         |              |          |         |          |         |              |          |         |          |         |              |          |         |          |         |              |          |         |          |
| [M].ETVAEKALQEQY.[R]_                               | P10909     |         |              |          |         |          | 54961   | 62547        |          | 54735   | 64105    |         |              |          |         |          |         |              |          |         |          |
| [M].ETVAEKALQEQYR.[K]_                              | P10909     |         |              |          |         |          | 51412   | 54470        |          | 74473   | 54439    | 44926   | 40465        | 47026    | 20859   |          |         |              |          |         |          |
| [M].EVPKADTVYTKG.[R]_                               | P05814     |         |              |          |         |          | 71299   | 84145        | 96487    | 60178   | 20675    |         |              |          |         |          |         |              |          |         |          |
| [M].GEDSAPRDADTLHSLK.[L]_                           | Q13410     |         |              |          |         |          |         |              |          |         |          | 70029   | 93817        | 68610    | 59022   | 32404    |         |              |          |         |          |
| [M].GEDSAPRDADTLHSLKIP.[T]_                         | Q13410     |         |              |          |         |          |         |              |          |         |          | 35972   | 65465        | 65597    | 36220   | 27470    |         |              |          |         |          |
| [M].GIGLVKGGVSAVAGGVTAAGSAVVN.[K]_                  | Q8WUH6     |         |              |          |         |          |         |              |          |         |          | 31933   | 32742        | 47831    | 34311   | 24590    |         |              |          |         |          |
| [M].GTNRGASQAGMTGYGMPPRQL.[-]_                      | P37802     |         |              |          |         |          |         |              |          |         |          | 198406  | 221425       | 103131   | 146679  | 33398    | 28634   | 35711        | 43074    |         |          |
| [M].KPVDPDLVPGN.[F]_                                | P02671     |         |              |          |         |          | 712843  | 747185       | 323182   | 847823  | 187548   | 80558   | 79599        | 85570    | 235396  | 111416   |         |              |          |         |          |
| [M].KPVQKVLKEDSLK.[K]_                              | P11021     |         |              |          |         |          | 173003  | 122508       |          | 319295  | 125572   |         |              |          |         |          |         |              |          |         |          |
| [M].MQLVSSGVENALTK.[S]_                             | Q99541     |         |              |          |         |          |         |              |          |         |          | 48348   | 56844        | 60583    | 41776   | 27080    |         |              |          |         |          |
| [M].NENSHVQVPFQQL.[L]_                              | P47710     |         |              |          |         |          |         | 28406        |          | 36908   | 47013    |         |              |          |         |          |         |              |          |         |          |
| [M].NENSHVQVPFQQL.[N]_                              | P47710     |         |              |          |         |          | 138914  | 97579        | 46863    | 63156   | 90778    |         |              |          |         |          |         |              |          |         |          |
| [M].NENSHVQVPFQQLNQLA.[A]_                          | P47710     |         |              |          |         |          |         |              |          |         |          | 145669  | 61057        | 89327    | 87644   | 93564    |         |              |          |         |          |
| [M].NENSHVQVPFQQLNQLAAYPYA.[V]_                     | P47710     |         |              |          |         |          |         |              |          |         |          | 220663  | 189488       | 131742   | 71083   |          |         |              |          |         |          |
| [M].PGPTPSGTNVGSSGRSPSKA.[V]_                       | P60468     |         |              |          |         |          | 85228   | 96447        |          | 91232   | 93522    |         |              |          |         |          |         |              |          |         |          |
| [M].PGPTPSGTNVGSSGRSPSKAVA.[A]_                     | P60468     |         |              |          |         |          |         |              |          |         |          | 38225   | 52322        | 52883    | 34865   | 26624    |         |              |          |         |          |
| [M].PGPTPSGTNVGSSGRSPSKAVAA.[R]_                    | P60468     |         |              |          |         |          | 105720  | 145844       | 217914   | 91457   | 57898    | 371832  | 522406       | 426184   | 453196  | 377431   | 223945  | 234284       | 251813   | 197638  |          |
| [M].PGVTYKDVNQ.[E]_                                 | P39019     |         |              |          |         |          |         |              |          |         |          | 262542  | 271750       | 213804   | 308685  | 204966   | 102225  | 132305       | 142285   | 117896  |          |
| [M].PGVTYKDVNQEFVRA.[L]_                            | P39019     |         |              |          |         |          |         |              |          |         |          | 19697   |              |          | 24771   |          |         |              |          |         |          |
| [M].PVLKSPT.[I]_                                    | P05814     |         |              |          |         |          |         |              |          |         |          | 42258   | 61666        | 52884    | 35245   | 40216    |         |              |          |         |          |
| [M].PVLKSPTIP.[F]_                                  | P05814     |         |              |          |         |          | 167632  | 196075       |          | 157879  | 172313   |         |              |          |         |          |         |              |          |         |          |
| [M].PVLKSPTIPFFDPQIPKL.[T]_                         | P05814     |         |              |          |         |          | 82484   | 85879        | 80556    | 88109   | 158742   | 102288  | 156495       | 144671   | 192492  | 212127   |         |              |          |         |          |
| [M].PVLKSPTIPFFDPQIPKLTD.[L]_                       | P05814     |         |              |          |         |          | 152147  |              |          | 84151   |          | 156280  | 110991       | 125535   | 250838  | 446115   |         |              |          |         |          |
| [M].PVLKSPTIPFFDPQIPKLTDL.[E]_                      | P05814     |         |              |          |         |          | 174323  | 160123       | 132481   | 113415  | 153907   | 137458  | 128739       | 118420   | 225751  | 462954   |         |              |          |         |          |
| [M].PVLKSPTIPFFDPQIPKLTDLEN.[L]_                    | P05814     |         |              |          |         |          |         |              |          |         |          |         |              |          | 47947   | 56235    |         |              |          |         |          |
| [M].QLVSSGVENALTK.[S]_                              | Q99541     |         |              |          |         |          | 93913   |              | 141872   | 64712   |          | 100100  | 78462        | 145361   | 74367   | 24695    |         |              |          |         |          |

[illegible]

| Quantified modified peptide sequence                 | Protein ID | A_80oC | A_-20oC_120h | A_4oC_6h | A_RT_6h | A_RT_24h | B_-80oC  | B_-20oC_120h | B_4oC_6h | B_RT_6h  | B_RT_24h | C_-80oC | C_-20oC_120h | C_4oC_6h | C_RT_6h | C_RT_24h | D_-80oC | D_-20oC_120h | D_4oC_6h | D_RT_6h | D_RT_24h |       |
|------------------------------------------------------|------------|--------|--------------|----------|---------|----------|----------|--------------|----------|----------|----------|---------|--------------|----------|---------|----------|---------|--------------|----------|---------|----------|-------|
| [P].ENPSQASPRVTCKKARSPVRLP.[H]_                      | O15018     |        |              |          |         |          |          |              |          |          |          | 69216   | 54799        | 38469    | 38615   | 63759    |         |              |          |         |          |       |
| [P].ERLQNPSE.[S]_                                    | P47710     |        |              |          |         |          | 50912    | 44241        |          | 30889    |          |         |              |          |         |          |         |              |          |         |          |       |
| [P].ERLQNPSESSEPIPLE.[S]_                            | P47710     |        |              |          |         |          |          |              |          |          |          | 49103   | 45179        |          |         |          |         |              |          |         |          |       |
| [P].ERLQNPSESSEPIPLESREE.[Y]_                        | P47710     |        |              |          |         |          |          |              |          |          |          | 44211   | 33934        | 45914    | 29422   | 14238    |         |              |          |         |          |       |
| [P].ERLQNPSESSEPIPLESREYYMN.[G]_                     | P47710     |        |              |          |         |          |          |              |          |          |          | 64174   | 52731        | 50599    | 47721   | 30709    |         |              |          |         |          |       |
| [P].FAAPT.KALENPQPHPGWQGT.[K]_                       | P19835     |        |              |          |         |          |          |              |          |          |          |         |              |          |         |          |         |              |          |         |          |       |
| [P].FFDPQIPKLT.[T]_                                  | P05814     |        |              |          |         | 40154    | 152138   | 150742       | 135941   | 150873   | 224579   |         |              |          |         |          |         |              |          |         |          |       |
| [P].FFDPQIPKLT.D.[L]_                                | P05814     |        |              |          |         |          | 36220    | 37593        |          |          | 17154    | 30668   |              |          | 58695   | 100151   |         |              |          |         |          |       |
| [P].FFDPQIPKLT.DLENLH.LPLP.[L]_                      | P05814     |        | 27885        | 35085    |         | 67445    | 52325    | 35405        |          | 19763    |          | 42896   | 49020        | 34631    | 46641   | 97295    |         |              |          |         |          |       |
| [P].FFDPQIPKLT.DLENLH.LPLP.LLQPLM.[Q]_               | P05814     |        |              |          |         |          | 102836   | 110750       | 107042   | 163799   | 283073   | 18351   | 18003        | 21786    | 23186   | 53515    |         |              |          |         |          |       |
| [P].FFDPQIPKLT.DLENLH.LPLP.LLQPLMQ.[Q]_              | P05814     |        |              |          |         |          |          |              |          |          |          | 91509   | 58365        | 54378    | 62231   | 61227    |         |              |          |         |          |       |
| [P].FPPFSDISNPTAHENYEKNVNM.LQW.[_]_1xOxidation [M22] | P47710     |        |              |          | 89026   |          |          |              |          |          |          | 15512   | 19225        | 21298    | 14471   | 81446    |         |              |          |         |          |       |
| [P].FVEPIPIYGFLPQNILP.LAQPAVVLPVPQPEIMEVVPKAK.[D]_   | P05814     |        |              |          |         |          |          |              |          |          | 26327    |         |              |          |         | 45436    |         |              |          |         |          |       |
| [P].GLDGAQIPRODPSQQELPR.[L]_                         | P49327     |        |              |          |         |          |          |              |          |          | 70102    | 45905   | 33348        | 35350    | 25740   | 33429    |         |              |          |         |          |       |
| [P].GQEPPEHMAELQRNEQEQLGQWHLS.[K]_                   | O00391     |        |              |          |         |          | 61358    | 35500        | 73086    | 62173    |          | 23726   |              |          |         |          |         |              |          |         |          |       |
| [P].IIQKLEPIA.[V]_                                   | Q99541     |        |              |          |         |          |          |              |          |          |          | 159033  | 211547       | 201771   | 226679  | 89269    |         |              |          |         |          |       |
| [P].IPLESREE.[Y]_                                    | P47710     |        |              |          |         |          | 97563    | 132674       | 100552   | 70648    | 36902    | 35334   | 34872        | 32456    | 24231   | 11643    |         |              |          |         |          |       |
| [P].IPLESREYYM.[N]_                                  | P47710     |        |              |          |         |          |          |              |          |          |          | 72127   | 71872        | 82953    | 60043   | 46596    |         |              |          |         |          |       |
| [P].IPLESREYYMNGM.[N]_                               | P47710     |        |              |          |         |          | 54504    | 44195        |          | 46286    | 72111    |         |              |          |         |          |         |              |          |         |          |       |
| [P].IPLESREYYMNGMN.[R]_1xOxidation [M13]             | P47710     |        |              |          |         |          | 63427    | 74625        | 119909   | 55750    | 30049    |         |              |          |         |          |         |              |          |         |          |       |
| [P].IPLESREYYMNGMNR.[Q]_                             | P47710     |        |              |          |         | 28220    | 637921   | 773248       | 709758   | 835833   | 700758   | 817196  | 775726       | 785888   | 645086  | 443561   |         |              |          |         |          |       |
| [P].IPQQVVPYPQRAV.[P]_                               | P05814     |        |              |          |         |          | 114319   | 95245        |          | 54485    | 87864    |         |              |          |         |          |         |              |          |         |          |       |
| [P].IPQQVVPYPQRAV.PVQALL.[L]_                        | P05814     |        |              |          |         |          |          | 292421       | 154094   | 161160   | 88167    | 955529  | 1143689      | 1121402  | 978195  | 665684   |         |              |          |         |          |       |
| [P].IPQQVVPYPQRAV.PVQALL.[N]_                        | P05814     |        |              |          |         |          |          |              |          |          |          | 78475   | 83758        | 75991    | 57900   | 74222    |         |              |          |         |          |       |
| [P].IPQQVVPYPQRAV.PVQALLN.[Q]_                       | P05814     |        |              |          |         |          |          |              |          |          |          | 60973   | 51771        | 64429    | 79038   | 45380    |         |              |          |         |          |       |
| [P].KLPLRYPER.[R]_                                   | P47710     |        |              |          |         |          | 101299   | 102720       | 60810    | 70404    | 38285    |         |              |          |         |          |         |              |          |         |          |       |
| [P].KLPLRYPERLQ.[N]_                                 | P47710     |        |              |          |         |          | 53429    | 48483        |          | 54992    | 28380    |         |              |          |         |          |         |              |          |         |          |       |
| [P].KLT.DLENLH.LP.[L]_                               | P05814     |        |              |          |         |          | 46271    | 37795        | 49493    | 23207    | 17178    | 109114  | 106934       | 51132    | 52992   | 25893    |         |              |          |         |          |       |
| [P].LAPVHNPISV.[_]_                                  | P05814     |        |              |          |         |          |          |              |          |          |          | 135953  | 141504       | 136082   | 138717  | 225751   | 42914   | 75228        | 51759    | 70161   | 150439   |       |
| [P].LAQPAVVLPVPQPEIMEVVPKAKD.VVYTKG.[R]_             | P05814     |        |              |          |         | 51032    |          |              |          |          |          |         |              |          |         |          |         |              |          |         |          |       |
| [P].LESREYYMNGMN.[R]_1xOxidation [M11]               | P47710     |        |              |          |         |          | 33712    | 36050        | 43747    | 20943    | 18056    |         |              |          |         |          |         |              |          |         |          |       |
| [P].LESREYYMNGMNR.[Q]_                               | P47710     |        |              |          | 173705  | 131440   | 1087410  | 1217126      | 1833179  | 2788938  | 935864   | 319876  | 346477       | 294253   | 453221  | 422764   |         |              | 28076    |         | 25438    |       |
| [P].LESREYYMNGMNR.[Q]_1xOxidation [M]                | P47710     |        |              |          |         |          | 27318    | 32039        | 72385    | 42960    | 5275     |         |              |          |         |          |         |              |          |         |          |       |
| [P].LESREYYMNGMNRQ.[R]_                              | P47710     |        |              |          |         |          | 80640    | 101228       | 95706    | 60471    | 27020    |         |              |          |         |          |         |              |          |         |          |       |
| [P].LIYPFVEPIPIYGFLPQNILP.[L]_                       | P05814     |        |              |          |         |          |          |              |          |          |          |         |              |          |         |          |         | 18119        | 13043    | 35296   | 74301    | 27092 |
| [P].LIYPFVEPIPIYGFLPQNILP.LAQPAVVLPVPQP.[E]_         | P05814     |        |              |          |         |          | 79963    | 29685        | 43138    | 36750    |          |         |              |          |         |          |         |              |          |         |          |       |
| [P].LLQPLMQQVVPQIPQTLALPPQPLWSVPQPK.[V]_             | P05814     |        | 303342       | 696557   | 354564  | 3512516  | 10951149 | 8838878      | 10468382 | 10255132 | 11105828 |         |              | 126403   | 327774  | 463242   |         |              |          |         |          |       |
| [P].LMQQVVPQIPQTLALPPQPLWSVPQPK.[V]_1xOxidation [M2] | P05814     |        |              |          |         |          |          | 46014        | 73896    | 57969    | 100288   |         |              |          |         |          |         |              |          |         |          |       |
| [P].LPVRGNGVIGINS.[F]_                               | P49327     |        |              |          |         |          |          |              |          |          |          | 423794  | 511597       | 418775   | 238387  | 59181    |         |              |          |         |          |       |
| [P].LQVPITPLQ.FEGRRN.[R]_                            | P0C0L4     |        |              |          |         |          |          |              |          |          |          | 170456  | 179632       | 160186   | 141105  | 124677   | 343046  | 392175       | 319871   | 264803  | 89174    |       |
| [P].LRYPERL.[Q]_                                     | P47710     |        |              |          |         |          | 74382    | 55839        |          | 74105    | 73928    |         |              |          |         |          |         |              |          |         |          |       |
| [P].LRYPERLQNP.[E]_                                  | P47710     |        |              |          |         |          |          | 33357        |          | 64771    | 42262    |         |              |          |         |          |         |              |          |         |          |       |
| [P].LRYPERLQNPSE.[S]_                                | P47710     |        |              |          |         |          | 63594    | 41601        |          | 33466    | 31004    |         |              |          |         |          |         |              |          |         |          |       |
| [P].LRYPERLQNPSESSEPIPLESREYYMNGMN.[R]_              | P47710     |        |              |          |         |          | 221717   | 196766       |          | 253714   | 135370   |         |              |          |         |          |         |              |          |         |          |       |
| [P].LWSVPQPKVLPPIPQQ.[V]_                            | P05814     |        |              |          |         |          | 79513    |              | 196266   | 43731    | 66300    |         |              | 55169    |         | 161751   |         |              |          |         |          |       |
| [P].LWSVPQPKVLPPIPQQVVPYPQRAV.PVQ.[A]_               | P05814     |        |              |          |         |          |          |              |          |          |          | 19348   | 32130        |          | 59932   | 341011   |         |              |          |         |          |       |
| [P].LWSVPQPKVLPPIPQQVVPYPQRAV.PVQALLNQE.[L]_         | P05814     |        |              |          |         |          |          |              |          |          |          |         |              |          |         |          |         |              |          |         |          |       |
| [P].MGEDSAPRDADTLHSK.[L]_                            | Q13410     |        |              |          |         |          |          |              |          |          |          | 33191   |              | 37699    | 32149   |          |         |              |          |         |          |       |
| [P].PPYRPDEFKPNH.[Y]_                                | Q16625     |        |              |          |         |          |          |              |          |          |          | 40764   | 39536        | 37379    | 28752   | 24326    |         |              |          |         |          |       |
| [P].PQPLWSVPQPK.[V]_                                 | P05814     |        |              |          |         |          | 27609    |              |          | 38177    | 79176    |         |              |          |         |          |         |              |          |         |          |       |
| [P].PQPLWSVPQPK.[L]_                                 | P05814     |        |              |          |         |          |          |              |          |          |          |         |              | 135102   |         | 23039    |         |              |          |         |          |       |
| [P].PQSPWDRVKDLATVYVDVLK.[D]_                        | P02647     |        |              |          |         |          |          |              |          |          |          |         |              | 26299    |         | 44545    |         |              |          |         |          |       |
| [P].PSPPPPPPP.[P]_                                   | P10323     |        |              |          |         |          |          |              |          |          |          |         |              | 30157    | 50692   | 30230    |         |              |          |         |          |       |
| [P].QIPKLT.DLENLH.[L]_                               | P05814     |        |              |          |         |          |          |              |          |          |          | 34504   | 60301        | 59526    | 49384   | 39356    |         |              |          |         |          |       |
| [P].QIPKLT.DLENLH.LP.[L]_                            | P05814     |        |              |          |         |          |          |              |          |          |          | 72820   | 64842        | 55279    | 49992   | 69514    |         |              |          |         |          |       |
| [P].QIPKLT.DLENLH.LPLP.[L]_                          | P05814     |        |              |          |         |          |          |              |          |          |          | 73817   | 55214        | 59453    | 63802   | 46480    |         |              |          |         |          |       |
| [P].QIPKLT.DLENLH.LPLP.LLQPLMQQVVPQIPQTL.[L]_        | P05814     |        |              |          |         |          |          |              |          |          |          | 38371   | 70163        | 76920    | 53506   |          |         |              |          |         |          |       |
| [P].QNILP.LAQPAVVLPVPQPEIMEVVPKAKD.VVYTKG.[K]_       | P05814     |        |              |          |         |          |          |              |          |          |          | 53966   | 47945        | 55323    | 94779   | 109117   |         |              |          |         |          |       |
| [P].QPIQPQTLALPPQP.[L]_                              | P05814     |        |              | 51403    |         | 209529   | 601193   | 739656       | 347742   | 825382   | 1323801  | 343318  | 346677       | 368251   | 295384  | 164259   |         |              |          |         |          |       |
| [P].QPIQPQTLALPPQPLWSVPQPK.[K]_                      | P05814     |        |              |          |         |          |          |              |          |          |          | 170565  | 154399       | 180878   | 161231  | 135682   |         |              |          |         |          |       |
| [P].QPKVLPPIPQQVVPYPQ.[R]_                           | P05814     |        |              |          |         |          | 75225    | 63883        | 79674    | 24293    |          |         |              |          |         |          |         |              |          |         |          |       |
| [P].QPLYPFVEPIPIYGFLP.[Q]_                           | P05814     |        |              |          |         |          |          |              |          |          |          | 229535  | 257515       | 257124   | 228357  | 87265    |         |              |          |         |          |       |
| [P].QPLYPFVEPIPIYGFLPQ.[N]_                          | P05814     |        |              |          |         |          |          |              |          |          |          | 152848  | 126954       | 177135   | 151798  | 79297    |         |              |          |         |          |       |
| [P].QPLYPFVEPIPIYGFLPQN.[I]_                         | P05814     |        |              |          |         |          |          |              |          |          |          | 27975   |              | 20209    | 23123   | 23587    |         |              |          |         |          |       |
| [P].QPLYPFVEPIPIYGFLPQNI.[L]_                        | P05814     |        |              |          |         |          |          |              |          |          |          |         |              | 52913    |         | 42159    |         |              |          |         |          |       |
| [P].QPLWSVPQPKVLPPIPQQ.[V]_                          | P05814     |        |              |          |         |          |          |              |          |          |          | 12385   |              | 24586    |         | 54248    |         |              |          |         |          |       |
| [P].QPLWSVPQPKVLPPIPQQVVPYPQ.R.[A]_                  | P05814     |        |              |          |         |          |          |              |          |          |          | 109499  |              |          | 95464   | 71491    |         |              |          |         |          |       |
| [P].QQVVVPYPQRAV.PVQA.[L]_                           | P05814     |        |              |          |         |          |          |              |          |          |          |         |              |          |         |          |         |              |          |         |          |       |
| [P].QTLALPPQPLWSVPQPKVLPPIPQQVVPYPQR.[A]_            | P05814     |        |              |          |         |          |          |              |          |          |          | 23902   | 55628        | 63583    | 24673   | 60979    |         |              |          |         |          |       |
| [P].RLF.AEEKAVADTR.[D]_                              | P01833     |        |              | 37086    | 47419   | 47550    | 19882    | 24852        |          | 14851    | 24176    |         |              |          |         |          |         |              |          |         |          |       |
| [P].SOWDSRGK.[D]_                                    | P10451     |        |              |          |         |          |          |              |          |          |          | 30914   | 37644        | 36743    | 22900   | 19981    |         |              |          |         |          |       |
| [P].SESSEPIPLESREYYMNGMNR.[Q]_                       | P47710     |        |              |          |         |          | 144244   | 197009       | 199386   | 301011   | 348769   | 240946  | 226538       | 289543   | 293051  | 245450   |         |              |          |         |          |       |
| [P].SFQOPQLIYPFVEPIPIYGFLP.[Q]_                      | P05814     |        |              |          |         |          |          |              |          |          |          |         |              | 26591    | 56960   | 69946    |         |              |          |         |          |       |
| [P].SNDIYGGEMHVRPML.[S]_                             | Q16625     |        |              |          |         |          |          |              |          |          |          | 41067   | 43052        | 42931    | 22018   | 33327    |         |              |          |         |          |       |

| Quantified modified peptide sequence                      | Protein ID     | A_-80oC | A_-20oC_120h | A_4oC_6h | A_RT_6h | A_RT_24h | B_-80oC | B_-20oC_120h | B_4oC_6h | B_RT_6h | B_RT_24h | C_-80oC | C_-20oC_120h | C_4oC_6h | C_RT_6h | C_RT_24h | D_-80oC | D_-20oC_120h | D_4oC_6h | D_RT_6h | D_RT_24h |
|-----------------------------------------------------------|----------------|---------|--------------|----------|---------|----------|---------|--------------|----------|---------|----------|---------|--------------|----------|---------|----------|---------|--------------|----------|---------|----------|
| [P].TIFFDPQIPK.[L]_                                       | P05814         |         |              |          |         |          | 1364415 | 1270327      | 435403   | 1925876 | 2018348  |         |              |          |         |          |         |              |          |         |          |
| [P].TIFFDPQIPKL.[T]_                                      | P05814         |         |              |          |         |          | 147404  | 105513       |          | 36941   | 45967    | 46841   |              | 61288    |         | 134488   |         |              |          |         |          |
| [P].TIFFDPQIPKLT.D.[L]_                                   | P05814         |         |              |          |         |          | 152640  | 132032       |          | 84495   | 92227    |         |              | 64738    | 175667  | 310493   |         |              |          |         |          |
| [P].TIFFDPQIPKLT.DLEN.[H]_                                | P05814         |         |              |          |         |          |         |              |          |         |          |         |              |          |         | 39632    |         |              |          |         |          |
| [P].TIFFDPQIPKLT.DLEN.LHLPL.L.[L]_                        | P05814         |         |              |          |         |          |         |              |          |         |          |         | 76455        | 41193    | 106071  | 38091    | 65630   |              |          |         |          |
| [P].TIFFDPQIPKLT.DLEN.LHLPL.LQLP.L.[M]_                   | P05814         |         |              |          |         |          |         |              |          |         |          | 445758  | 375210       | 369742   | 287974  | 248824   |         |              |          |         |          |
| [P].TIFFDPQIPKLT.DLEN.LHLPL.LLQLP.L.[Q]_1xOxidation [M29] | P05814         |         |              |          |         |          |         |              |          |         |          | 131740  | 145281       | 148948   |         | 58063    |         |              |          |         |          |
| [P].TIFFDPQIPKLT.DLEN.LHLPL.LLQLP.LM.Q.[Q]_               | P05814         |         |              |          |         |          |         |              |          |         |          | 1207990 | 958038       | 914338   | 784159  | 569161   |         |              |          |         |          |
| [P].TPSGTINVSSGRSPSKAVA.[A]_                              | P60468         |         |              |          |         |          |         |              |          |         |          | 37308   | 56205        | 48540    | 54734   | 34124    | 26054   | 17111        | 14159    | 16111   |          |
| [P].VAQDLNAPSDWDSR.[G]_                                   | P10451         |         |              |          |         |          | 52692   | 71457        |          | 91903   | 74142    |         |              |          |         |          |         |              |          |         |          |
| [P].VAQDLNAPSDWDSR.GK.[D]_                                | P10451         |         |              |          |         |          | 111810  | 97705        | 95960    | 66165   | 49274    |         |              |          |         |          |         |              |          |         |          |
| [P].VAQDLNAPSDWDSR.GKDS.[Y]_                              | P10451         |         |              |          |         |          |         |              |          |         |          |         |              |          |         |          |         |              |          |         |          |
| [P].VAQDLNAPSDWDSR.GKDSYETS.[Q]_                          | P10451         |         |              |          |         |          |         |              |          |         |          | 313035  | 302678       | 257191   | 189962  | 128159   |         |              |          |         |          |
| [P].VKQADSGSSEKQLYNYKYPDAVATWLNPDPSQ.[K]_                 | P10451         |         |              |          |         |          |         |              |          |         |          |         |              | 55748    | 34630   | 22123    |         |              |          |         |          |
| [P].VLKSPITIFFDPQIPKL.[T]_                                | P05814         |         |              |          |         |          |         |              |          |         |          |         |              |          |         | 27590    |         |              |          |         |          |
| [P].VLKSPITIFFDPQIPKLT.D.[L]_                             | P05814         |         |              |          |         |          |         |              |          |         |          |         |              |          |         | 66468    |         |              |          |         |          |
| [P].VLKSPITIFFDPQIPKLT.DL.[E]_                            | P05814         |         |              |          |         |          |         |              |          |         |          |         |              |          |         |          | 26676   | 23754        | 36082    | 90433   |          |
| [P].VLKSPITIFFDPQIPKLT.DLEN.[L]_                          | P05814         |         |              |          |         |          |         |              |          |         |          |         |              |          | 88077   | 1618190  |         |              |          |         |          |
| [P].VLKSPITIFFDPQIPKLT.DLEN.LHLPL.L.[L]_                  | P05814         |         |              |          |         |          | 172656  | 173886       |          |         | 102132   |         |              |          |         |          |         |              |          |         |          |
| [P].VLKSPITIFFDPQIPKLT.DLEN.LHLPL.L.[L]_                  | P05814         |         |              |          |         |          | 50135   | 45796        | 155588   | 13822   | 80344    |         |              |          |         |          |         |              |          |         |          |
| [P].VPDLVPGNFK.[S]_                                       | P02671         | 101386  | 173537       | 240944   | 29972   |          | 118069  | 129037       | 115216   | 65498   |          | 22496   | 93675        | 14979    | 24184   | 32194    |         |              |          |         |          |
| [P].VPQPEIMEVPKAKDT.[V]_1xOxidation [M7]                  | P05814         |         |              |          |         |          | 52547   | 48831        | 101283   | 36712   | 11858    |         |              |          |         |          |         |              |          |         |          |
| [P].VPQPEIMEVPKAKDTVYTK.[G]_                              | P05814         | 84320   |              | 190765   | 35856   |          |         |              |          |         |          |         |              |          |         |          |         |              |          |         |          |
| [P].VQALLNQELLNPTHQIYPVTQPLAPVH.[N]_                      | P05814         |         |              |          |         |          |         |              |          |         |          |         |              |          |         |          |         |              |          |         |          |
| [P].VQALLNQELLNPTHQIYPVTQPLAPVHN.[P]_                     | P05814         |         |              |          |         |          |         |              |          |         |          | 423901  | 393096       | 381330   | 443887  | 399369   |         |              |          |         |          |
| [P].WVEQEGPEYWDRETQKY.[K]_                                | P30510         |         |              |          |         |          |         |              |          |         |          | 72407   | 79645        | 57493    | 100183  | 129116   | 16770   | 15815        | 20612    | 16066   |          |
| [P].YEKVSAGNGSSSL.[S]_                                    | P15941         |         |              |          |         |          |         |              |          |         |          |         |              |          |         |          | 29217   | 25433        |          |         |          |
| [P].YEKVSAGNGSSSLY.[T]_                                   | P15941         |         |              |          |         |          |         |              |          |         |          |         |              |          |         |          | 45491   | 49668        | 29224    | 17833   |          |
| [P].YGFLPQNILPLAQPAVVLPVPQPEIMEVPKA.[K]_                  | P05814         |         |              |          |         |          | 73278   | 47343        | 274202   |         | 36679    | 80577   | 79389        | 47888    | 53961   |          |         |              |          |         |          |
| [P].YGFLPQNILPLAQPAVVLPVPQPEIMEVPKAK.[D]_                 | P05814         |         |              |          |         |          | 162845  | 140063       | 441589   | 33656   | 136244   | 36057   | 46273        | 36342    | 20398   | 41413    |         |              |          |         |          |
| [P].YGFLPQNILPLAQPAVVLPVPQPEIMEVPKAKDTVYT.[K]_            | P05814         |         |              |          |         |          | 269995  | 442960       | 341694   | 317807  | 586627   |         |              |          |         |          |         |              |          |         |          |
| [Q].AAHAQEQIRR.[M]_                                       | P47710         |         |              |          |         |          | 385264  | 417857       | 444139   | 1144766 | 1379692  | 63721   | 90569        | 55397    | 106242  | 202136   | 26394   | 12205        | 14396    | 7640    |          |
| [Q].ADGSRASVDSGSSEEQGGSS.[R]_                             | P01833         |         |              |          |         |          |         |              |          |         |          |         |              |          |         |          | 130170  | 217393       | 161228   | 86973   |          |
| [Q].ADGSRASVDSGSSEEQGGSSR.[A]_                            | P01833         |         |              |          |         |          | 74398   | 117466       | 130593   | 49581   | 8491     | 76307   | 94666        | 88109    | 57560   | 34505    | 139972  | 148499       | 156512   | 121877  |          |
| [Q].ADGSRASVDSGSSEEQGGSSRALYST.[L]_                       | P01833         |         |              |          |         |          |         |              |          |         |          | 217607  | 230240       | 217249   | 203296  | 100152   | 400100  | 364739       | 362854   | 346585  |          |
| [Q].ADGSRASVDSGSSEEQGGSSRALYSTVLPLG.[L]_                  | P01833         |         |              |          |         |          |         |              |          |         |          |         |              |          |         |          |         |              |          | 234253  |          |
| [Q].ALLNQELLNPTH.[Q]_                                     | P05814         |         |              |          |         |          |         |              |          |         |          | 124901  | 74185        |          | 69572   | 77560    |         |              |          |         |          |
| [Q].ALLNQELLNPTHQIYPVT.[Q]_                               | P05814         |         |              |          |         |          | 131464  | 129221       | 132517   | 116754  | 132344   | 84254   | 82301        | 78926    | 535546  | 1596122  | 168086  |              |          | 938876  |          |
| [Q].ALLNQELLNPTHQIYPVTQPL.[P]_                            | P05814         |         |              |          |         |          | 90830   | 76323        | 99808    | 85564   | 111874   | 37504   | 30744        | 55472    | 174002  | 1006487  |         |              | 41761    | 231346  |          |
| [Q].ALLNQELLNPTHQIYPVTQPLAPVH.[N]_                        | P05814         |         |              |          |         |          |         |              |          |         |          | 131040  | 136069       | 137478   | 199528  | 1622788  | 62618   | 71089        | 102843   | 232088  |          |
| [Q].DAYDGDYIALNEDLR.[S]_                                  | P13746; P30443 |         |              |          |         |          |         |              |          |         |          |         |              |          |         |          | 33267   | 27219        | 25316    | 34253   |          |
| [Q].DEPPQSPWDRVKDLATVYVDVL.[K]_                           | P02647         |         |              |          |         |          |         |              |          |         |          | 56392   |              | 55910    |         | 17432    |         |              |          |         |          |
| [Q].DEPPQSPWDRVKDLATVYVDVLK.[D]_                          | P02647         |         |              |          |         |          | 133048  | 122693       |          | 95151   | 85471    | 434694  | 368164       | 399809   | 401951  | 293915   |         |              |          |         |          |
| [Q].DLNAPSDWDSR.[G]_                                      | P10451         |         | 93162        |          |         |          | 47954   | 74100        | 44996    | 154312  | 215629   | 31857   | 37157        | 43882    | 54180   | 27761    |         |              |          |         |          |
| [Q].DLNAPSDWDSRG.[K]_                                     | P10451         |         |              |          |         |          |         |              |          |         |          |         |              |          |         |          |         |              |          |         |          |
| [Q].DLNAPSDWDSRGKD.[S]_                                   | P10451         |         |              |          |         |          | 572217  | 460614       | 98096    | 462045  | 187376   | 73000   | 71326        | 74808    | 87949   | 70033    |         |              |          |         |          |
| [Q].DLNAPSDWDSRGKDSYETSQ.[L]_                             | P10451         |         |              |          |         |          |         |              |          |         |          | 43522   | 46116        | 46201    | 31800   |          |         |              |          |         |          |
| [Q].DPRLFAEE.[K]_                                         | P01833         |         |              |          |         |          | 140252  | 124350       |          | 112222  | 61927    |         |              |          |         |          |         |              |          |         |          |
| [Q].DPRLFAEEKA.[V]_                                       | P01833         |         |              |          |         |          | 27052   |              |          | 24788   | 28049    |         |              |          |         |          |         |              |          |         |          |
| [Q].DPRLFAEEKAVA.[D]_                                     | P01833         |         |              |          |         |          | 30049   | 46751        |          | 69091   | 172344   |         |              |          |         |          |         |              |          |         |          |
| [Q].DPRLFAEEKAVADTRDQ.[A]_                                | P01833         |         |              |          |         |          | 328644  | 426986       | 354176   | 207298  | 125770   | 4272161 | 4174771      | 3792117  | 3332714 | 1984695  | 683353  | 763062       | 717827   | 450367  |          |
| [Q].EAEQMPEYR.[G]_                                        | Q13410         |         |              |          |         |          | 62752   | 85247        |          | 40537   | 22192    | 41522   | 42082        | 35505    | 38608   | 13976    | 196670  | 273500       | 236625   | 178996  |          |
| [Q].EAEQMPEYRGR.[A]_                                      | Q13410         |         |              |          |         |          | 109378  | 133595       | 120457   | 48229   |          |         |              |          |         |          |         |              |          |         |          |
| [Q].ELLNPTH.[Q]_                                          | P05814         |         |              |          |         |          | 140298  | 114882       |          | 40921   | 50362    | 47133   | 58774        | 55145    | 76169   | 87818    |         |              |          |         |          |
| [Q].ELLNPTHQIYP.[V]_                                      | P05814         |         |              |          |         |          | 258063  | 238469       | 125719   | 163764  | 253454   |         |              |          |         |          |         |              |          |         |          |
| [Q].ELLNPTHQIYPVT.[Q]_                                    | P05814         |         |              |          |         |          | 934473  | 844160       | 428886   | 1422360 | 2145273  | 144495  | 146257       | 242901   | 1651061 | 7798386  |         |              |          | 1436951 |          |
| [Q].ELLNPTHQIYPVTQPL.[L]_                                 | P05814         |         |              |          |         |          |         |              |          |         |          | 52906   | 58861        | 60135    | 92457   | 896616   |         |              |          |         |          |
| [Q].ELLNPTHQIYPVTQPL.[A]_                                 | P05814         |         |              |          |         |          |         |              |          |         |          |         |              |          |         | 585407   |         |              |          |         |          |
| [Q].ELLNPTHQIYPVTQPLA.[P]_                                | P05814         |         |              |          |         |          |         |              |          |         |          |         |              |          |         | 61389    |         |              |          |         |          |
| [Q].ELLNPTHQIYPVTQPLAP.[V]_                               | P05814         |         |              |          |         |          |         |              |          |         |          |         |              |          |         | 147909   |         |              |          |         |          |
| [Q].ELLNPTHQIYPVTQPLAPVHN.[P]_                            | P05814         |         |              |          |         |          |         |              |          |         |          | 153054  | 153071       | 148369   | 200504  | 68723    |         |              |          |         |          |
| [Q].EMVSSAKDVTATQL.[S]_                                   | O60664         |         |              |          |         |          |         |              |          |         |          | 65067   | 49032        | 63504    | 43339   | 68723    |         |              |          |         |          |
| [Q].EPPEHMAELQRNEQEQLPGQWHLS.[K]_                         | O00391         |         |              |          |         |          | 61898   | 63487        |          |         |          | 37748   | 31586        | 32648    | 27514   | 17174    |         |              |          |         |          |
| [Q].EQAEMKY.[S]_1xOxidation [M7]                          | Q96JH7         |         |              |          |         |          | 256403  | 323578       | 143957   | 209661  | 75581    | 109809  | 117490       | 89983    | 81209   | 38713    |         |              |          |         |          |
| [Q].FSLGSKINVKVGGNSKGT.K.[V]_                             | P0C0L4         |         |              |          |         |          |         |              |          |         |          | 137756  | 136868       | 125759   | 105913  | 34934    |         |              |          |         |          |
| [Q].GEDEHQDKIYP.[S]_                                      | P05814         |         |              |          |         |          | 1204346 | 1510079      | 3014728  | 1792774 | 1760484  | 81054   | 113807       | 71314    | 73788   | 52609    |         |              |          |         |          |
| [Q].GEDEHQDKIYFS.[F]_                                     | P05814         |         |              |          |         |          | 89578   | 112614       | 108317   | 90349   | 62682    | 139749  | 201040       | 118497   | 145566  | 179661   | 91094   | 137428       | 120764   | 65589   |          |
| [Q].GEDEHQDKIYPSF.[Q]_                                    | P05814         |         |              |          |         |          | 28785   |              |          | 22468   | 20218    | 205987  | 219799       | 216073   | 216486  | 153293   |         |              |          |         |          |
| [Q].GEDEHQDKIYPSFQPPQ.[L]_                                | P05814         |         |              |          |         |          | 46979   | 50716        |          | 39338   | 54880    | 29942   | 39683        | 29603    | 25292   | 25949    |         |              |          |         |          |
| [Q].GEDEHQDKIYPSFQPPQL.[Y]_                               | P05814         |         |              |          |         |          | 95097   | 104367       |          | 103667  | 78055    | 32567   |              | 31596    | 53707   | 63760    |         |              |          |         |          |
| [Q].GGSSRALYSTVLPLG.[L]_                                  | P01833         |         |              |          |         |          |         |              |          |         |          | 167591  | 209698       | 192037   | 140801  | 164450   | 163679  | 171401       | 151926   | 212099  |          |
| [Q].GPPPPPGKPK.[G]_                                       | P02810         |         |              |          |         |          |         |              |          |         |          |         |              |          |         |          |         |              |          |         |          |
| [Q].GPPPGGGRPQGPP.[Q]_                                    | P02810         |         |              |          |         |          |         |              |          |         |          |         |              |          |         |          |         |              |          |         |          |
| [Q].GPPPGGGRPQGPPQGSPQ.[-]_                               | P02810         |         |              |          |         |          |         |              |          |         |          | 71469   | 88277        | 78659    | 54416   | 10793    |         |              |          |         |          |
| [Q].GPPQGCGHPPPP.[Q]_                                     | P02810         |         |              |          |         |          |         |              |          |         |          |         |              |          |         | 32632    |         |              | 24216    | 19017   |          |

| Quantified modified peptide sequence    | Protein ID | A_80oC | A_-20oC_120h | A_4oC_6h | A_RT_6h | A_RT_24h | B_-80oC | B_-20oC_120h | B_4oC_6h | B_RT_6h | B_RT_24h | C_-80oC | C_-20oC_120h | C_4oC_6h | C_RT_6h | C_RT_24h | D_-80oC | D_-20oC_120h | D_4oC_6h | D_RT_6h | D_RT_24h |
|-----------------------------------------|------------|--------|--------------|----------|---------|----------|---------|--------------|----------|---------|----------|---------|--------------|----------|---------|----------|---------|--------------|----------|---------|----------|
| [Q]_GPPQQGGHPPPPQ.[G]_                  | P02810     |        |              |          |         |          |         |              |          |         |          |         |              |          |         |          |         |              |          |         |          |
| [Q]_GPPQQGGHPPPPQG.[R]_                 | P02810     |        |              |          |         |          |         |              |          |         |          |         | 68570        | 108419   | 146084  | 116500   | 41358   | 27508        | 45684    |         |          |
| [Q]_GVPPQNIQDQAKHMGVM.[A]_              | Q09541     |        |              |          |         |          |         |              |          |         |          |         | 29944        | 29295    | 32251   |          | 18891   |              | 40205    | 31296   | 27534    |
| [Q]_GVPPQNIQDQAKHMGVMA.[G]_             | Q09541     |        |              |          |         |          |         |              |          |         |          |         | 76976        | 77361    | 69935   | 60940    | 36260   |              |          |         | 18219    |
| [Q]_GVQVQVSTSNSSLEGARGLIA.[E]_          | P49327     |        |              |          |         |          |         |              |          |         | 35334    |         |              |          |         |          |         |              |          |         |          |
| [Q]_IPKLTDL.[N]_                        | P05814     |        |              |          |         |          |         |              |          |         |          |         |              | 42162    | 35213   | 53631    | 97569   |              |          |         |          |
| [Q]_IPKLTDLNL.[H]_                      | P05814     |        |              |          |         |          | 38961   | 29034        | 37161    |         | 504348   |         | 22491        | 26151    | 33300   | 50551    | 86559   |              |          |         |          |
| [Q]_IPKLTDLNLH.[L]_                     | P05814     |        |              |          |         |          | 40709   | 32730        |          | 26074   |          |         | 337831       | 326806   | 364300  | 340334   | 275349  |              |          |         |          |
| [Q]_IPKLTDLNLHL.P.[L]_                  | P05814     |        |              |          |         |          |         |              |          |         |          |         | 74092        | 73934    | 60911   | 126150   | 55985   |              |          |         |          |
| [Q]_IPKLTDLNLHLPL.P.[L]_                | P05814     |        |              |          |         |          | 226918  |              |          |         | 253623   |         | 348676       | 239610   | 322909  | 403776   | 545755  |              |          |         |          |
| [Q]_IPKLTDLNLHLPLPL.[Q]_                | P05814     |        |              |          |         |          |         |              |          |         |          |         | 42071        | 62749    | 58758   |          |         |              |          |         |          |
| [Q]_IPKLTDLNLHLPLPLLO.P.[L]_            | P05814     |        |              |          |         |          | 100462  |              |          | 74213   | 52176    |         | 233254       | 223700   | 227586  | 163109   | 106813  |              |          |         |          |
| [Q]_IPKLTDLNLHLPLPLLO.PLM.[Q]_          | P05814     |        |              |          |         |          |         | 48244        |          | 45455   |          |         | 388266       | 359302   | 364948  | 351783   | 228146  |              |          |         |          |
| [Q]_IPKLTDLNLHLPLPLLO.PLMQ.[Q]_         | P05814     |        |              |          |         |          |         |              |          |         |          |         | 287560       | 253847   | 263075  | 217902   | 164587  |              |          |         |          |
| [Q]_IPKLTDLNLHLPLPLLO.PLMQQVPQIPQT.[L]_ | P05814     |        |              |          |         |          |         |              |          |         |          |         | 82728        | 128520   | 83558   | 93663    | 74784   |              |          |         |          |
| [Q]_IPQRCQVLPNS.[H]_                    | P07498     |        |              |          |         |          |         |              |          |         |          |         | 78347        | 61749    | 37910   | 52951    |         |              |          |         |          |
| [Q]_IYPVTQPLAPVHNPI.[V]_                | P05814     |        |              |          |         |          |         |              |          |         |          |         | 57269        | 72126    | 62252   | 43642    | 54409   |              |          |         |          |
| [Q]_KDELLLQAAQPSLQLSQTKS.[P]_           | O15016     |        |              |          |         |          |         |              |          |         |          |         | 554516       | 586467   | 642744  | 964876   | 1400253 |              |          |         |          |
| [Q]_KPSYYVRLG.[S]_                      | Q09541     |        |              |          |         |          | 199620  | 215121       | 695303   | 487606  | 137059   |         | 9172982      | 10288537 | 6961920 | 5860180  | 3772007 |              |          |         |          |
| [Q]_KPSYYVRLGSL.[T]_                    | Q09541     |        |              |          |         |          |         |              |          |         |          |         | 335314       | 404562   | 477608  | 212979   | 108036  |              |          |         |          |
| [Q]_LDDQSAETHSHK.[Q]_                   | P10451     |        |              |          |         |          |         |              |          |         |          |         | 87187        | 114006   | 87908   | 100406   | 74359   |              |          |         |          |
| [Q]_LDDQSAETHSHKQ.[S]_                  | P10451     |        |              |          |         |          |         |              |          |         |          |         | 39540        | 51123    | 41991   | 43223    | 32157   |              |          |         |          |
| [Q]_LDDQSAETHSHKQS.[R]_                 | P10451     |        |              |          |         |          |         |              |          |         |          |         | 315136       | 301169   | 279626  | 213255   | 140577  |              |          |         |          |
| [Q]_LDDQSAETHSHKQSLY.[K]_               | P10451     |        |              |          |         |          |         |              |          |         |          |         | 1811194      | 2124434  | 2035265 | 1641298  | 1086832 |              |          |         |          |
| [Q]_LVGVSTPLQGGSNAAAIGQSSGELR.[T]_      | P15291     | 63299  |              | 42555    |         | 27169    | 89105   | 78135        | 163721   | 108690  | 40381    |         |              |          |         |          |         | 20866        | 21777    |         |          |
| [Q]_LVSSGVENALTK.[S]_                   | Q09541     |        |              |          |         |          |         |              |          |         |          |         |              |          |         |          |         |              |          |         |          |

| Quantified modified peptide sequence                   | Protein ID     | A_–80oC | A_–20oC_120h | A_4oC_6h | A_RT_6h | A_RT_24h | B_–80oC | B_–20oC_120h | B_4oC_6h | B_RT_6h | B_RT_24h | C_–80oC | C_–20oC_120h | C_4oC_6h | C_RT_6h | C_RT_24h | D_–80oC | D_–20oC_120h | D_4oC_6h | D_RT_6h | D_RT_24h |
|--------------------------------------------------------|----------------|---------|--------------|----------|---------|----------|---------|--------------|----------|---------|----------|---------|--------------|----------|---------|----------|---------|--------------|----------|---------|----------|
| [Q].SGVDKTKSVVTGGVQSVMGSR.LG.[Q]_                      | O60664         |         |              |          |         |          |         |              |          |         |          | 65861   | 76631        | 75131    | 51932   | 131244   |         |              |          |         |          |
| [Q].SPPRALRPAAVSSSQDQLR.[K]_                           | Q8I2A0         |         |              |          |         |          |         |              |          |         |          | 26588   |              |          |         | 33361    |         |              |          |         |          |
| [Q].TLALPPQLWVSPQP.[K]_                                | P05814         |         | 21651        | 25901    | 45147   | 49813    | 40608   | 38671        |          | 86491   | 250410   |         |              |          |         |          |         |              |          |         |          |
| [Q].TLEGGVEKPHSL.[S]_                                  | P01133         |         |              |          |         |          |         |              |          |         |          |         |              | 33476    |         | 11014    |         |              |          |         |          |
| [Q].VPQPIQTLALPPQLWVSPQP.[K]_                          | P05814         |         |              |          |         |          |         |              |          |         |          | 15017   |              |          |         |          |         |              |          |         |          |
| [Q].VVPYPQRAVPVQ.[A]_                                  | P05814         |         |              |          |         |          | 62780   | 53963        | 186955   | 46879   | 45722    | 1235701 | 997000       | 1207104  | 1079009 | 833096   |         |              |          |         |          |
| [Q].VVPYPQRAVPVQA.[L]_                                 | P05814         |         |              |          |         |          | 70265   | 70767        |          | 45396   | 49598    | 112757  | 120864       | 146938   | 404733  | 738837   | 26928   | 31628        | 22212    | 42578   | 172972   |
| [Q].VVPYPQRAVPVQALLN.[Q]_                              | P05814         |         |              |          |         |          |         |              |          |         |          | 59843   | 84010        | 90244    | 128857  | 312037   |         |              |          |         |          |
| [Q].VVPYPQRAVPVQALLNQE.[L]_                            | P05814         |         |              |          |         |          |         |              |          |         |          | 21562   | 28142        | 17678    |         | 318100   |         |              |          |         |          |
| [Q].YPLTLEEELEAKKVEGFDLV.[Q]_                          | P05814         |         |              |          |         |          |         |              |          |         |          | 127655  | 191101       | 148996   | 118594  | 133718   | 187776  | 110702       | 191853   | 326768  | 291867   |
| [Q].YLPNSHPPTVVR.[R]_                                  | Q99541         |         |              |          |         |          |         |              |          |         |          | 219198  | 206091       | 175419   | 126408  | 112583   |         |              |          |         |          |
| [Q].YPDATDEDITSHM.[E]_                                 | P07498         |         |              |          |         |          |         |              |          |         |          | 45812   | 60866        | 102811   | 36186   | 34188    |         |              |          |         |          |
| [Q].YPDATDEDITSHMESEELNGAY.[K]_                        | P10451         |         |              |          |         |          | 109916  | 137178       | 72665    | 63930   | 42640    |         |              |          |         |          |         |              |          |         |          |
| [Q].YVRTLPNT.[L]_                                      | P10451         |         |              |          |         |          |         |              |          |         |          | 68480   | 57335        | 71897    | 29888   | 22529    |         |              |          |         |          |
| [R].AAEDDEDDVDTKK.[Q]_                                 | P33121         |         |              |          |         |          |         |              |          |         |          | 27399   | 37867        | 31668    | 26571   | 6838     | 26494   | 30618        | 22912    | 22954   |          |
| [R].AAPGQEPPEHMAELQ.[R]_                               | P06454         |         |              |          |         |          | 368472  |              |          |         |          |         |              |          |         |          |         |              |          |         |          |
| [R].AAPGQEPPEHMAELQRNEQEQLGQWHL.S.[K]_1xOxidation [M]_ | O00391         |         |              |          |         |          |         |              |          |         |          |         |              |          |         |          | 27131   | 65902        | 33311    | 27830   |          |
| [R].ALQNGAGPPIKVKCAN.[–]_                              | Q00391         |         |              |          |         |          |         |              |          |         |          |         |              |          |         |          | 9199    |              | 46341    | 47538   |          |
| [R].APWIEQEGPEYWDQETR.[N]_                             | Q9BW60         |         |              |          |         |          | 104022  | 77436        |          |         |          |         |              |          |         |          |         |              |          |         |          |
| [R].APWMEQEGSEYWDRETR.[S]_                             | P13746; P30443 |         |              |          |         |          |         |              |          |         |          |         |              |          |         |          |         |              |          |         |          |
| [R].APWMEQEGSEYWDRETRSA.[R]_                           | P13747         |         |              |          |         |          |         |              |          |         |          |         |              |          |         |          | 43572   | 28954        | 30082    |         |          |
| [R].APWVEQEGPEYWDRETQNYK.[R]_                          | P13747         |         |              |          |         |          |         |              |          |         |          |         |              |          |         |          | 118287  | 111043       | 84304    | 33309   | 14708    |
| [R].ARSDALDLDLTPPTAESGSRSPTSNGGR.[S]_                  | Q07000         |         |              |          |         |          |         |              |          |         |          |         |              |          |         |          | 111383  | 118952       | 102387   | 50171   | 28943    |
| [R].ASVDSGSSEEQGSSRA.[L]_                              | Q07000         |         |              |          |         |          |         |              |          |         |          |         |              |          |         |          | 77350   | 92192        | 73734    | 49854   | 17640    |
| [R].ASVDSGSSEEQGSSRALVST.[L]_                          | Q86X29         |         |              |          |         |          | 52038   | 44695        |          | 43025   |          |         |              |          |         |          |         |              |          |         |          |
| [R].ATLVQDGIAGK.[R]_                                   | P01833         |         |              |          |         |          |         |              |          |         |          |         |              |          |         |          | 100109  | 55454        | 74853    | 39384   | 26459    |
| [R].ATLVQDGIAGRVA.[L]_                                 | Q13410         |         |              |          |         |          |         |              |          |         |          | 95392   | 77816        | 46958    | 36535   |          | 190015  | 166714       | 198572   | 135834  | 33781    |
| [R].ATSEVSPNSKPSPT.[K]_                                | Q13410         |         |              |          |         |          |         |              |          |         |          |         |              |          |         |          | 42866   | 57157        | 46829    |         |          |
| [R].AVPVQALLNQE.[L]_                                   | Q13410         |         |              |          |         |          |         |              |          |         |          |         |              |          |         |          | 50188   | 75953        | 45453    |         | 18958    |
| [R].AVPVQALLNQELLLNPT.[H]_                             | P12272         |         |              |          | 195675  | 18490    |         |              |          |         |          | 29848   | 26951        | 17170    |         | 69016    | 21786   | 17463        | 15329    | 32415   | 28299    |
| [R].AVPVQALLNQELLLNPTH.[Q]_                            | P05814         |         |              |          |         |          |         |              |          |         |          | 40043   | 50259        | 50300    | 50291   |          |         |              |          |         |          |
| [R].AVPVQALLNQELLLNPTHQ.[I]_                           | P05814         |         |              |          |         |          |         |              |          |         |          |         |              |          |         |          |         |              |          |         |          |
| [R].AVPVQALLNQELLLNPTHQIYVPTQPLAPV.[H]_                | P05814         |         |              |          |         |          | 127332  | 73499        |          | 110650  | 196579   | 52697   | 44307        | 55719    | 59245   | 93775    |         |              |          |         |          |
| [R].AVPVQALLNQELLLNPTHQIYVPTQPLAPVHN.[P]_              | P05814         |         |              |          |         |          | 352810  | 295428       | 314764   | 270401  | 214642   |         |              |          |         |          |         |              |          |         |          |
| [R].AVSEHQLLHDGKSIQDL.[R]_                             | P05814         |         |              |          |         |          |         |              |          |         |          | 190976  | 169068       |          | 192703  | 89841    |         |              |          |         |          |
| [R].AVSEHQLLHDGKSIQDLR.[R]_                            | P12272         |         |              |          |         |          | 51646   | 40068        | 61431    | 121062  | 70943    |         |              |          |         |          |         |              |          |         |          |
| [R].DADDLQKRLAVYQAGAREGAE.[R]_                         | P12272         |         |              |          |         |          | 36961   | 24805        |          | 89968   | 57223    |         |              |          |         |          |         |              |          |         |          |
| [R].DADTLHKSUPI.[Q]_                                   | P02649         |         |              |          |         |          | 124821  | 120426       | 226243   | 261722  | 53968    |         |              |          |         |          |         |              |          |         |          |
| [R].DADTLHKSUPIQ.[P]_                                  | Q13410         |         |              |          |         |          | 140109  | 162448       | 94539    | 92290   | 59328    | 658426  | 704793       | 782655   | 605266  | 368196   |         |              |          |         |          |
| [R].DDDKNNDGYIDYAEFAKSLQ.[–]_                          | Q13410         |         |              |          |         |          |         |              |          |         |          | 400871  | 458483       | 516437   | 339181  | 206157   |         |              |          |         |          |
| [R].DGREQAEQMPYE.[Y]_                                  | Q8N122         |         |              |          |         |          | 52067   | 52102        |          | 38318   | 26954    | 22924   | 32246        | 32954    | 25378   | 21568    | 22666   | 26490        | 19514    |         | 23827    |
| [R].DGREQAEQMPYGR.[R]_1xOxidation [M10]_               | Q13410         |         |              |          |         |          | 108247  | 128275       | 112923   | 87618   | 119430   | 150341  | 126176       | 129475   | 132737  | 31285    |         |              |          |         |          |
| [R].DGREQAEQMPYGRGR.[A]_1xOxidation [M10]_             | Q13410         |         | 22880        | 48880    | 72658   | 16786    | 48230   | 76931        | 67753    | 49158   | 16107    | 32941   | 31345        | 32432    | 33763   |          | 176441  | 183993       | 190851   | 99232   | 115417   |
| [R].DGREQAEQMPYGRGRAT.[L]_                             | Q13410         |         |              |          |         |          | 74009   | 123109       | 174429   | 65120   | 20345    |         | 37383        | 19867    |         | 24334    | 19505   | 13153        | 78298    |         | 29752    |
| [R].DMRQTVAVGVKAVDK.[K]_                               | Q13410         |         |              |          |         |          | 44202   | 34059        | 102712   | 24968   | 11365    | 71159   | 71329        | 65724    | 65011   | 64860    | 158961  | 169586       | 187400   | 684992  | 211956   |
| [R].DQADGSRASVD.[S]_                                   | P68104         |         |              |          |         |          | 98734   | 82031        | 72837    | 57496   | 85883    | 108845  | 108485       | 115311   | 72766   | 69281    | 74612   | 41873        | 43909    | 81244   | 47802    |
| [R].DRLDEVKEQVAE.[V]_                                  | P01833         |         |              |          |         |          |         |              |          |         |          | 27282   | 25180        | 25576    | 16940   | 11894    |         |              |          |         |          |
| [R].DRLDEVKEQVAE.[R]_                                  | P02649         |         |              |          |         |          | 75724   | 125322       | 133358   | 96817   | 50315    |         |              |          |         |          |         |              |          |         |          |
| [R].DRLDEVKEQVAEVR.[K]_                                | P02649         |         |              |          |         |          | 232940  | 252128       | 328559   | 186040  | 148533   |         |              |          |         |          |         |              |          |         |          |
| [R].DSILSFDEAVKPFGLK.[V]_                              | P02649         |         |              |          |         |          | 129030  | 121361       | 182432   | 110367  | 71087    |         |              |          |         |          |         |              |          |         |          |
| [R].DTSLSFDEFKVTSTNK.[V]_                              | P49327         |         |              |          |         |          | 47424   | 61414        | 55317    | 88005   | 87129    | 28412   |              | 45348    | 34599   | 29303    |         |              |          |         |          |
| [R].DTYHFMSEYPTYH.[T]_                                 | Q14672         |         |              |          |         |          | 60550   | 44755        | 71506    | 173738  | 130718   | 26875   |              | 33534    | 42019   | 26746    |         |              |          |         |          |
| [R].DVAVVAGGLGRQL.[L]_                                 | P15941         |         |              |          |         |          | 64829   | 71472        |          |         |          |         |              |          |         |          |         |              |          |         |          |
| [R].DVSLAKADAAPDEKVLDSGFR.[E]_                         | Q15904         |         |              |          |         |          |         |              |          |         |          |         |              |          |         |          |         |              |          |         |          |
| [R].DYAGALRPLT.[F]_                                    | P01833         |         |              |          |         |          |         |              |          |         |          | 71157   | 67227        | 57598    | 47129   |          | 117177  | 134529       | 122150   | 72051   | 67111    |
| [R].EDGSYEEALVHLK.[V]_                                 | O60543         |         |              |          |         |          |         |              |          |         |          | 70876   | 88658        | 62544    | 65674   | 37320    |         |              |          |         |          |
| [R].EAPSLRAPPPIGGGGYR.[A]_                             | Q13410         |         |              |          |         |          | 74026   | 66629        | 74084    | 91735   | 62985    |         |              |          |         |          |         |              |          |         |          |
| [R].EAYMNGMNR.[Q]_1xOxidation [M]_                     | P02675         |         |              |          |         |          | 95068   | 105533       |          | 79958   | 43029    | 31261   | 41563        | 38074    | 27830   | 25070    | 23294   | 22776        | 24413    | 23781   | 16833    |
| [R].EAYMNGMNRQ.[R]_                                    | P47710         |         |              |          |         |          | 112275  | 93833        | 77985    | 106706  | 26925    |         |              |          |         |          | 27116   | 37538        | 24790    |         | 16873    |
| [R].EAYMNGMNRQR.[N]_                                   | P47710         |         |              |          |         |          | 131812  | 125503       |          | 87097   | 73395    |         |              |          |         |          |         |              |          |         |          |
| [R].EAYMNGMNRQRN.[R]_                                  | P47710         |         |              |          |         |          | 217693  | 127237       |          | 196183  | 16140    |         |              |          |         |          |         |              |          |         |          |
| [R].EGAEGLSAIRER.[L]_                                  | P47710         |         |              |          |         |          | 878312  | 861679       | 405264   | 1071453 | 872343   |         |              |          |         |          |         |              |          |         |          |
| [R].EIKNAIQDPRLF.[A]_                                  | P02649         |         |              |          |         |          | 48231   | 30769        |          | 143157  | 69185    |         |              |          |         |          |         |              |          |         |          |
| [R].EKQTDKIDKTRNESTQN.[C]_                             | P01833         |         |              |          |         |          |         |              |          |         |          |         |              |          |         |          | 123295  | 149231       | 126134   | 97848   | 56242    |
| [R].ELDESILQVAER.[L]_                                  | P47710         |         |              |          |         |          |         | 15406        | 31566    | 17767   | 17164    |         |              |          |         |          |         |              |          |         |          |
| [R].ELDESILQVAERLT.[R]_                                | P10909         |         |              |          |         |          | 28150   | 26601        |          | 23718   | 33598    |         |              |          |         |          |         |              |          |         |          |
| [R].ELDESILQVAERLTRK.[Y]_                              | P10909         |         |              |          |         |          |         |              |          |         |          | 49052   | 45210        | 58182    | 51825   | 23377    |         |              |          |         |          |
| [R].ELDESILQVAERLTRKYNE.[L]_                           | P10909         |         |              |          |         |          | 212651  | 170197       | 205065   | 172303  | 172895   | 257456  | 222943       | 240815   | 169913  | 90543    |         |              |          |         |          |
| [R].ELDESILQVAERLTRKYNELL.[K]_                         | P10909         |         |              |          |         |          |         |              |          |         |          | 88919   | 91601        | 90257    | 79130   | 60546    |         |              |          |         |          |
| [R].ELDESILQVAERLTRKYNELLK.[S]_                        | P10909         |         |              |          |         |          | 392562  | 213294       | 236875   | 372655  | 522939   | 131418  | 51905        | 56348    | 179312  | 207491   |         |              |          |         |          |
| [R].EPQDTHYLPFSLPH.[R]_                                | P10909         |         |              |          |         |          |         |              |          |         |          | 29913   | 34722        | 32748    | 32809   | 64816    |         |              |          |         |          |
| [R].EPQDTHYLPFSLPHR.[R]_                               | P10909         |         |              |          |         |          | 60540   | 77956        |          | 43559   | 51415    |         |              |          |         |          |         |              |          |         |          |
| [R].EQAEQMPYR.[G]_                                     | P10909         |         |              |          |         |          | 31273   | 42726        |          | 36604   | 64627    | 30260   | 27485        | 30441    | 37896   | 23844    |         |              |          |         |          |
|                                                        | Q13410         |         |              |          |         |          | 60958   | 80474        |          | 43413   | 12480    | 58086   | 62412        | 48215    | 42754   | 15232    | 314906  | 314185       | 218153   | 134502  | 37392    |

| Quantified modified peptide sequence                 | Protein ID | A_80oC | A_-20oC_120h | A_4oC_6h | A_RT_6h | A_RT_24h | B_-80oC | B_-20oC_120h | B_4oC_6h | B_RT_6h | B_RT_24h | C_-80oC | C_-20oC_120h | C_4oC_6h | C_RT_6h | C_RT_24h | D_-80oC | D_-20oC_120h | D_4oC_6h | D_RT_6h | D_RT_24h |
|------------------------------------------------------|------------|--------|--------------|----------|---------|----------|---------|--------------|----------|---------|----------|---------|--------------|----------|---------|----------|---------|--------------|----------|---------|----------|
| [R].EQEAEQMPEYRGR.[A]_                               | Q13410     |        |              |          |         |          |         |              |          |         |          |         |              |          |         |          | 76412   | 94156        | 79181    | 36931   | 19827    |
| [R].ERLGLPVEQGRVR.[A]_                               | P02649     |        |              |          |         |          |         |              |          |         |          |         |              |          |         |          |         |              |          |         |          |
| [R].ETIESLSSEESITE.[Y]_                              | P05814     |        |              |          | 44668   | 34280    | 65004   | 64014        | 53371    | 96977   | 57296    |         |              |          |         |          |         |              |          |         |          |
| [R].ETIESLSSEESITEYKQKVEKVK.[H]_                     | P05814     |        |              |          |         |          | 54119   |              | 59450    |         |          | 46084   | 55354        | 54896    | 44169   | 35552    | 66281   | 48105        | 64611    | 32327   | 47754    |
| [R].ETIESLSSEESITEYKQKVEKVHEDQQQG.[E]_               | P05814     |        |              |          |         |          | 38472   | 21934        |          | 21333   |          | 137839  | 144606       | 126874   | 62244   | 74659    |         |              |          |         |          |
| [R].EVSRLQGTGGPS.[Q]_                                | O75888     |        |              |          |         |          | 87637   | 98213        | 40903    | 47783   | 10373    | 103185  | 127318       | 136446   | 108380  | 29148    | 265230  | 338114       | 303454   | 337525  | 188954   |
| [R].EVSRLQGTGGPSQNGEGYPW.[Q]_                        | O75888     |        |              |          |         |          |         |              |          |         |          |         |              |          |         |          | 21792   | 28314        | 22840    |         |          |
| [R].FPQATPRYDSKNGT.LV.[_]_                           | Q96A22     |        |              |          |         |          |         |              |          |         |          |         |              |          |         |          |         |              |          |         |          |
| [R].GAKTTDFDYTESWAQDPSQEN.[K]_                       | P19835     |        |              |          | 57249   | 228136   | 177872  | 149446       | 191741   | 445355  | 1011480  |         |              |          |         |          |         |              |          |         |          |
| [R].GLDKLEENL.PIL.[Q]_                               | O60664     |        |              |          |         |          |         |              |          |         |          |         |              |          |         |          |         |              |          |         |          |
| [R].GLEELQFSLGSKIN.[V]_                              | POCOL4     |        |              |          |         |          |         |              |          |         |          |         |              |          |         |          |         |              |          |         |          |
| [R].GLEELQFSLGSKINVKVGGNS.[K]_                       | POCOL4     |        |              |          |         |          |         |              |          |         |          |         |              |          |         |          |         |              |          |         |          |
| [R].GLEELQFSLGSKINVKVGGNS.[G]_                       | POCOL4     |        |              |          |         |          |         |              |          |         |          |         |              |          |         |          |         |              |          |         |          |
| [R].GLEELQFSLGSKINVKVGGNSKG.[T]_                     | POCOL4     |        |              |          |         |          |         |              |          |         |          |         |              |          |         |          |         |              |          |         |          |
| [R].GLEELQFSLGSKINVKVGGNSKGT.[L]_                    | POCOL4     |        |              |          |         |          |         |              |          |         |          |         |              |          |         |          |         |              |          |         |          |
| [R].GLEELQFSLGSKINVKVGGNSKGT.L.[K]_                  | POCOL4     |        |              |          |         |          |         |              |          |         |          |         |              |          |         |          |         |              |          |         |          |
| [R].GLEELQFSLGSKINVKVGGNSKGT.LK.[V]_                 | POCOL4     |        |              |          |         |          |         |              |          |         |          |         |              |          |         |          |         |              |          |         |          |
| [R].GPGTPAPTGLSAPLSFIPR.[H]_                         | Q6WVN34    |        | 133044       |          |         |          | 777789  | 758350       | 955754   | 645529  | 1238201  |         |              |          |         |          |         |              |          |         |          |
| [R].GPGTPAPTGLSAPLSFIPRHF.[R]_                       | Q6WVN34    |        |              |          | 84963   | 67338    | 193676  | 161680       | 156053   | 141616  | 195747   |         |              |          |         |          |         |              |          |         |          |
| [R].GPLVKYSSDYFQAPS DYR.[Y]_                         | Q08380     |        |              |          | 36043   |          | 34663   | 49792        | 49526    | 87769   | 283433   |         |              |          |         |          |         |              |          |         |          |
| [R].GRATLVQDGIA.[K]_                                 | Q13410     |        |              |          |         |          |         |              |          |         |          |         |              |          |         |          |         |              |          |         |          |
| [R].GRATLVQDGIAKG.[R]_                               | Q13410     |        |              |          |         |          | 62327   |              |          | 64469   | 31624    |         |              |          |         |          |         |              |          |         |          |
| [R].GRATLVQDGIAKGRVA.[L]_                            | Q13410     |        |              |          |         |          |         |              |          |         |          |         |              |          |         |          |         |              |          |         |          |
| [R].GVEEEEDGEMRE.[_]_1xOxidation [M11]               | P62306     |        |              |          |         |          | 37774   |              |          |         |          |         |              |          |         |          |         |              |          |         |          |
| [R].GWDQEPAREQAGGGW.[R]_                             | Q86X29     |        |              |          |         |          |         |              |          |         |          |         |              |          |         |          |         |              |          |         |          |
| [R].GWDQEPAREQAGGGWR.[A]_                            | Q86X29     |        |              |          |         |          |         |              |          |         |          |         |              |          |         |          |         |              |          |         |          |
| [R].GYDQSA YD GKDYALNEDLR.[S]_                       | P30510     |        |              |          |         |          |         |              |          |         |          |         |              |          |         |          |         |              |          |         |          |
| [R].HQGVMMVGMGQKDSYVGDEAQSK.[R]_                     | P60709     |        |              |          |         |          | 148102  | 157938       | 153226   | 212884  | 266803   | 77465   | 72840        | 92444    | 86815   | 111932   |         |              |          |         |          |
| [R].HQGVMMVGMGQKDSYVGDEAQSK.[R]_1xOxidation [M]      | P60709     |        |              |          |         |          |         | 81550        |          | 92239   | 96444    |         |              |          |         |          |         |              |          |         |          |
| [R].HQGVMMVGMGQKDSYVGDEAQSK.[R]_2xOxidation [M5; M8] | P60709     |        |              |          |         |          |         |              |          |         |          | 29745   |              |          |         | 13596    |         |              |          |         |          |
| [R].HRHPDEAAFFDTASTGK.[T]_                           | P02671     |        |              |          |         |          | 24549   | 20194        |          | 42067   | 38176    |         |              |          |         |          |         |              |          |         |          |
| [R].IEERLPIL.[N]_                                    | Q99541     |        |              |          |         |          |         |              |          |         |          |         |              |          |         |          |         |              |          |         |          |
| [R].KANDESNEHSDVIDSQELSK.[V]_                        | P10451     |        |              |          |         |          |         | 46890        | 81755    | 207198  | 182036   | 56721   | 46877        | 40365    | 30437   | 16295    |         |              |          |         |          |
| [R].KANDESNEHSDVIDSQELSKVS.[R]_                      | P10451     |        |              |          |         |          |         |              |          |         |          | 53958   | 91927        | 41266    | 120605  | 137218   |         |              |          |         |          |
| [R].KIHIDL PNE.[Q]_                                  | P62333     |        |              |          |         |          |         |              |          |         |          | 148099  | 142625       | 123794   | 112823  | 104024   |         |              |          |         |          |
| [R].KMDPAEEDTNVYTEKHSLSF.[K]_                        | P34741     |        |              |          |         |          |         |              |          |         |          | 27478   |              |          | 18713   | 29835    |         |              |          |         |          |
| [R].KMDPSKPSNNVAG.[V]_                               | P22897     |        |              |          | 26142   |          | 124817  |              | 198773   | 20357   |          |         |              |          |         |          |         |              |          |         |          |
| [R].KPTLDKPSPTFVK.[S]_                               | Q53GQ0     |        |              |          |         |          |         |              |          |         |          |         |              |          |         |          |         |              |          |         |          |
| [R].LDAPPPAAPLPRWSGPIGV.S.[W]_                       | Q99523     |        |              |          |         |          |         |              |          |         |          | 59117   | 65937        | 58473    | 56294   | 30119    |         |              |          |         |          |
| [R].LDINTNTYTSQDLK.[S]_                              | Q9H173     |        |              |          |         |          | 44336   | 38721        |          | 61343   | 22459    |         |              |          |         |          |         |              |          |         |          |
| [R].LFAEEKAVADT.[R]_                                 | P01833     |        |              |          |         |          |         |              |          |         | 48206    |         |              |          |         |          |         |              |          |         |          |
| [R].LFAEEKAVADTRD.[Q]_                               | P01833     |        |              |          |         |          | 32257   | 32196        |          | 28227   |          |         |              |          |         |          |         |              |          |         |          |
| [R].LFAEEKAVADTRDQ.[A]_                              | P01833     |        |              |          |         |          |         |              |          |         |          |         |              |          |         |          |         |              |          |         |          |
| [R].LFAEEKAVADTRDQADGSRASVDGSGSEEQGGSSR.[A]_         | P01833     |        |              |          |         |          |         |              | 30530    | 40078   | 19199    |         |              |          |         |          |         |              |          |         |          |
| [R].LLEDGEDFNLDALDSSNSMQTIQK.[T]_                    | P05783     |        |              |          |         |          | 105302  | 118000       |          | 69551   | 186484   |         |              |          |         |          |         |              |          |         |          |
| [R].LNEYNQLQLQAAHAQE.QI.[R]_                         | P47710     |        |              |          |         |          | 151331  | 119919       | 195872   | 324568  | 350425   |         |              |          |         |          |         |              |          |         |          |
| [R].LPEVEVPQHL.[_]_                                  | Q02818     |        |              |          |         |          | 51178   |              |          | 123923  | 145691   |         |              |          |         |          |         |              |          |         |          |
| [R].LQNPSESSEPIPLESREEYMNG.[M]_                      | P47710     |        |              |          |         |          |         |              |          |         |          | 39358   | 51323        | 57305    | 56678   | 41077    |         |              |          |         |          |
| [R].LQNPSESSEPIPLESREEYMNGM.[N]_                     | P47710     |        |              |          |         |          |         |              |          |         |          | 44621   | 52834        | 54046    | 61557   | 34258    |         |              |          |         |          |
| [R].LQNPSESSEPIPLESREEYMNGMN.[R]_1xOxidation [M]     | P47710     |        |              |          |         |          | 700149  | 820690       | 1172834  | 422279  | 417542   |         |              |          |         |          |         |              |          |         |          |
| [R].LQNPSESSEPIPLESREEYMNGMNRQRNIL.[R]_              | P47710     |        |              |          | 77821   |          |         |              |          |         |          |         |              |          |         |          |         |              |          |         |          |
| [R].MNENSHVQVPFQQL.[N]_                              | P47710     |        |              |          |         |          |         |              |          |         |          | 55019   | 43369        | 32714    | 64387   | 69897    |         |              |          |         |          |
| [R].MNENSHVQVPFQQLN.[Q]_                             | P47710     |        |              |          |         |          |         |              |          |         |          |         |              |          | 15022   | 14921    | 103447  |              |          |         |          |
| [R].MNENSHVQVPFQQLNQ.[L]_                            | P47710     |        |              |          |         |          |         |              |          |         |          | 81657   | 75292        | 81273    | 60526   | 35601    |         |              |          |         |          |
| [R].MNENSHVQVPFQQLNQL.[A]_                           | P47710     |        |              |          |         |          |         |              | 99407    | 248080  | 120726   |         |              |          |         |          |         |              |          |         |          |
| [R].MPELVDFRQY.[V]_                                  | P33121     |        |              |          |         |          |         |              |          |         |          |         |              |          | 23074   | 33337    | 23374   |              |          |         |          |
| [R].NAASFKEVSOSLLTSKGLQK.[M]_                        | Q99541     |        |              |          |         |          | 75062   | 53018        | 97157    | 77035   | 128007   | 81190   | 49120        | 102587   | 33597   | 37885    |         |              |          |         |          |
| [R].NEFSSKERLLEELKW.[K]_                             | Q13410     |        |              |          |         |          |         | 46790        |          | 42627   |          |         |              |          |         |          |         |              |          |         |          |
| [R].NEFSSKERLLEELKW.K.[K]_                           | Q13410     |        |              |          |         |          | 37903   |              |          | 57636   | 72928    |         |              |          |         |          |         |              |          |         |          |
| [R].NEQEQLGQWHLS.[K]_                                | O00391     |        |              |          |         |          |         |              |          |         |          |         |              |          |         |          |         |              |          |         |          |
| [R].NGFKSHALQ.[N]_                                   | POCOL4     |        |              |          |         |          |         |              |          |         |          |         |              |          |         |          |         |              |          |         |          |
| [R].NGFKSHALQLNNR.[Q]_                               | POCOL4     |        |              |          |         |          |         |              |          |         |          |         |              |          |         |          |         |              |          |         |          |
| [R].NGFKSHALQLNNRQIR.[G]_                            | POCOL4     |        | 24101        |          |         |          |         |              |          |         |          | 46947   | 78731        | 45791    | 25555   |          |         |              |          |         |          |
| [R].NILREKQTD EIKD.[T]_                              | P47710     |        |              |          |         |          |         |              |          |         |          | 266544  | 407388       | 272369   | 333173  | 366944   |         |              |          |         |          |
| [R].NNLKGRKLDINTNTYTSQDLK.[S]_                       | Q9H173     |        |              |          |         |          | 19703   | 30560        |          | 53053   | 34145    |         |              |          | 25658   | 44120    |         |              |          |         |          |
| [R].NQSPDQGATGASQGLLDRKEVLGGVIAGGLVG.[L]_            | P18827     |        |              |          |         |          |         |              |          |         |          |         |              |          |         |          |         |              |          |         |          |
| [R].NVNFKQKAIKEK.[L]_                                | POCOL4     |        |              |          |         |          |         |              |          |         |          | 140725  | 186659       | 169465   | 97633   | 58177    | 141676  | 154171       | 123689   | 131076  | 83980    |
| [R].NVNFKQKAIKEKLGQYASPTA.[K]_                       | POCOL4     |        |              |          |         |          |         |              |          |         |          |         |              |          |         |          |         |              |          |         |          |
| [R].NVNFKQKAIKEKLGQYASPTAK.[R]_                      | POCOL4     |        |              |          |         |          |         |              |          |         |          | 46945   | 60406        | 52550    | 50919   | 33699    |         |              |          |         |          |
| [R].PAGDGTGQKWA VVPVPSGGEQR.[Y]_                     | Q95604     |        |              |          |         |          |         |              |          |         |          | 32834   | 34022        | 23142    | 17444   | 13291    |         |              |          |         |          |
| [R].PAIANNPYVPR.[T]_                                 | P07498     |        |              |          |         |          | 65471   | 87109        | 125296   | 49811   | 111272   |         |              |          |         |          |         |              |          |         |          |
| [R].PAIANNPYVPRT.[Y]_                                | P07498     |        |              |          |         |          |         |              |          |         |          | 30499   | 35785        | 53390    | 33347   |          |         |              |          |         |          |
| [R].PAIANNPYVPRTY.[Y]_                               | P07498     |        |              |          |         |          |         |              |          |         |          | 47458   | 66925        | 135160   | 48052   | 18781    |         |              |          |         |          |
| [R].PDIIQYPDATDEITSHMESEELNGAYK.[A]_                 | P10451     |        |              |          |         |          | 410084  | 290503       | 238604   | 78981   | 273012   | 1127338 | 1171795      | 1085213  | 943419  | 768601   | 32713   |              |          |         |          |

| Quantified modified peptide sequence                      | Protein ID     | A_80oC | A_-20oC_120h | A_4oC_6h | A_RT_6h | A_RT_24h | B_-80oC | B_-20oC_120h | B_4oC_6h | B_RT_6h | B_RT_24h | C_-80oC | C_-20oC_120h | C_4oC_6h | C_RT_6h | C_RT_24h | D_-80oC | D_-20oC_120h | D_4oC_6h | D_RT_6h | D_RT_24h |
|-----------------------------------------------------------|----------------|--------|--------------|----------|---------|----------|---------|--------------|----------|---------|----------|---------|--------------|----------|---------|----------|---------|--------------|----------|---------|----------|
| [R].PVAEEVYGTROPR.[T]_                                    | P02788         |        |              |          |         |          |         |              |          | 17246   | 32940    |         |              |          |         |          |         |              |          |         |          |
| [R].QGVQVQVSTNSISLEGARGLIA.[E]_                           | P49327         |        |              |          |         |          |         |              |          |         | 49364    |         |              |          |         |          |         |              |          |         |          |
| [R].QPYAVSELAGHQTSAESWGTGR.[A]_                           | P36578         |        |              |          |         |          |         |              | 617356   |         | 48781    |         |              |          |         |          |         |              |          |         |          |
| [R].QRNLRKQTDKIDTR.[N]_                                   | P47710         |        |              |          |         |          |         |              |          |         | 35972    | 21878   | 59666        |          | 43319   | 35629    |         |              |          |         |          |
| [R].QWAGLVEKVQAAVGTSAAPVPSDNH.[-]_                        | P02649         |        |              |          |         | 19593    | 24730   | 18038        | 197953   | 88811   | 22522    |         |              |          |         |          |         |              |          |         |          |
| [R].QYLPNSHPPTVV.[R]_                                     | P07498         |        |              |          |         |          | 37425   | 40094        | 85224    | 43632   | 22522    |         |              |          |         |          |         |              |          |         |          |
| [R].QYLPNSHPPTVVR.[R]_                                    | P07498         |        |              |          |         |          | 121680  | 107195       | 116128   | 95977   | 88254    | 45145   | 86878        | 70137    | 37625   | 36258    |         |              |          |         |          |
| [R].RDFIDIESK.[F]_                                        | P06858         |        |              |          |         |          | 82551   | 93692        | 59816    | 58141   | 60280    | 268834  | 347279       | 383723   | 152711  | 111624   |         |              |          |         |          |
| [R].RFALEHASDLVEIYLWK.[L]_                                | Q6WVN34        |        |              |          |         |          |         |              |          |         | 50744    |         |              |          |         |          |         |              |          |         |          |
| [R].RLERCIKELTYQAEEDKKNLSRMQTMQMDK.[L]_                   | Q9Y2K3         |        |              |          |         |          |         |              |          |         | 42931    |         |              |          |         |          |         |              |          |         |          |
| [R].RPAIANNPYVPRT.[Y]_                                    | P07498         |        |              |          |         |          | 86353   | 75239        | 120746   |         |          |         |              |          |         |          |         |              |          |         |          |
| [R].RPAIANNPYVPRTYY.[A]_                                  | P07498         |        |              |          |         |          |         |              |          |         | 47472    | 117243  | 128743       | 144405   | 191013  | 185881   |         |              |          |         |          |
| [R].RPAIANNPYVPRTYYANP.[A]_                               | P07498         |        |              |          |         |          |         |              |          |         |          | 50946   | 86393        | 68706    | 106220  | 150675   |         |              |          |         |          |
| [R].RPDIQYPD.[A]_                                         | P10451         |        |              |          |         |          |         |              |          |         |          |         |              |          |         |          | 101115  |              |          |         |          |
| [R].RPDIQYPD.[T]_                                         | P10451         |        |              |          |         |          | 556598  | 756333       | 182161   | 332078  | 174028   |         |              |          |         |          |         |              |          |         |          |
| [R].RPDIQYPDATDE.[D]_                                     | P10451         |        |              |          |         |          | 478913  | 414931       | 149305   | 207722  | 134275   |         |              |          |         |          |         |              |          |         |          |
| [R].RPDIQYPDATDEDITSHM.[E]_                               | P10451         |        |              |          |         |          | 83480   | 80914        | 46841    | 65101   | 36524    | 28152   | 36144        | 29444    | 23917   | 17601    |         |              |          |         |          |
| [R].RPDIQYPDATDEDITSHME.[S]_                              | P10451         |        |              |          |         |          | 278031  | 331940       | 289575   | 216229  | 201594   |         |              |          |         |          |         |              |          |         |          |
| [R].RPDIQYPDATDEDITSHMESEELNGA.[Y]_                       | P10451         |        |              |          |         |          |         |              |          |         |          | 43591   | 37402        | 78716    | 30709   | 30824    |         |              |          |         |          |
| [R].RPDIQYPDATDEDITSHMESEELNGAYK.[A]_1xOxidation [M18]    | P10451         |        |              |          |         | 55931    | 129331  | 185661       | 265271   | 111115  | 107296   | 65048   | 52574        | 46233    | 28122   | 32214    |         |              |          |         |          |
| [R].RPNLHPSFIAPPK.[K]_                                    | P07498         |        |              |          |         | 27827    | 128691  | 157839       | 464432   | 116376  | 36777    |         |              |          |         |          |         |              |          |         |          |
| [R].RPSAAPASQQLQSLKSLTSVR.[F]_                            | Q9Y653         |        |              |          |         |          | 109210  | 109680       | 185121   | 122949  | 231610   |         |              |          |         |          |         |              |          |         |          |
| [R].RPSAPADGAPASGTSEPGRA.[R]_                             | O15232         |        |              |          |         | 17552    |         |              |          |         |          | 25221   |              | 23335    | 13644   |          |         |              |          |         |          |
| [R].SAWLDSGVTGSGLEGDH.[L]_                                | P12272         |        |              |          |         |          |         |              |          |         |          |         |              |          |         |          | 149528  | 223608       | 156037   | 73473   | 14585    |
| [R].SAWLDSGVTGSGLEGDHLS.[D]_                              | P12272         |        |              |          |         |          |         |              |          |         |          |         |              |          |         |          | 26011   | 48070        | 29366    |         |          |
| [R].SAWLDSGVTGSGLEGDHLSDTSTSLDLSR.[R]_                    | P12272         |        |              |          |         |          | 92437   | 108474       | 186218   | 120201  | 76240    | 68402   | 59482        | 60776    | 60924   |          | 57413   | 42498        | 42523    |         | 34323    |
| [R].SAWLDSGVTGSGLEGDHLSDTSTSLDLSRRH.[-]_                  | P12272         |        |              |          |         |          |         |              |          |         |          |         |              |          |         |          |         |              |          |         |          |
| [R].SDLYAVEMKKP.[-]_                                      | Q9NQR4         |        |              |          |         |          |         |              |          |         |          | 33932   | 52984        | 25710    | 22841   | 14978    |         |              |          |         |          |
| [R].SEETKENEFGTVTAEGK.[G]_                                | P01024         |        |              |          |         | 20378    |         |              |          |         |          |         |              |          |         |          |         |              |          |         |          |
| [R].SEETKENEFGTVTAEGKGQGTLSVVMTMYHA.[K]_                  | P01024         |        |              |          |         |          | 64206   | 55690        | 85062    | 66045   | 89343    |         |              |          |         |          |         |              |          |         |          |
| [R].SGKDPNHFRPAGLPEKY.[-]_                                | P0DJ18         |        | 62708        | 73443    |         | 48604    |         |              |          |         |          |         |              |          |         |          |         |              |          |         |          |
| [R].SIGVVEEKVS.[Q]_                                       | Q6UXA7         |        |              |          |         |          |         |              |          |         |          |         |              |          |         |          | 22316   | 36425        | 15587    |         |          |
| [R].SISDSDELASGFFVFPYPYFRPLPPIPFP.[R]_                    | Q8NFU4         |        |              |          |         |          |         |              |          |         |          |         |              |          |         |          | 32980   | 19362        | 63786    |         | 74662    |
| [R].SKSKFRRPDIQYPDATD.[E]_                                | P10451         |        |              |          |         |          | 46322   | 24548        |          | 57419   | 27015    |         |              |          |         |          |         |              |          |         |          |
| [R].SLAGPAGAAAPAGLGAAAAAPGALVRD.[V]_                      | Q8NES3         |        |              |          |         |          |         |              |          |         |          |         |              |          |         |          |         |              |          |         |          |
| [R].SLAGPAGAAAPAGLGAAAAAPGALVRDV.[H]_                     | Q8NES3         |        |              |          |         |          |         |              |          |         |          |         |              |          |         |          | 36511   | 30363        | 35814    | 36019   | 25873    |
| [R].SLYQSAGVAPESFEYIEAHGTGTVGDPQELNGIT.[R]_               | P49327         |        |              |          |         |          | 53806   | 58862        | 60535    | 46619   | 57628    |         |              |          |         |          | 19434   | 27365        |          |         | 25306    |
| [R].SNDLARVPLK.[L]_                                       | Q6UXA7         |        |              |          |         |          |         |              |          |         |          |         |              |          |         |          |         |              |          |         |          |
| [R].SPGLMSEDSNLHY.[A]_                                    | Q96A22         |        |              |          |         |          |         |              |          |         |          | 41022   | 69705        | 44569    | 43264   | 37944    |         |              |          |         |          |
| [R].SPRGWDQEPAREQAGGGWR.[A]_                              | Q86X29         |        |              |          |         |          |         |              |          |         |          |         |              |          |         |          |         |              |          |         |          |
| [R].SPEKVSAGNGG.[S]_                                      | P15941         |        |              |          |         |          | 29304   | 65791        | 27171    | 11649   | 7628     |         |              |          |         |          |         |              |          |         |          |
| [R].SSEHENAYENVPEEGKVRSTPM.[-]_                           | Q13113         |        |              |          |         |          |         |              |          |         |          |         |              |          |         |          |         |              |          |         |          |
| [R].SKKTHRIHWESASLR.[S]_                                  | P01024         |        | 168380       | 229475   |         | 111561   | 87923   | 58384        | 54793    | 194322  | 153011   |         |              |          |         |          |         |              |          |         |          |
| [R].SWTAADMAAQITK.[R]_                                    | P13746; P30443 |        |              |          |         |          |         | 101160       |          |         |          |         |              |          |         |          | 15472   | 19856        | 22908    |         | 10237    |
| [R].TAIRNGQVWEESLK.[R]_                                   | P22079         |        |              |          |         |          | 48910   | 60972        |          | 98556   | 108081   |         |              |          |         |          |         |              |          |         |          |
| [R].TAIRNGQVWEESLK.[L]_                                   | P22079         |        |              |          |         |          | 26263   | 49029        | 56301    | 27191   | 12579    |         |              |          |         |          |         |              |          |         |          |
| [R].TALGLKENNQEPHLHLSSATPVHS.[K]_                         | Q9NV23         |        |              |          |         |          | 43548   |              |          | 47669   |          |         |              |          |         |          |         |              |          |         |          |
| [R].TEGDGVYTLNDKKQWIN.[K]_                                | P00738         |        |              |          |         |          | 21312   | 22330        |          |         | 138519   |         |              |          |         |          |         |              |          |         |          |
| [R].TEGDGVYTLNDKKQWINK.[A]_                               | P00738         |        |              |          |         |          | 83666   | 71579        |          | 132414  | 230821   |         |              |          |         |          |         |              |          |         |          |
| [R].TGSSKIFPGNWDNHSK.[K]_                                 | Q08431         |        |              |          |         |          | 45441   | 51770        |          | 39883   | 42574    |         |              |          |         |          |         |              |          |         |          |
| [R].TPEAVQKLEQGLR.[H]_                                    | P49327         |        |              |          |         |          | 98283   | 85370        |          | 52344   | 72477    | 52959   |              | 56763    | 57177   | 53239    |         |              |          |         |          |
| [R].TRTAIRNGQVWEESLK.[R]_                                 | P22079         |        |              |          |         |          | 42350   | 61531        | 91322    | 132117  | 147154   |         |              |          |         |          |         |              |          |         |          |
| [R].TYANPAVVRPH.[A]_                                      | P07498         |        |              |          |         |          | 79827   | 95561        | 48169    | 12765   |          |         |              |          |         |          |         |              |          |         |          |
| [R].TYANPAVVRPHA.[Q]_                                     | P07498         |        |              |          |         |          |         |              |          |         |          | 99006   | 100825       | 42054    | 65716   | 81505    |         |              |          |         |          |
| [R].TYANPAVVRPHAQIPQRQY.[L]_                              | P07498         |        |              |          |         |          |         |              |          |         |          | 17670   | 28540        | 22225    | 31012   | 35220    |         |              |          |         |          |
| [R].TYANPAVVRPHAQIPQRQYLPNS.[H]_                          | P07498         |        |              |          |         |          | 121521  | 109911       | 98649    |         | 106485   | 482036  | 621662       | 410688   | 407507  | 397381   |         |              |          |         |          |
| [R].TYANPAVVRPHAQIPQRQYLPNSHPPTV.[V]_                     | P07498         |        |              |          |         |          |         |              |          |         |          | 123878  | 185510       | 153090   | 80366   | 107772   |         | 29750        | 20095    | 15914   |          |
| [R].TYANPAVVRPHAQIPQRQYLPNSHPPTVVR.[R]_                   | P07498         |        |              |          |         |          |         |              |          |         |          |         |              |          | 15135   | 39456    |         |              |          |         |          |
| [R].VETGVLKPGMVVTFAPVNVVTEVK.[S]_                         | P68104         |        |              |          |         |          |         |              |          |         |          | 46502   | 74330        |          | 85392   | 61925    |         |              |          |         |          |
| [R].VMPVLK.[S]_                                           | P05814         |        |              |          |         |          | 50875   |              |          |         |          |         |              |          |         |          |         |              |          |         |          |
| [R].VMPVLKSPT.[I]_                                        | P05814         |        |              |          |         |          | 1820663 | 1663931      | 560720   | 4188071 | 1416066  |         |              |          |         |          |         |              |          |         |          |
| [R].VMPVLKSPTIP.[F]_                                      | P05814         |        |              |          |         |          | 135183  | 130023       |          | 120639  | 91529    |         |              |          |         |          |         |              |          |         |          |
| [R].VMPVLKSPTIPF.[F]_                                     | P05814         |        |              |          |         |          | 372056  | 358908       | 129980   | 502226  | 704861   | 260297  | 406916       | 345444   | 463987  | 792555   |         |              |          |         |          |
| [R].VMPVLKSPTIPFFDPQIP.[K]_1xOxidation [M2]               | P05814         |        |              |          |         |          | 209872  | 230836       |          |         | 231402   |         |              |          |         |          |         |              |          |         |          |
| [R].VMPVLKSPTIPFFDPQIPKL.[T]_                             | P05814         |        |              |          |         | 84729    | 39007   | 184294       | 506063   | 39767   | 116141   | 57685   |              | 54220    | 51229   | 76691    |         |              |          |         |          |
| [R].VMPVLKSPTIPFFDPQIPKLT.[L]_                            | P05814         |        |              |          |         |          |         |              |          |         |          |         |              |          |         |          |         |              |          |         |          |
| [R].VMPVLKSPTIPFFDPQIPKLT.[L]_1xOxidation [M2]            | P05814         |        | 99440        | 191759   | 219928  | 322522   | 405402  | 422838       | 354150   | 509545  | 570492   | 98517   | 97289        | 141801   | 250804  | 1623908  |         |              |          |         | 86692    |
| [R].VMPVLKSPTIPFFDPQIPKLTDL.[E]_                          | P05814         |        |              |          |         | 163426   |         |              |          |         |          |         |              |          |         |          | 63777   |              |          |         | 265429   |
| [R].VMPVLKSPTIPFFDPQIPKLTDLLENL.[H]_                      | P05814         |        |              |          |         | 133780   |         |              |          |         |          |         | 116125       | 101128   | 68572   | 220136   |         |              |          |         |          |
| [R].VMPVLKSPTIPFFDPQIPKLTDLLENLHLPLP.[L]_1xOxidation [M2] | P05814         |        |              |          |         |          | 202989  | 204678       |          | 157652  | 156715   |         |              |          |         |          |         |              |          |         |          |
| [R].VVLNPLVSTYDLMSSAYLSTKDQYPYLK.[S]_                     | Q99541         |        |              |          |         |          | 99622   | 89578        | 359073   | 104227  | 132947   |         |              |          |         |          |         |              |          |         |          |
| [R].YEEIVKEVSTYIKK.[I]_                                   | P68104         |        |              |          |         |          |         |              |          |         |          | 95237   | 73653        | 94145    | 82810   | 80402    |         |              |          |         |          |
| [R].YPERLQ.[N]_                                           | P47710         |        |              |          |         |          | 359554  | 356627       | 69512    | 336828  | 184910   |         |              |          |         |          |         |              |          |         |          |
| [R].YPERLQNP.[S]_                                         | P47710         |        |              |          |         |          | 174692  | 193681       | 36256    | 147514  | 125207   | 68583   | 85828        | 52956    | 64733   | 42074    |         |              |          |         | 15943    |

[illegible]

| Quantified modified peptide sequence               | Protein ID | A_80oC | A_-20oC_120h | A_4oC_6h | A_RT_6h | A_RT_24h | B_-80oC | B_-20oC_120h | B_4oC_6h | B_RT_6h | B_RT_24h | C_-80oC | C_-20oC_120h | C_4oC_6h | C_RT_6h | C_RT_24h | D_-80oC | D_-20oC_120h | D_4oC_6h | D_RT_6h | D_RT_24h |
|----------------------------------------------------|------------|--------|--------------|----------|---------|----------|---------|--------------|----------|---------|----------|---------|--------------|----------|---------|----------|---------|--------------|----------|---------|----------|
| [S].GAQPLISKLEPQIA.[S]_                            | O60664     |        |              |          |         |          |         |              |          |         |          | 195412  | 209173       | 63809    | 135457  | 77713    | 129190  | 116502       | 109450   | 96811   | 29907    |
| [S].GAQPLISKLEPQIASAEY.[Y]_                        | O60664     |        |              |          |         |          |         |              |          |         |          | 126516  | 136507       | 132546   | 92053   | 52427    | 44104   | 48757        | 40728    | 28693   |          |
| [S].GAQPLISKLEPQIASASEY.[A]_                       | O60664     |        |              |          |         |          |         |              |          |         |          | 39711   | 43265        | 41411    | 31336   | 17628    |         |              |          |         |          |
| [S].GRITINGESPKHR.[S]_                             | Q8N7A1     |        |              |          |         |          |         |              |          |         |          | 285115  | 344205       | 329639   | 254703  | 140515   | 862872  | 687670       | 763657   | 924041  | 510584   |
| [S].GSSEEQGGSSRALV.[S]_                            | P01833     |        |              |          |         |          |         |              |          |         |          | 26555   | 28300        | 32519    | 41279   | 39669    | 168515  | 225499       | 216300   | 227416  | 70710    |
| [S].GSSEEQGGSSRALVST.[L]_                          | P01833     |        |              |          |         |          | 61001   | 74152        |          | 37856   | 40195    | 35463   | 48861        | 54108    | 61902   | 41712    |         |              |          |         |          |
| [S].GSSEEQGGSSRALVSTLVPL.[G]_                      | P01833     |        |              |          |         |          | 148186  | 135624       | 82629    | 156107  | 167220   |         |              |          |         |          |         |              |          |         |          |
| [S].GSSEEQGGSSRALVSTLVPLG.[L]_                     | P01833     |        |              |          |         |          | 479535  | 511087       | 390543   | 441008  | 467938   | 550188  | 598753       | 627478   | 577068  | 677033   | 350536  | 289055       | 266433   | 326273  | 193255   |
| [S].GVALSPWVIQK.[N]_                               | P19835     |        |              |          |         |          |         |              |          | 17909   | 88496    |         |              |          |         |          |         |              |          |         |          |
| [S].GVALSPWVIQKNPLF.[W]_                           | P19835     |        |              |          |         |          |         |              |          | 24607   | 117879   |         |              |          |         |          |         |              |          |         |          |
| [S].GVDKTKSVVTG.[G]_                               | O60664     |        |              |          |         |          |         |              |          |         |          | 19144   | 23489        | 31455    | 13808   | 10729    |         |              |          |         |          |
| [S].GVDKTKSVVTGGVQ.[S]_                            | O60664     |        |              |          |         |          |         |              |          |         |          | 92868   | 109389       | 96334    | 74602   |          |         |              |          |         |          |
| [S].GVENALTSELL.[V]_                               | Q99541     |        |              |          |         |          |         |              |          |         |          | 285776  | 288019       | 248507   | 170099  | 94753    | 27413   | 56053        | 57725    |         | 7594     |
| [S].GVENALTSELLVEQ.[Y]_                            | Q99541     |        |              |          |         |          |         |              |          |         |          | 193994  | 182879       | 173341   | 127847  | 88972    | 14463   | 12827        | 12857    | 22333   |          |
| [S].HEDMLVVDPK.[S]_                                | P10451     |        |              |          |         |          |         |              |          |         |          | 92392   | 79207        | 74326    | 61371   | 29394    |         |              |          |         |          |
| [S].HELDSASSEVN.[-]_                               | P10451     |        |              |          |         |          | 114185  | 171513       | 109859   | 180698  | 33978    | 175782  | 197988       | 235181   | 269245  | 116364   |         |              |          |         |          |
| [S].HMESEELNGAYK.[A]_                              | P10451     |        |              |          |         |          | 121352  | 86212        |          | 81125   | 15490    | 81740   | 73530        | 37101    | 95782   | 53554    |         |              |          |         |          |
| [S].HQNLIKFEALTNPKEK.[S]_                          | Q9H173     |        |              |          |         |          |         |              |          | 33301   | 26554    |         |              |          |         |          |         |              |          |         |          |
| [S].IPASSLPRLTPWIVAVAVI.[L]_                       | Q13410     |        |              |          |         |          |         |              |          |         |          | 108617  | 125995       | 123794   | 63832   | 44367    |         |              |          |         |          |
| [S].KEIPLSPMG.[E]_                                 | Q13410     |        |              |          |         |          |         |              |          |         |          | 22528   | 28206        | 23330    | 44637   | 29382    |         |              |          |         |          |
| [S].KEIPLSPMG.[D]_                                 | Q13410     |        |              |          |         |          |         |              |          |         |          | 34724   | 23776        |          | 67135   | 40083    |         |              |          |         |          |
| [S].KEIPLSPMGEDS.[A]_                              | Q13410     |        |              |          |         |          |         |              |          |         |          | 63335   | 75611        |          | 40206   | 27009    | 25528   | 25133        | 13535    |         |          |
| [S].KEIPLSPMGEDSAPR.[D]_                           | Q13410     |        |              |          | 39904   | 20175    |         |              |          |         |          | 218939  | 174007       |          | 148701  | 68354    | 101601  | 117445       | 43384    |         | 20236    |
| [S].KEIPLSPMGEDSAPRD.[A]_                          | Q13410     |        |              |          |         |          |         |              |          |         |          |         |              |          | 39689   |          |         |              |          |         |          |
| [S].KEIPLSPMGEDSAPRDADTLHSK.[L]_                   | Q13410     |        |              |          |         |          |         |              |          |         |          | 118437  | 138858       | 70883    | 104057  |          |         |              |          |         |          |
| [S].KEIPLSPMGEDSAPRDADTLHSKLIPTQ.[P]_              | Q13410     |        |              |          |         |          |         |              |          |         |          | 109485  | 127060       | 110621   | 59606   | 55056    |         |              |          |         |          |
| [S].KLQYKPV.[-]_                                   | P62333     |        |              |          |         |          |         |              |          |         |          | 29337   | 46251        | 25793    | 24768   | 14432    |         |              |          |         |          |
| [S].KLQPTQPSQ.[G]_                                 | Q13410     |        |              |          |         |          |         |              |          |         |          | 54928   | 54180        |          | 32664   |          |         |              |          |         |          |
| [S].LGSKINVKVGGNSKGLTK.[V]_                        | P0C0L4     |        |              |          |         |          |         |              |          |         |          |         | 27121        |          | 11605   | 12263    |         |              |          |         |          |
| [S].LPRLTPWIV.[A]_                                 | Q13410     |        |              |          |         |          |         |              |          |         |          |         |              |          |         |          |         |              |          |         |          |
| [S].LSSSEESITEYKQK.[V]_                            | P05814     |        |              |          |         |          | 91425   | 87363        |          | 56144   | 29719    |         |              |          |         |          |         |              |          |         |          |
| [S].LSSSEESITEYKQKVE.[K]_                          | P05814     |        |              |          |         |          |         |              |          | 101153  | 69688    | 94822   | 88089        | 83332    | 94981   | 66645    |         |              |          |         |          |
| [S].LSSSEESITEYKQKVEK.[V]_                         | P05814     |        |              |          |         | 98251    | 455178  | 513156       | 452791   | 591518  | 268520   | 45046   | 40694        | 39593    | 19857   |          |         |              |          |         |          |
| [S].MIGILVKGGVSAVAGGVAVGSAVVN.[K]_                 | Q8WUH6     |        |              |          |         |          |         |              |          |         |          | 229389  | 247870       | 166432   | 333482  | 253521   |         |              |          |         |          |
| [S].NEHSVIDSQELSKVSREF.[H]_                        | P10451     |        |              |          |         |          |         |              |          |         |          |         | 23290        | 27585    |         | 43502    |         |              |          |         |          |
| [S].NIQGVQPNIQDQAKHMGVM.[A]_                       | Q99541     |        |              |          |         |          |         |              |          |         |          | 20192   | 24819        | 24723    | 42468   | 22731    |         |              |          |         |          |
| [S].NIQGVQPNIQDQAKHMGVMA.[G]_                      | Q99541     |        |              |          |         |          |         |              |          |         |          | 72517   | 73318        | 74959    | 40098   | 15051    |         |              |          |         |          |
| [S].NPTAHENYEKNNVMLQ.[W]_                          | P47710     |        |              |          |         | 31121    |         |              |          |         |          | 168428  | 172833       | 194101   | 142076  | 71816    |         |              |          |         |          |
| [S].NPTAHENYEKNNVMLQW.[-]_1xOxidation [M14]        | P47710     |        |              |          |         |          | 61013   | 63951        |          | 46910   | 12405    |         |              |          |         |          |         |              |          |         |          |
| [S].PAVLVHRDGREQAEQMPFYR.[G]_                      | Q13410     |        |              |          |         |          | 36114   | 53451        |          | 100855  | 56245    |         |              |          |         |          |         |              |          |         |          |
| [S].PAVLVHRDGREQAEQMPFYRG.[R]_                     | Q13410     |        |              |          |         |          | 14785   |              | 40183    | 32442   | 22335    |         |              |          |         |          |         |              |          |         |          |
| [S].PMGEDSAPRDADTLHSK.[L]_                         | Q13410     |        |              |          |         |          |         |              |          |         |          | 87260   | 104336       | 83380    | 91857   | 30895    |         |              |          |         |          |
| [S].PMGEDSAPRDADTLHSKLIPTQ.[P]_                    | Q13410     |        |              |          |         |          |         |              |          |         |          | 73831   | 66681        | 61390    |         |          |         |              |          |         |          |
| [S].PTIPFFDPQIPKLTLDLENLHPLP.[L]_                  | P05814     |        |              |          | 84496   | 54173    | 1700406 | 1226184      | 1082870  | 1514312 | 2481281  | 252938  | 272607       | 368337   | 863957  | 1730435  |         |              | 95946    | 271895  |          |
| [S].PTIPFFDPQIPKLTLDLENLHPLP.[L]_                  | P05814     |        |              |          |         |          | 275180  | 312647       | 216262   | 335817  | 506345   | 359616  | 312295       | 400156   | 370432  | 421847   |         |              |          |         |          |
| [S].PTIPFFDPQIPKLTLDLENLHPLP.[L]_                  | P05814     |        |              |          |         |          |         |              |          |         |          | 20388   | 29693        | 20497    |         |          |         |              |          |         |          |
| [S].PTIPFFDPQIPKLTLDLENLHPLP.[Q]_                  | P05814     |        |              |          |         |          |         |              |          |         |          | 130480  | 85733        | 125150   | 192134  | 210794   |         |              |          |         |          |
| [S].PTIPFFDPQIPKLTLDLENLHPLP.[Q]_                  | P05814     |        |              |          |         |          |         |              |          |         |          |         |              |          |         |          |         |              |          |         | 112447   |
| [S].PTIPFFDPQIPKLTLDLENLHPLP.[Q]_                  | P05814     |        |              |          |         |          | 52960   | 89690        | 113493   | 92746   | 107377   | 178358  | 109536       | 214862   | 154662  | 89606    |         |              |          |         |          |
| [S].PTIPFFDPQIPKLTLDLENLHPLP.[Q]_                  | P05814     |        |              |          |         |          | 90225   | 43195        |          | 94177   | 200638   | 326460  | 207922       | 298762   | 348148  | 413866   |         |              |          |         | 69025    |
| [S].PTIPFFDPQIPKLTLDLENLHPLP.[Q]_                  | P05814     |        |              |          |         |          |         | 258680       | 208596   | 105380  | 36209    | 535348  |              | 284504   | 426116  | 174175   |         |              |          |         |          |
| [S].PTIPFFDPQIPKLTLDLENLHPLP.[Q]_1xOxidation [M30] | P05814     |        |              |          |         |          |         |              |          |         |          |         |              |          |         |          |         |              | 13037    |         | 20902    |
| [S].PTIPFFDPQIPKLTLDLENLHPLP.[Q]_                  | P05814     |        |              |          |         |          | 24339   | 28782        | 238122   | 72022   | 24039    | 56747   | 103049       | 20985    | 73739   | 43265    |         |              |          |         |          |
| [S].QLDDQSAETHSHKQS.[R]_                           | P10451     |        |              |          |         |          |         |              |          |         |          | 47301   |              |          |         | 25409    |         |              |          |         |          |
| [S].QLDDQSAETHSHKQSRLY.[K]_                        | P10451     |        |              |          |         |          |         |              |          |         |          | 155495  | 141713       | 91363    | 58763   | 116195   |         |              |          |         |          |
| [S].QNLGTNLPLQLGQPSSTGPSNSEHPQPALDPR.[S]_          | Q6UXA7     |        |              |          |         |          |         |              |          |         |          |         |              |          |         |          |         | 25240        | 23033    |         |          |
| [S].QPVSSSEMYRDPFGNPF.[-]_                         | P98082     |        |              |          |         |          | 69750   | 35864        |          |         |          |         |              |          |         |          |         |              |          |         |          |
| [S].RASVDGSGSEEQGGSSRALVST.[L]_                    | P01833     |        |              |          |         |          |         |              |          |         |          | 137835  | 118127       | 59678    | 37449   |          | 132535  | 204090       | 130292   | 62136   |          |
| [S].RASVDGSGSEEQGGSSRALVSTLVPL.[G]_                | P01833     |        |              |          |         |          |         |              |          |         |          |         |              |          |         |          | 114247  | 148076       | 120490   | 132357  | 103084   |
| [S].RASVDGSGSEEQGGSSRALVSTLVPLG.[L]_               | P01833     |        |              |          |         |          | 186391  | 192005       | 98703    |         |          | 2122711 | 2265786      | 1886875  | 1400687 | 359395   | 2586943 | 3406873      | 2625925  | 2783540 | 1588873  |
| [S].REEYMGMMNR.[Q]_                                | P47710     |        |              |          |         |          | 302077  | 260204       | 261520   | 488501  | 139494   | 265964  | 243620       | 148445   | 228540  | 183338   | 26929   | 39137        | 24732    |         |          |
| [S].REEYMGMMNRQR.[N]_                              | P47710     |        |              |          |         |          | 38629   | 40685        | 49801    |         |          |         |              |          |         |          |         |              |          |         |          |
| [S].REEYMGMMNRQNIL.[R]_                            | P47710     |        |              |          |         |          | 113900  | 82447        | 144513   | 231196  | 136263   |         |              |          |         |          |         |              |          |         |          |
| [S].SAKDTVATQL.[S]_                                | O60664     |        |              |          |         |          |         |              |          |         |          |         |              |          |         |          |         |              |          |         |          |
| [S].SAYLSTKQYPYLK.[S]_                             | Q99541     |        |              |          |         |          |         |              |          | 80000   | 30776    | 2901235 | 3210565      | 864607   | 2024792 | 1303481  | 362722  | 425740       | 399723   | 238789  | 95530    |
| [S].SEEQGGSSRALV.[S]_                              | P01833     |        |              |          |         |          |         |              |          |         |          |         |              |          |         |          | 28655   | 27141        | 29870    | 28860   | 11044    |
| [S].SEEQGGSSRALVSTLVPLG.[L]_                       | P01833     |        |              |          |         |          |         |              |          |         |          | 128313  | 127195       | 174300   | 202008  | 79043    | 71036   | 81421        | 67046    | 66085   | 34862    |
| [S].SEESITEYKQ.[K]_                                | P05814     |        |              |          |         |          | 46750   | 43687        |          | 44862   |          |         |              |          |         |          |         |              |          |         |          |
| [S].SEESITEYKQK.[V]_                               | P05814     |        |              |          |         |          | 57522   |              | 44593    | 45360   | 11022    | 103607  | 106889       | 108126   | 100557  | 92677    |         |              |          |         |          |
| [S].SEESITEYKQKVE.[E]_                             | P05814     |        |              |          |         |          | 71130   | 80739        |          | 66627   | 32584    | 479003  | 464663       | 605564   | 545270  | 369006   |         | 25556        | 17100    |         | 46041    |
| [S].SEESITEYKQKVE.[K]_                             | P05814     |        |              |          |         |          | 36562   | 78562        |          | 84633   | 18679    |         |              |          |         |          |         |              |          |         |          |
| [S].SEPIPLESRE.[E]_                                | P47710     |        |              |          |         |          | 50252   | 53166        |          | 42601   | 24630    |         |              |          | 23271   | 29616    | 15390   |              |          |         |          |
| [S].SEPIPLESREEY.[M]_                              | P47710     |        |              |          |         |          | 102298  | 79980        |          | 86316   | 44954    |         |              |          |         |          |         |              |          |         |          |
| [S].SEPIPLESREEYMGMMN.[R]_                         | P47710     |        |              |          |         |          | 309444  | 289540       | 217991   | 253035  | 411312   | 75952   | 54120        | 146605   | 90831   | 102159   |         |              |          |         | 16289    |

| Quantified modified peptide sequence                       | Protein ID | A_80oC | A_-20oC_120h | A_4oC_6h | A_RT_6h | A_RT_24h | B_-80oC | B_-20oC_120h | B_4oC_6h | B_RT_6h | B_RT_24h | C_-80oC | C_-20oC_120h | C_4oC_6h | C_RT_6h | C_RT_24h | D_-80oC | D_-20oC_120h | D_4oC_6h | D_RT_6h | D_RT_24h |
|------------------------------------------------------------|------------|--------|--------------|----------|---------|----------|---------|--------------|----------|---------|----------|---------|--------------|----------|---------|----------|---------|--------------|----------|---------|----------|
| [S].SEPIPLESREEYMGMMNR.[Q]_                                | P47710     |        |              |          |         |          | 291629  | 206166       | 486341   | 416111  | 188104   | 148624  | 148664       | 139522   | 145099  | 131965   | 18997   | 21049        | 17437    | 57377   | 14566    |
| [S].SGVENALT.K.[S]_                                        | Q99541     |        |              |          |         |          |         |              |          |         |          | 323483  | 423685       | 119223   | 290391  | 151433   | 46578   | 21118        |          |         |          |
| [S].SGVENALT.KSE.[L]_                                      | Q99541     |        |              |          |         |          |         |              |          |         |          | 35026   | 37807        | 31556    | 37732   |          |         |              |          |         |          |
| [S].SGVENALT.KSELLVEQYLPLTE.[E]_                           | Q99541     |        |              |          |         |          |         |              |          |         |          | 62035   |              | 50102    | 45069   |          |         |              |          |         |          |
| [S].SKVSGAQEMVSSAKDVTATQL.[S]_                             | O60664     |        |              |          |         |          |         |              |          |         |          | 66586   | 94121        | 62973    |         | 37270    |         | 20040        | 19323    |         |          |
| [S].SPPASPLQLHLPGKAVDLG.[P]_                               | Q96TA1     |        |              |          |         |          |         |              |          |         |          | 33077   | 22485        | 20238    |         |          |         |              |          |         |          |
| [S].SSEESITEYKQ.[K]_                                       | P05814     |        |              |          |         |          |         |              |          |         |          | 31177   | 143718       |          | 30009   | 20601    |         |              |          |         |          |
| [S].SSEESITEYKQK.[V]_                                      | P05814     |        |              |          |         |          |         |              |          |         |          | 62714   | 69619        | 71601    | 89447   | 62904    |         |              |          |         |          |
| [S].SSEESITEYKQKV.[E]_                                     | P05814     |        |              |          |         |          |         |              |          | 32056   |          | 183379  | 149465       | 143603   | 180030  | 177946   |         |              |          |         |          |
| [S].SSEESITEYKQKVE.[K]_                                    | P05814     |        |              |          |         |          |         |              |          |         |          | 24731   | 24816        | 20594    | 26443   | 23181    |         |              |          |         |          |
| [S].SSYSKQFTSSTSYN.[R]_                                    | P02671     |        |              |          |         |          |         |              |          |         |          |         |              |          |         |          | 44986   | 43514        | 101111   |         |          |
| [S].STYDLMSSAYLSTKDQQ.[Y]_                                 | Q99541     |        |              |          |         |          |         |              |          |         |          | 35596   | 21963        |          | 26296   |          |         |              |          |         |          |
| [S].STYDLMSSAYLSTKDQYPYLK.[S]_1xOxidation [M6]             | Q99541     |        |              |          |         |          |         |              |          |         |          | 94376   | 142062       | 130156   | 101945  | 55018    |         |              |          |         |          |
| [S].SYSKQFTSSTSYN.[R]_                                     | P02671     |        |              |          |         |          |         |              |          |         |          |         |              |          |         |          | 31134   | 29895        | 64256    |         |          |
| [S].TDRSPYEKVS.[A]_                                        | P15941     |        |              |          |         |          |         |              |          |         |          | 49044   | 67652        | 25616    | 43958   | 14519    |         |              |          |         |          |
| [S].TDRSPYEKVSAGNGGSSLSYTNPAVA.[A]_                        | P15941     |        |              |          |         |          |         |              |          |         |          |         |              |          |         |          | 33006   | 34617        | 32947    |         |          |
| [S].TKDQYPYLK.[S]_                                         | Q99541     |        | 70878        | 30790    |         | 35183    | 27862   | 29065        |          | 58831   | 18687    | 595217  | 689011       | 476907   | 498956  | 205505   | 18962   | 43289        | 42824    | 22213   | 9553     |
| [S].TPAPEARPVIG.[A]_                                       | Q96AD5     |        |              |          |         |          |         |              |          |         |          | 34361   | 39965        | 37169    | 43192   | 22820    |         |              |          |         |          |
| [S].TPAPEARPVIGA.[L]_                                      | Q96AD5     |        |              |          |         |          |         |              |          |         |          | 15289   |              | 29951    |         |          |         |              |          |         |          |
| [S].TPAPEARPVIGAL.[G]_                                     | Q96AD5     |        |              |          |         |          |         |              |          |         |          | 34088   | 19233        | 12158    | 24877   | 15268    |         |              |          |         |          |
| [S].TSYNRGDSTFEKSY.[K]_                                    | P02671     |        |              |          |         |          |         |              |          |         |          |         |              |          |         |          |         |              |          |         |          |
| [S].TTVKIVLK.[E]_                                          | Q6WVN34    |        | 37354        |          |         |          | 133972  | 114525       |          | 154124  | 153638   |         |              |          |         |          |         |              |          |         |          |
| [S].TVHLIEFARKN.[V]_                                       | Q99541     |        |              | 38121    |         | 23698    |         |              |          |         |          |         |              |          |         |          |         |              |          |         |          |
| [S].VDSGSSEFGGSSRA.[L]_                                    | P01833     |        |              |          | 137723  | 31460    |         |              |          |         |          |         |              |          |         |          | 32849   | 25608        | 28737    |         | 13440    |
| [S].VPQPKVL.[P]_                                           | P05814     |        |              |          |         |          |         |              |          |         |          |         |              |          |         |          |         |              |          |         |          |
| [S].VPQPKVLPIPQQVVPYQRAV.[P]_                              | P05814     |        |              |          |         |          | 175592  | 115170       | 948462   | 99883   | 52329    | 118845  | 137693       | 131727   | 178466  | 137083   |         |              |          |         |          |
| [S].VPQPKVLPIPQQVVPYQRAVVPQAL.[L]_                         | P05814     |        |              |          |         |          |         |              |          |         |          | 50074   | 78533        | 59375    | 142094  | 191544   |         |              |          |         |          |
| [S].YETSQLDDQSAETHS.[H]_                                   | P10451     |        |              |          |         |          |         |              |          |         |          |         |              |          |         |          |         |              |          |         |          |
| [S].YETSQLDDQSAETHSH.[K]_                                  | P10451     |        |              |          |         |          |         |              |          |         |          |         |              |          |         |          |         |              |          |         |          |
| [S].YETSQLDDQSAETHSHK.[Q]_                                 | P10451     |        |              |          |         |          |         |              |          |         |          |         |              |          |         |          |         |              |          |         |          |
| [S].YETSQLDDQSAETHSHKQ.[S]_                                | P10451     |        |              |          |         |          |         |              |          |         |          |         |              |          |         |          |         |              |          |         |          |
| [S].YETSQLDDQSAETHSHKQS.[R]_                               | P10451     |        |              |          |         |          |         |              |          |         |          |         |              |          |         |          |         |              |          |         |          |
| [S].YETSQLDDQSAETHSHKQSR.[L]_                              | P10451     |        |              |          |         |          |         |              |          |         |          |         |              |          |         |          |         |              |          |         |          |
| [S].YETSQLDDQSAETHSHKQSRLY.[K]_                            | P10451     |        |              |          |         |          |         |              |          |         |          |         |              |          |         |          |         |              |          |         |          |
| [S].YPPPPAGHSGPGAGFPVPNQPVY.[N]_                           | O15162     |        |              |          |         |          |         |              |          |         |          |         |              |          |         |          |         |              |          |         |          |
| [S].YPPYGTNLQRRPAIAINNP.[Y]_                               | P07498     |        |              |          |         |          |         |              |          |         |          |         |              |          |         |          |         |              |          |         |          |
| [S].YSKQFTSSTSYNRGDSTFEKSY.[K]_                            | P02671     |        |              |          |         | 27438    |         |              |          |         |          | 88851   | 120343       | 109627   | 49207   | 22714    |         |              |          |         |          |
| [S].YTNPAAVATSANL.[-].                                     | P15941     |        |              |          |         |          |         |              |          |         |          |         |              |          |         |          |         |              |          |         |          |
| [T].AAAVSGAQPILSKLEPOIA.[S]_                               | O60664     |        |              |          |         |          |         |              |          |         |          |         |              |          |         |          |         |              |          |         |          |
| [T].APYVPVMPYVPNSYPYGTNLQYR.[R]_                           | P07498     |        |              |          |         |          |         |              |          |         |          |         |              |          |         |          |         |              |          |         |          |
| [T].APYVPVMPYVPNSYPYGTNLQYRRP.[A]_                         | P07498     |        |              |          |         |          |         |              |          |         |          |         |              |          |         |          |         |              |          |         |          |
| [T].DEDITSHME.[S]_                                         | P10451     |        |              |          |         |          | 85257   | 63829        |          | 57105   | 29291    |         |              |          |         |          |         |              |          |         |          |
| [T].DEDITSHMESEELNGAY.[K]_                                 | P10451     |        |              |          |         |          | 125598  | 149398       | 131679   | 224270  | 307534   |         |              |          |         |          |         |              |          |         |          |
| [T].DLENLHL.[P]_                                           | P05814     |        |              |          |         |          | 141998  | 100553       |          | 86102   | 98224    |         |              |          |         |          |         |              |          |         |          |
| [T].DLENLHLP.[L]_                                          | P05814     |        |              |          |         |          | 137060  | 159760       | 162793   | 219205  | 714122   |         |              |          |         |          |         |              |          |         |          |
| [T].DLENLHLP.[P]_                                          | P05814     |        |              |          |         |          | 140108  | 157030       |          | 112964  | 210113   |         |              |          |         |          |         |              |          |         |          |
| [T].DLENLHLP.L.[L]_                                        | P05814     |        |              |          |         |          | 149608  | 182348       |          | 55441   | 82891    |         |              |          |         |          |         |              |          |         |          |
| [T].DLENLHLP.L.L.[Q]_                                      | P05814     |        |              |          | 60930   | 429665   | 629901  | 564194       | 353456   | 677374  | 1783595  | 219536  | 203981       | 330606   | 376602  | 369341   |         |              |          |         |          |
| [T].DLENLHLP.L.L.Q.P.[L]_                                  | P05814     |        | 129562       | 113412   |         | 438059   | 368584  | 409972       | 276216   | 563876  | 1391620  | 173511  | 194930       | 193295   | 173307  | 164068   |         |              |          |         |          |
| [T].DLENLHLP.L.L.Q.P.L.[M]_                                | P05814     |        |              |          |         | 191264   | 728004  | 735353       | 349979   | 684784  | 806455   | 337598  | 283470       | 349463   | 468401  | 466801   |         | 18745        |          |         |          |
| [T].DLENLHLP.L.L.Q.P.L.M.[Q]_1xOxidation [M16]             | P05814     |        | 35799        |          |         | 54383    | 89155   | 93831        |          | 105753  | 234899   | 56013   | 77883        | 63188    | 111794  | 229623   |         |              |          |         |          |
| [T].DLENLHLP.L.L.Q.P.L.M.Q.[Q]_1xOxidation [M16]           | P05814     |        |              |          |         |          | 144481  |              |          | 73503   |          | 162067  | 177070       | 228070   | 176187  | 180541   |         |              |          |         | 84450    |
| [T].DLENLHLP.L.L.Q.P.L.M.Q.Q.[V]_                          | P05814     |        |              |          |         |          | 51486   | 33934        | 60253    | 50066   | 53485    | 18091   |              | 16915    | 17350   | 34924    |         |              |          |         | 29366    |
| [T].DLENLHLP.L.L.Q.P.L.M.Q.Q.VPQIPQT.[L]_                  | P05814     |        |              |          |         |          | 4040160 | 3464946      | 1317525  | 1423688 | 868714   | 6366328 | 5185541      | 6736990  | 4984433 | 2985218  |         |              |          |         |          |
| [T].DLENLHLP.L.L.Q.P.L.M.Q.Q.VPQIPQT.[L]_1xOxidation [M16] | P05814     |        |              |          |         |          |         |              |          |         |          |         |              |          |         |          |         |              |          |         |          |
| [T].DLENLHLP.L.L.Q.P.L.M.Q.Q.VPQIPQTL.[A]_                 | P05814     |        |              |          |         |          |         |              |          |         |          |         |              |          |         |          |         |              |          |         |          |
| [T].DLENLHLP.L.L.Q.P.L.M.Q.Q.VPQIPQTLA.[L]_                | P05814     |        |              |          |         |          |         |              |          |         |          |         |              |          |         |          |         |              |          |         |          |
| [T].DLENLHLP.L.L.Q.P.L.M.Q.Q.VPQIPQTLAL.[P]_               | P05814     |        |              |          |         |          |         |              |          |         |          |         |              |          |         |          |         |              |          |         |          |
| [T].DVLFLVPTAIALAQHRANA.[K]_                               | P19835     |        |              |          |         |          | 50431   | 23219        |          |         |          |         |              |          |         |          |         |              |          |         |          |
| [T].EEDFYKLVSEFTITKGL.[R]_                                 | P19835     |        |              |          |         |          |         |              |          |         |          |         |              |          |         |          |         |              |          |         |          |
| [T].EEDFYKLVSEFTITKGLR.[G]_                                | P19835     |        |              |          |         | 114166   | 124088  | 120508       |          | 373122  | 644644   |         |              |          |         |          |         |              |          |         |          |
| [T].EEDFYKLVSEFTITKGLRGA.[K]_                              | P19835     |        |              |          |         | 28761    | 61985   | 56965        | 50431    | 150023  | 161818   |         |              |          |         |          |         |              |          |         |          |
| [T].EEEELEKAKVEGFDLV.[Q]_                                  | Q99541     |        |              |          |         |          |         |              |          |         |          | 337345  | 315880       | 304154   | 241189  | 153353   |         |              |          |         |          |
| [T].EGDGVYTLNDKKQWIN.[K]_                                  | P00738     |        |              |          |         |          |         | 18232        |          | 24004   | 47701    |         |              |          |         |          |         |              |          |         |          |
| [T].EGDGVYTLNDKKQWINK.[A]_                                 | P00738     |        |              |          |         |          | 105430  | 134077       | 95381    | 69640   | 34343    |         |              |          |         |          |         |              |          |         |          |
| [T].EGGFVEGVNKKL.[G]_                                      | P19835     |        |              |          |         |          | 103139  | 75859        |          | 65197   | 32735    |         |              |          |         |          |         |              |          |         |          |
| [T].EGGFVEGVNKKLGLL.G.[D]_                                 | P19835     |        |              |          |         |          | 129434  | 133924       |          | 62064   | 68665    |         |              |          |         |          |         |              |          |         |          |
| [T].EGGFVEGVNKKLGLLGD.[S]_                                 | P19835     |        |              |          |         |          | 61485   | 38325        |          | 23172   | 11318    |         |              |          |         |          |         |              |          |         |          |
| [T].EGGFVEGVNKKLGLLGDSDIF.[K]_                             | P19835     |        |              |          |         |          | 1256405 | 1233586      | 1102129  | 845218  | 366927   |         |              |          |         |          |         |              |          |         |          |
| [T].EGGFVEGVNKKLGLLGDSDIFK.[G]_                            | P19835     |        |              |          |         |          | 214110  | 270091       | 200819   | 282609  | 102406   |         |              |          |         |          |         |              |          |         |          |
| [T].ENSGYLEITKK.[M]_                                       | P19835     |        |              |          |         | 28488    |         | 38705        |          | 50421   | 54228    | 34347   | 44168        | 22682    | 30593   | 24755    |         |              |          |         |          |
| [T].ESWAQDPSQENK.[K]_                                      | P19835     |        |              |          |         |          | 30344   | 36027        |          | 26368   | 25591    |         |              |          |         |          |         |              |          |         |          |
| [T].FDVYTESWAQDPSQENK.[K]_                                 | P19835     |        |              |          |         |          | 36522   |              |          | 115022  | 130617   |         |              |          |         |          |         |              |          |         |          |
| [T].GAKDAVTITVT.[G]_                                       | Q99541     |        |              |          |         |          |         |              |          |         |          | 62909   | 63633        | 16003    | 62946   | 41043    |         |              |          |         |          |

| Quantified modified peptide sequence                     | Protein ID                             | A_80oC | A_-20oC_120h | A_4oC_6h | A_RT_6h | A_RT_24h | B_-80oC  | B_-20oC_120h | B_4oC_6h | B_RT_6h  | B_RT_24h | C_-80oC  | C_-20oC_120h | C_4oC_6h | C_RT_6h  | C_RT_24h | D_-80oC  | D_-20oC_120h | D_4oC_6h | D_RT_6h  | D_RT_24h |
|----------------------------------------------------------|----------------------------------------|--------|--------------|----------|---------|----------|----------|--------------|----------|----------|----------|----------|--------------|----------|----------|----------|----------|--------------|----------|----------|----------|
| [T].GAKDAVTTTGTGAKDSVA.[S]_                              | Q99541                                 |        |              |          |         |          |          |              |          |          |          | 36257    | 60906        | 39887    | 33241    | 27528    |          |              |          |          |          |
| [T].GAKDAVTTTGTGAKDSVASTITGVMD.[K]_                      | Q99541                                 |        |              |          |         |          |          |              |          |          |          | 153365   | 142408       | 100197   | 100221   | 48977    |          |              |          |          |          |
| [T].GAKDSVASTITGVMD.[K]_                                 | Q99541                                 |        |              |          |         |          |          |              |          |          |          | 201693   | 233226       | 81715    | 183590   | 92730    | 75777    | 98711        | 73064    | 33201    | 15431    |
| [T].GAKDSVASTITGVMDKTKGAVTG.[S]_                         | Q99541                                 |        |              |          |         |          |          |              |          |          |          | 198602   | 213370       | 161861   | 136390   | 81898    |          |              |          |          |          |
| [T].GSGLEGDHLSDTSTTSLELDSRRH.[-]_                        | P12272                                 |        |              |          |         |          | 26736    | 32419        |          | 35268    | 23115    |          |              |          |          |          |          |              |          |          |          |
| [T].HQIYPTQPLAPVH.[N]_                                   | P05814                                 |        |              |          |         |          |          |              |          |          |          |          |              |          |          |          |          |              |          |          |          |
| [T].HQIYPTQPLAPVHN.[P]_                                  | P05814                                 |        |              |          |         |          |          |              |          |          |          |          |              |          |          |          |          |              |          |          |          |
| [T].HRIHWESASLLR.[S]_                                    | P01024                                 |        | 48061        | 80997    |         | 14282    | 25796    | 19322        |          | 20703    | 25933    |          |              |          |          |          |          |              |          |          |          |
| [T].IESLSSESSEITEYKQKV.[E]_                              | P05814                                 |        |              |          |         |          |          |              |          |          |          |          |              |          |          |          |          |              |          |          |          |
| [T].IESLSSESSEITEYKQKVE.[K]_                             | P05814                                 |        |              |          |         |          | 56840    | 57570        |          | 46119    | 30173    | 39287    | 22351        | 33781    | 66454    | 87350    |          |              |          |          |          |
| [T].IPFFDPQIPKL.[T]_                                     | P05814                                 |        |              |          |         | 156894   | 1109939  | 868656       |          | 557640   | 977700   | 329806   | 354572       | 366318   | 1008556  | 2378575  |          |              |          |          | 50061    |
| [T].IPFFDPQIPKLT.D.[L]_                                  | P05814                                 |        |              |          |         | 95877    | 835659   | 692835       |          | 483116   | 810071   | 145259   | 133541       | 151459   | 386557   | 1150698  |          |              |          |          |          |
| [T].IPFFDPQIPKLTDL.[E]_                                  | P05814                                 |        |              |          |         |          | 61155    | 46743        | 211859   | 89519    | 126274   |          |              |          |          |          |          |              |          |          |          |
| [T].IPFFDPQIPKLTDL.E.[N]_                                | P05814                                 |        |              |          |         |          |          |              |          |          |          | 71695    |              | 128832   | 77485    | 191493   |          |              |          |          |          |
| [T].IPFFDPQIPKLTDL.N.[L]_                                | P05814                                 |        |              |          |         |          |          |              |          |          |          |          |              |          |          |          |          |              |          |          |          |
| [T].IPFFDPQIPKLTDL.NLH.[L]_                              | P05814                                 |        |              |          |         |          |          | 179712       | 277670   |          |          |          |              |          |          |          |          |              |          |          |          |
| [T].IPFFDPQIPKLTDL.NLH.L.[P]_                            | P05814                                 |        |              |          |         |          |          |              |          |          |          |          |              |          |          |          |          |              |          |          |          |
| [T].IPFFDPQIPKLTDL.NLH.LPL.[P]_                          | P05814                                 |        |              |          |         |          |          |              |          |          |          |          |              |          |          |          |          |              |          |          |          |
| [T].IPFFDPQIPKLTDL.NLH.LPL.L.[L]_                        | P05814                                 |        |              |          |         |          |          |              |          |          |          |          |              |          |          |          |          |              |          |          |          |
| [T].IPFFDPQIPKLTDL.NLH.LPL.L.[Q]_                        | P05814                                 |        |              |          |         |          |          |              |          |          |          |          |              |          |          |          |          |              |          |          |          |
| [T].IPFFDPQIPKLTDL.NLH.LPL.LQ.[P]_                       | P05814                                 |        |              |          |         |          |          |              |          |          |          |          |              |          |          |          |          |              |          |          |          |
| [T].IPFFDPQIPKLTDL.NLH.LPL.LLQ.P.[L]_                    | P05814                                 |        |              |          |         |          | 141509   | 83167        |          |          | 58109    | 125216   | 129514       | 138970   | 111988   | 97817    |          |              |          |          |          |
| [T].IPFFDPQIPKLTDL.NLH.LPL.LLQPL.[M]_                    | P05814                                 |        |              |          |         |          | 314674   | 293776       | 280241   | 202584   | 148495   | 357481   | 270617       | 357337   | 300568   | 205163   |          |              |          |          |          |
| [T].IPFFDPQIPKLTDL.NLH.LPL.LLQPLM.[Q]_                   | P05814                                 |        |              |          |         |          |          |              |          |          |          |          |              |          |          |          |          |              |          |          |          |
| [T].IPFFDPQIPKLTDL.NLH.LPL.LLQPLM.[Q]_ 1xOxidation [M28] | P05814                                 |        |              |          |         |          |          |              |          |          |          |          |              |          |          |          |          |              |          |          |          |
| [T].IPFFDPQIPKLTDL.NLH.LPL.LLQPLMQ.[Q]_                  | P05814                                 |        |              |          |         |          |          |              |          |          |          |          |              |          |          |          |          |              |          |          |          |
| [T].ITGVMDKTKGAVTG.[S]_                                  | Q99541                                 |        |              |          |         |          |          |              |          |          |          |          |              |          |          |          |          |              |          |          |          |
| [T].KALENPQPHPGWQGT.LK.[A]_                              | P19835                                 |        |              |          |         |          | 31965    | 37056        |          | 50836    | 28001    |          |              |          |          |          |          |              |          |          |          |
| [T].KDQYPY.LK.[S]_                                       | Q99541                                 |        |              |          |         |          |          |              |          |          |          |          |              |          |          |          |          |              |          |          |          |
| [T].LALPPQPLWSVPQP.[K]_                                  | P05814                                 |        |              |          |         |          |          |              |          | 56374    | 90941    |          |              |          |          |          |          |              |          |          |          |
| [T].LALPPQPLWSVPQPKV.[L]_                                | P05814                                 |        |              |          |         |          |          |              |          |          |          | 54969    | 69294        | 85451    | 122671   | 149805   |          |              |          |          |          |
| [T].LALPPQPLWSVPQPKVLP.P.[Q]_                            | P05814                                 |        |              |          |         |          |          |              |          |          |          |          |              |          |          |          |          |              |          |          |          |
| [T].LALPPQPLWSVPQPKVLP.PQ.[V]_                           | P05814                                 |        |              |          |         |          |          |              |          |          |          |          |              |          |          |          |          |              |          |          |          |
| [T].LALPPQPLWSVPQPKVLP.PQ.VVPY.PQ.[R]_                   | P05814                                 |        |              |          |         |          |          |              |          |          |          |          |              |          |          |          |          |              |          |          |          |
| [T].LALPPQPLWSVPQPKVLP.PQ.VVPY.PQRAV.[P]_                | P05814                                 |        |              | 20675    |         | 582124   |          |              |          |          |          |          |              |          |          |          |          |              |          |          |          |
| [T].LALPPQPLWSVPQPKVLP.PQ.VVPY.PQRAV.PQ.[A]_             | P05814                                 |        |              |          |         |          |          |              |          |          |          |          |              |          |          |          |          |              |          |          |          |
| [T].LDPDTAHPHLF.[L]_                                     | Q13410                                 |        |              |          |         |          |          |              |          |          |          |          |              |          | 214139   | 1591359  |          |              |          |          |          |
| [T].LPTKETIEQ.[E]_                                       | P63313                                 |        |              |          |         |          | 39890    | 40888        |          |          |          |          |              |          |          |          |          |              |          |          |          |
| [T].LPTKETIEQ.E.[K]_                                     | P63313                                 |        |              |          |         |          |          |              |          |          |          |          |              |          |          |          |          |              |          |          |          |
| [T].LPTKETIEQ.EKRSEIS.[-]_                               | P63313                                 |        |              |          |         |          | 95891    | 82661        | 89215    | 36421    |          |          |              |          |          |          |          |              |          |          |          |
| [T].LVQDGI.AK.[G]_                                       | Q13410                                 |        |              |          |         |          |          |              |          |          |          |          |              |          |          |          |          |              |          |          |          |
| [T].LVQDGI.AKGRVA.[L]_                                   | Q13410                                 |        |              |          |         |          |          |              |          |          |          |          |              |          |          |          |          |              |          |          |          |
| [T].NEERKTLNLEEAK.[K]_                                   | P10909                                 |        |              |          |         |          | 79579    | 86164        |          | 96566    | 15817    |          |              |          |          |          |          |              |          |          |          |
| [T].NLVQRPAIAINNPVY.PRT.[Y]_                             | P07498                                 |        |              |          |         |          |          |              |          |          |          |          |              |          |          |          |          |              |          |          |          |
| [T].QPLAPVHNPI.SV.[-]_                                   | P05814                                 |        |              |          |         |          | 39245673 | 39018754     | 37145317 | 32797775 | 34259593 | 25865358 | 28299988     | 25071740 | 34160609 | 51296523 | 11903838 | 10213606     | 10623810 | 19385005 | 22311665 |
| [T].SALPIIQLEPQIAVANTY.[A]_                              | Q99541                                 |        |              |          |         |          |          |              |          |          |          | 121076   | 104998       | 128158   | 94217    | 86874    |          |              |          |          |          |
| [T].SEVSPNSKPS.PNT.[K]_                                  | P12272                                 |        |              |          |         |          |          |              |          |          |          |          |              |          |          |          |          |              |          |          |          |
| [T].SQQPASEDTLTYADLDMVHLN.[R]_                           | P78324                                 |        |              |          | 163811  | 42621    | 15226    | 18481        |          | 78527    | 92518    |          |              |          |          |          |          |              |          |          |          |
| [T].SPVDDFRQPRYSGGNF.[E]_                                | Q16625                                 |        |              |          |         |          |          |              |          |          |          |          |              |          |          |          |          |              |          |          |          |
| [T].SQLDDQSAETHSHKQS.[R]_                                | P10451                                 |        |              |          |         |          |          |              |          |          |          | 54493    | 57648        |          | 43165    | 39909    |          |              |          |          |          |
| [T].SQLDDQSAETHSHKQSRLY.[K]_                             | P10451                                 |        |              |          |         |          |          |              |          |          |          | 17191    | 14973        | 15490    | 15507    | 13956    |          |              |          |          |          |
| [T].TFDVYTESWAQDPSQENKKK.[T]_                            | P19835                                 |        |              |          |         |          | 139429   | 190658       | 266049   | 140070   | 179426   | 204303   | 281830       | 183167   | 318916   | 189624   |          |              |          |          |          |
| [T].VPSMGIGLVKGGVSAGVGGTVAVG.[S]_                        | Q8WUH6                                 |        |              |          |         |          |          |              |          |          |          | 48915    | 28127        | 42209    | 24281    |          |          |              |          |          |          |
| [T].VPVGRVETGVLPKGMVVT.[F]_                              | P68104                                 |        |              |          |         |          |          |              |          |          |          | 43463    | 44515        | 36686    | 28369    | 29995    |          |              |          |          |          |
| [T].VVDFTDVLFLVPTEIALAQH.[R]_                            | P19835                                 |        |              |          |         |          | 182718   | 165629       | 146686   | 164322   | 288315   |          |              |          |          |          |          |              |          |          |          |
| [T].VVDFTDVLFLVPTEIALAQHR.[A]_                           | P19835                                 |        | 82219        |          |         | 67929    | 527184   | 435605       | 496217   | 389229   | 507692   | 78914    | 96739        |          |          |          |          |              |          |          |          |
| [T].VVDFTDVLFLVPTEIALAQHRAN.[A]_                         | P19835                                 |        |              |          |         |          |          |              |          |          |          |          |              |          |          |          |          |              |          |          |          |
| [T].YYANPAVVRPHAQIPQR.[Q]_                               | P07498                                 |        |              |          |         |          |          |              |          |          |          |          |              |          |          |          |          |              |          |          |          |
| [V].ADTRDQADGSR.[A]_                                     | P01833                                 |        |              |          |         |          | 500784   | 503887       | 1099737  | 473505   | 377629   | 36383    | 41437        | 61143    | 43838    | 50504    | 218137   | 312563       | 234457   | 37365    | 104179   |
| [V].ADTRDQADGSRASVD.[S]_                                 | P01833                                 |        |              |          |         |          | 179128   | 187643       | 107958   | 125604   | 24349    |          |              |          |          |          |          |              |          |          |          |
| [V].APEEHPVLL.[T]_                                       | P60709                                 |        |              |          |         |          |          |              |          |          |          | 55082    | 53542        | 51661    | 47212    | 36563    |          |              |          |          |          |
| [V].APEEHPVLLTEAPLNP.[K]_                                | P60709                                 |        |              |          |         |          |          |              |          |          |          | 180463   | 156283       | 174075   | 161646   | 115832   |          |              |          |          |          |
| [V].APQKMAGASPTKDDSKSDFWK.[M]_                           | Q13438                                 |        |              |          |         |          |          | 31438        |          | 67800    | 50987    |          |              |          |          |          |          |              |          |          |          |
| [V].AQDLNAPSOWDSRGKDS.[Y]_                               | P10451                                 |        |              |          |         |          |          |              |          |          |          |          |              |          |          |          |          |              |          |          |          |
| [V].DADADPRQYADTVKALRV.[R]_                              | P08571                                 |        |              |          |         |          | 61527    | 57931        |          | 54370    |          | 207771   | 211261       | 193349   | 148076   | 84607    |          |              |          |          |          |
| [V].DALRTHLAPYSDEL.[R]_                                  | P02647                                 |        |              |          |         | 29194    |          |              |          |          |          |          |              |          |          |          |          |              |          |          |          |
| [V].DALRTHLAPYSDEL.[Q]_                                  | P02647                                 |        |              |          |         | 47452    | 16341    |              |          | 47952    | 47578    |          |              |          |          |          |          |              |          |          |          |
| [V].DDTQVFRFD.[SN]_                                      | P13746; P30443; Q07000; P30510; P13747 |        |              |          |         |          |          |              |          |          |          |          |              |          |          |          |          |              |          |          |          |
| [V].DDTQVFRFDSDAASPRGEP.[R]_                             | Q07000; P30510                         |        |              |          |         |          |          |              |          |          |          |          |              |          |          |          |          |              |          |          |          |
| [V].DDTQVFRFDSDAASPRGEP.[A]_                             | Q95604                                 |        |              |          |         |          |          |              |          |          |          |          |              |          |          |          |          |              |          |          |          |
| [V].DDTQVFRFDSDAASQKMEPR.[A]_                            | P30443                                 |        |              |          |         |          |          |              |          |          |          |          |              |          |          |          |          |              |          |          |          |
| [V].DFETDVLFLVPTEIALAQHRANA.[K]_                         | P19835                                 |        | 64343        | 37314    |         | 35949    |          |              |          |          |          |          |              |          |          |          |          |              |          |          |          |
| [V].DLDDLMSYEQLMQLYSARQ.[R]_                             | P62841                                 |        | 122739       | 90637    |         | 47155    | 928579   | 894918       | 536657   | 446251   | 445105   | 120059   | 17893        | 122263   | 88548    | 56990    | 39563    | 42618        | 33744    | 33380    | 23779    |
| [V].DPQPSVVTRYVNN.[L]_                                   | Q99541                                 |        |              |          |         |          |          |              |          |          |          | 258528   | 297596       | 408772   | 259631   | 159920   | 29871    | 22286        | 20346    | 21913    | 10990    |

| Quantified modified peptide sequence | Protein ID | A_800c | A_200c_120h | A_40c_6h | A_RT_6h | A_RT_24h | B_800c | B_200c_120h | B_40c_6h | B_RT_6h | B_RT_24h | C_800c  | C_200c_120h | C_40c_6h | C_RT_6h | C_RT_24h | D_800c | D_200c_120h | D_40c_6h | D_RT_6h | D_RT_24h |        |
|--------------------------------------|------------|--------|-------------|----------|---------|----------|--------|-------------|----------|---------|----------|---------|-------------|----------|---------|----------|--------|-------------|----------|---------|----------|--------|
| [V].DPQPSVTVRVNVLPLV.[S]_            | Q99541     |        |             |          |         |          |        |             |          |         |          | 32578   |             | 57766    | 30289   |          |        |             |          |         |          |        |
| [V].DSGSEEQGGSSRALVSTLVLPL.[G]_      | P01833     |        |             |          |         |          |        |             |          |         |          | 1976863 | 1928045     | 2159867  | 1841464 | 963675   | 902414 | 786856      | 783500   | 775221  | 521154   |        |
| [V].DSGSEEQGGSSRALVSTLVLPLVL.[A]_    | P01833     |        |             |          |         |          |        |             |          |         |          | 108874  | 106323      | 103279   | 85209   | 43208    |        |             |          |         |          |        |
| [V].DSKNFDDYMKSLGVGFAT.[R]_          | P05413     |        |             |          |         |          |        |             |          |         | 63683    |         |             |          |         |          |        |             |          |         |          |        |
| [V].DVTLDPDTAHPHLF.[L]_              | Q13410     |        |             |          |         |          | 24196  | 36935       | 140333   |         |          | 422834  | 401633      | 631052   | 401463  | 210098   |        |             |          |         |          |        |
| [V].DVTLDPDTAHPHLFLY.[E]_            | Q13410     |        |             |          |         |          |        |             |          |         |          | 42603   | 23835       | 75098    | 53820   | 21094    |        |             |          |         |          |        |
| [V].DVTLDPDTAHPHLFLYEDSK.[S]_        | Q13410     |        |             |          |         |          |        |             |          |         |          | 47752   |             | 38717    | 39801   |          |        |             |          |         |          |        |
| [V].EGFDLVQKPS.[Y]_                  | Q99541     |        |             |          |         |          | 47892  | 52595       |          | 38027   | 53563    |         |             |          |         |          |        |             |          |         |          |        |
| [V].EISIPASSLPRL.[T]_                | Q13410     |        |             |          |         |          | 102423 | 94434       |          |         |          |         |             |          |         |          |        | 71936       | 107486   | 41639   | 23809    |        |
| [V].EISIPASSLPRLT.[P]_               | Q13410     |        |             |          |         |          | 44877  | 28800       | 81596    | 19630   | 35281    |         |             |          |         |          |        |             |          |         |          |        |
| [V].EISIPASSLPRLTP.[W]_              | Q13410     |        |             |          |         |          | 70359  | 77195       | 57117    | 36814   |          |         |             |          |         |          |        |             |          |         |          |        |
| [V].EISIPASSLPRLTPW.[I]_             | Q13410     |        |             |          |         |          |        | 96052       |          |         |          | 48261   | 52213       | 61218    | 43330   | 18119    | 54902  | 154792      | 62810    | 89578   | 27100    |        |
| [V].EISIPASSLPRLTPWIVAV.[A]_         | Q13410     |        |             |          |         |          | 96984  | 54109       | 264013   | 64940   |          |         |             |          |         |          |        |             |          |         |          |        |
| [V].EKVKHEDQQQGEDEHQDK.[I]_          | P05814     |        |             |          |         | 35746    | 46710  | 52872       | 72965    | 55775   | 12860    |         |             |          |         |          |        |             |          |         |          |        |
| [V].EKVKHEDQQQGEDEHQDKYIP.[S]_       | P05814     |        |             |          |         |          | 29277  | 23477       | 59476    | 58646   | 47139    |         |             |          |         |          |        |             |          |         |          |        |
| [V].EKVQAAVGTSAAPVPSDNH.[-]_         | P02649     |        |             |          |         |          | 32206  | 36921       |          | 27291   |          |         |             |          |         |          |        |             |          |         |          |        |
| [V].ENALTKSELLVEQ.[Y]_               | Q99541     |        |             |          |         |          |        |             |          |         |          | 79386   | 98187       | 128004   | 77428   | 46650    |        |             |          |         |          |        |
| [V].EPIPYGLPQNILPLAQPAVV.[L]_        | P05814     |        |             |          |         |          |        |             |          |         |          | 51791   | 65278       | 54154    | 52551   |          |        |             |          |         |          |        |
| [V].EPLRAELQEGARQK.[L]_              | P02647     |        |             |          |         |          |        |             |          |         |          | 27448   | 27012       | 27884    | 15679   |          |        |             |          |         |          |        |
| [V].ETEPEPELR.[Q]_                   | P02649     |        |             |          |         |          | 23139  | 16611       |          | 51270   | 17231    |         |             |          |         |          |        |             |          |         |          |        |
| [V].FPYPYPFRPLPIIP.[F]_              | Q8NFU4     |        |             |          |         |          |        |             |          |         |          |         |             |          |         |          |        | 209691      | 201225   | 156854  | 215211   | 149015 |
| [V].FPYPYPFRPLPIIPFP.[R]_            | Q8NFU4     |        |             |          |         |          |        |             |          |         |          |         |             |          |         |          |        | 92544       | 81926    | 77601   | 64208    | 112415 |
| [V].HRDGREQAEAEQMPFY.[R]_            | Q13410     |        |             |          |         |          | 86124  | 106884      | 111030   | 171337  | 156651   |         |             |          |         |          |        |             |          |         |          |        |
| [V].KHEDQQQGEDEHQDKYIP.[S]_          | P05814     |        |             |          |         | 31112    | 20657  | 25509       | 34887    | 66344   | 53888    |         |             |          |         |          |        |             |          |         |          |        |
| [V].LDSGFREIENK.[A]_                 | P01833     |        |             |          |         |          | 56513  | 73593       | 80591    | 89553   | 45012    | 31443   | 79704       |          |         | 24341    | 32697  | 46359       | 47594    | 31279   | 20873    |        |
| [V].LKSPTIFFDQPIP.[K]_               | P05814     |        |             |          |         |          | 94783  | 72569       | 83766    | 103936  |          | 49823   | 96314       | 29174    | 39276   |          |        |             |          |         |          |        |

| Quantified modified peptide sequence                     | Protein ID     | A_80oC | A_-20oC_120h | A_4oC_6h | A_RT_6h | A_RT_24h | B_-80oC | B_-20oC_120h | B_4oC_6h | B_RT_6h | B_RT_24h | C_-80oC | C_-20oC_120h | C_4oC_6h | C_RT_6h | C_RT_24h | D_-80oC | D_-20oC_120h | D_4oC_6h | D_RT_6h | D_RT_24h |
|----------------------------------------------------------|----------------|--------|--------------|----------|---------|----------|---------|--------------|----------|---------|----------|---------|--------------|----------|---------|----------|---------|--------------|----------|---------|----------|
| [V].TLDPTAHPHLF.[L]_                                     | Q13410         |        |              |          |         |          |         |              |          |         |          | 94781   | 81741        | 160299   | 86478   |          |         |              |          |         |          |
| [V].TLDPTAHPHLFY.[E]_                                    | Q13410         |        |              |          |         |          |         |              |          |         |          | 15075   | 15750        | 36599    |         | 25699    |         |              |          |         |          |
| [V].TTVASHTSDSDVPSGVTEVVVK.[L]_                          | P10909         |        |              |          |         |          |         |              |          |         |          | 48447   | 38597        | 51793    | 34069   | 23564    |         |              |          |         |          |
| [V].VDFETDVLFLVPTIELAALQHRANA.[K]_                       | P19835         |        |              |          |         |          | 227314  | 184982       |          |         | 96124    |         |              |          |         |          |         |              |          |         |          |
| [V].VLPVPQPQEIIMEVPK.[A]_                                | P05814         |        |              |          |         |          | 117457  | 112541       | 88459    | 137573  | 97522    | 71603   | 82782        | 97780    | 202361  | 227658   |         |              |          |         |          |
| [V].VLPVPQPQEIIMEVPKA.[K]_                               | P05814         |        |              |          |         |          | 40436   | 27510        |          | 47034   | 43151    |         |              |          |         |          |         |              |          |         |          |
| [V].VLPVPQPQEIIMEVPKAKDVTYT.[K]_                         | P05814         |        |              |          |         |          | 1625736 | 1788885      | 1368101  | 965167  | 763680   | 441717  | 486231       | 508258   | 432807  | 356704   |         |              |          |         |          |
| [V].VPLDGAQIQIPRDPSSQQLPR.[L]_                           | P49327         |        |              |          |         |          | 92303   | 122934       | 85589    | 70017   | 100319   | 145027  | 129814       | 115239   | 74048   | 89713    | 28736   | 35063        | 20118    |         |          |
| [V].VPYPQRAV.[P]_                                        | P05814         |        |              |          |         |          | 68633   | 68193        | 398807   | 91989   | 46413    | 56711   | 72217        | 46525    | 96985   | 44583    |         |              |          |         |          |
| [V].VPYPQRAVPV.[Q]_                                      | P05814         |        |              |          |         |          | 164149  | 174305       | 54054    | 60423   | 45528    |         |              |          |         |          |         |              |          |         |          |
| [V].VPYPQRAVPVQAL.[L]_                                   | P05814         |        |              |          |         |          | 115491  | 92583        | 102806   | 69107   | 91713    |         |              |          |         |          |         |              |          |         |          |
| [V].VPYPQRAVPVQALL.[L]_                                  | P05814         |        |              |          |         |          |         |              |          |         |          | 155094  | 211395       | 191730   | 302048  | 811567   |         | 46053        | 25492    | 55874   | 142342   |
| [V].VPYPQRAVPVQALLL.[N]_                                 | P05814         |        |              |          | 72992   | 140221   | 123779  | 122024       |          | 229661  | 271875   | 80680   | 81137        | 91552    | 349803  | 1088281  |         |              | 76850    | 313876  |          |
| [V].VPYPQRAVPVQALLN.[Q]_                                 | P05814         |        |              |          |         |          |         |              |          |         |          | 83974   | 104405       | 98498    | 119220  | 713474   |         |              |          |         |          |
| [V].VPYPQRAVPVQALLNQ.[E]_                                | P05814         |        |              |          |         |          | 19725   | 13629        |          | 26508   | 48017    | 29472   | 31037        | 34339    | 42213   | 92243    |         |              |          |         |          |
| [V].YTEGGFVEGVNKKLG.[L]_                                 | P19835         |        |              |          |         |          | 43891   | 56797        |          | 31066   |          |         |              |          |         |          |         |              |          |         |          |
| [V].YTEGGFVEGVNKKLGLLGDSVDIF.[K]_                        | P19835         |        |              |          |         |          | 124830  | 112899       |          | 124901  | 200190   |         |              |          |         |          |         |              |          |         |          |
| [V].YTEGGFVEGVNKKLGLLGDSVDIFK.[G]_                       | P19835         |        |              |          |         |          | 359842  | 397021       | 334298   | 342460  | 122574   |         |              |          |         |          |         |              |          |         |          |
| [V].YTESWAQDPSQENK.[K]_                                  | P19835         |        |              |          |         |          |         | 33430        |          | 24560   | 35979    |         |              |          |         |          |         |              |          |         |          |
| [V].YTESWAQDPSQENKK.[K]_                                 | P19835         |        |              |          |         |          | 72016   | 81193        | 68905    | 54302   | 48874    |         |              |          |         |          |         |              |          |         |          |
| [V].YTKGRVMPVLK.[S]_1xOxidation [M7]                     | P05814         |        |              |          |         |          | 419344  | 411498       | 807530   | 623917  | 125452   |         |              |          |         |          |         |              |          |         |          |
| [V].YTNDKKQWINK.[A]_                                     | P00738         |        |              |          |         |          |         |              |          |         | 35079    |         |              |          |         |          |         |              |          |         |          |
| [W].DDMEKIWH.[H]_                                        | P60709; P68133 |        |              |          |         |          |         |              |          |         |          | 46687   | 51015        | 47695    | 56486   | 61467    |         |              |          |         |          |
| [W].DQEPAREQAGGWWRA.[R]_                                 | Q86X29         |        |              |          |         |          |         |              |          |         |          |         |              |          |         |          |         |              |          |         |          |
| [W].DSRGKDSYETSQLD.[D]_                                  | P10451         |        |              |          |         |          | 249018  | 182418       |          | 84610   | 31070    | 33001   | 31866        | 59640    | 53225   | 65652    |         | 37221        | 35268    | 40862   | 33747    |
| [W].DSRGKDSYETSQLD.D.[Q]_                                | P10451         |        |              |          |         |          |         |              |          |         |          |         |              |          |         |          |         |              |          |         |          |
| [W].EFVRDLLSP.EE.[N]_                                    | Q9UKW6         |        | 70240        | 133108   | 89534   | 46803    |         |              |          |         |          |         |              |          |         |          |         |              | 7954     |         | 36180    |
| [W].EPTYTENGSLYLEITK.[K]_                                | P19835         |        |              |          |         |          | 54248   | 52121        | 68980    | 45046   | 51827    |         |              |          |         |          |         |              |          |         |          |
| [W].LVGPFAPGITEKAPEEKK.[+]                               | O60664         |        |              |          |         |          |         |              |          |         |          | 84417   | 82129        | 66915    | 48438   | 28400    |         |              |          |         |          |
| [W].SVPQPKVLPQIQ.[V]_                                    | P05814         |        |              |          |         |          |         |              |          |         |          |         |              |          |         |          | 233331  | 261124       | 234222   | 172531  | 134409   |
| [W].SVPQPKVLPQIQV.[V]_                                   | P05814         |        |              |          |         |          | 146395  | 97095        | 56713    | 46636   |          | 45064   | 55101        | 39889    | 52927   | 44462    |         |              |          |         |          |
| [W].SVPQPKVLPQIQVVVPYPQRAV.[P]_                          | P05814         |        |              |          |         |          | 138228  | 90585        | 165384   | 61769   | 50622    | 36017   | 37736        | 60951    | 108670  | 185070   |         | 20409        | 32886    |         | 40912    |
| [W].SVPQPKVLPQIQVVVPYPQRAVP.[V]_                         | P05814         |        |              |          |         |          |         |              |          |         |          | 253155  | 270217       | 260476   | 219280  | 179387   |         |              |          |         |          |
| [W].SVPQPKVLPQIQVVVPYPQRAVPVQA.[L]_                      | P05814         |        |              |          |         |          |         |              |          |         |          | 1060405 | 1221191      | 1163248  | 1005768 | 992595   |         |              |          |         |          |
| [W].SVPQPKVLPQIQVVVPYPQRAVPVQAL.[L]_                     | P05814         |        |              |          |         |          |         |              |          |         |          | 18691   | 30027        | 20344    |         | 202066   | 650436  | 640430       | 638058   | 516072  | 488098   |
| [W].SVPQPKVLPQIQVVVPYPQRAVPVQALLL.[N]_                   | P05814         |        |              |          |         |          |         |              |          |         |          | 182113  | 207869       | 173985   | 166802  | 232307   |         |              |          |         |          |
| [W].SVPQPKVLPQIQVVVPYPQRAVPVQALLN.[Q]_                   | P05814         |        |              |          |         |          |         |              |          |         |          | 84105   | 109511       | 34504    | 53117   | 108087   |         |              |          |         |          |
| [W].VGADHADDIQYVFGKPFATPTGVRPQD.[R]_                     | P19835         |        |              |          |         |          | 82545   | 69635        |          | 48322   | 73154    |         |              |          |         |          |         |              |          |         |          |
| [Y].ANPAVVRPHAQIPQ.[R]_                                  | P07498         |        |              |          |         |          |         |              |          |         |          |         |              | 54580    |         | 20064    |         |              |          |         |          |
| [Y].ANPAVVRPHAQIPQ.RQ.[Y]_                               | P07498         |        |              |          |         |          |         |              |          |         |          |         |              |          |         |          |         |              |          |         |          |
| [Y].ANPAVVRPHAQIPQ.RQYLP.[N]_                            | P07498         |        | 35282        |          |         | 34064    |         |              |          |         |          | 79221   | 62942        | 64277    | 86992   | 43961    |         |              |          |         |          |
| [Y].ANPAVVRPHAQIPQ.RQYLPN.[S]_                           | P07498         |        |              |          |         |          |         |              |          |         |          |         |              |          |         |          |         |              |          |         |          |
| [Y].ANPAVVRPHAQIPQ.RQYLPNS.[H]_                          | P07498         |        |              |          |         |          |         |              |          |         |          | 149469  | 183141       | 138070   | 102997  | 109478   |         |              |          |         |          |
| [Y].ANPAVVRPHAQIPQ.RQYLPNSHPPTV.[V]_                     | P07498         |        |              |          |         |          |         |              |          |         |          | 105663  | 107098       | 89904    | 87658   | 108259   |         |              |          |         |          |
| [Y].DAAKRGPGGAWAAEVISNA.[R]_                             | P0DJ19         |        | 56291        | 38150    |         | 30728    |         |              |          |         |          |         |              |          |         |          |         |              |          |         |          |
| [Y].DEGSIIVL.[G]_                                        | P35606         |        |              |          |         |          |         |              |          |         |          | 46556   | 46527        | 60455    | 32978   | 11121    | 32973   | 40938        | 33733    | 30926   | 17042    |
| [Y].DHINEGKLW.[K]_                                       | Q9UDW1         |        |              |          |         |          |         |              |          |         |          |         |              |          |         |          |         |              |          |         |          |
| [Y].DIDVAKVNTURPDGEKK.[A]_                               | P62750         |        |              |          |         | 26585    |         |              |          |         |          | 54082   | 43596        | 50433    | 31689   |          |         |              |          |         |          |
| [Y].DLMSSAYLSTKDQ.[Y]_                                   | Q99541         |        |              |          |         |          |         |              |          |         |          | 71045   | 80880        | 30149    | 64824   | 25366    |         |              |          |         |          |
| [Y].DLMSSAYLSTKDQYPYLK.[S]_                              | Q99541         |        |              |          |         |          |         |              |          |         |          | 217371  | 195671       | 221264   | 160643  | 81895    |         |              |          |         |          |
| [Y].DQALQQAQVDDDANNNAK.[A]_                              | P60033         |        |              |          |         |          | 64501   | 74345        | 71173    | 40070   | 25344    |         |              |          |         |          |         |              |          |         |          |
| [Y].DQSAYDGKDYIALNEDLR.[S]_                              | P30510         |        |              |          |         |          |         |              |          |         |          |         |              |          |         |          |         |              |          |         |          |
| [Y].DSFKLQTKFQVLK.[S]_                                   | P15907         |        |              |          |         | 35031    | 47660   | 37747        |          |         | 91584    |         |              |          |         |          |         |              |          |         |          |
| [Y].EDSKSVRL.E.[D]_                                      | Q13410         |        |              |          |         |          |         |              |          |         |          | 188386  | 191934       | 255003   | 154409  | 74742    |         |              |          |         |          |
| [Y].EEALVHLK.[V]_                                        | Q13410         |        |              |          |         |          | 39944   | 55984        |          | 89117   | 80790    |         |              |          |         |          |         |              |          |         |          |
| [Y].EEIVKEVSTYIKK.[I]_                                   | P68104         |        |              |          |         |          | 47712   |              |          | 85535   | 45744    | 121344  | 98208        | 102230   | 140206  | 95409    | 36409   | 38304        | 28355    |         | 23921    |
| [Y].ETSQLDDQSAETHSH.[K]_                                 | P10451         |        |              |          |         |          |         |              |          |         |          | 98023   | 104860       | 170145   | 190256  | 69079    |         |              |          |         |          |
| [Y].ETSQLDDQSAETHSHK.[Q]_                                | P10451         |        |              |          |         |          |         |              |          |         |          | 84808   | 97875        | 102982   | 112856  | 53743    |         |              |          |         |          |
| [Y].ETSQLDDQSAETHSHKQ.[S]_                               | P10451         |        |              |          |         |          |         |              |          |         |          | 24904   | 24555        | 27196    | 28493   | 25543    |         |              |          |         |          |
| [Y].ETSQLDDQSAETHSHKQS.[R]_                              | P10451         |        |              |          |         |          |         |              |          |         |          | 347352  | 11811        |          | 421853  | 209012   |         |              |          |         |          |
| [Y].ETSQLDDQSAETHSHKQSL.[Y]_                             | P10451         |        |              |          |         |          |         |              |          |         |          | 28658   | 23393        |          | 22626   | 41099    |         |              |          |         |          |
| [Y].ETSQLDDQSAETHSHKQSLY.[K]_                            | P10451         |        |              |          |         |          | 62621   |              | 53362    | 64383   |          | 1005762 | 1297096      | 1157161  | 1266936 | 1101878  |         |              |          |         |          |
| [Y].GLFPQNILPLAQPAVVLVPQPQE.[I]_                         | P05814         |        |              |          |         |          | 83115   | 125117       | 465027   | 94901   | 175555   |         |              |          |         |          |         |              |          |         |          |
| [Y].GLFPQNILPLAQPAVVLVPQPQE.[M]_                         | P05814         |        |              |          |         |          |         |              |          |         |          |         |              |          |         |          |         |              |          |         |          |
| [Y].GLFPQNILPLAQPAVVLVPQPQEIMEVPK.[A]_1xOxidation [M25]  | P05814         |        |              |          |         |          | 339029  | 373015       | 273307   | 231356  | 60925    | 57405   | 34578        | 33562    | 44505   |          | 28879   |              | 17102    |         | 54586    |
| [Y].GLFPQNILPLAQPAVVLVPQPQEIMEVPKA.[K]_1xOxidation [M25] | P05814         |        |              |          |         |          | 33234   | 46184        |          | 98982   |          |         |              |          |         |          |         |              | 60461    |         | 20502    |
| [Y].GLFPQNILPLAQPAVVLVPQPQEIMEVPKA.[D]_                  | P05814         |        |              |          |         |          | 1402966 | 1192522      | 1427449  | 913410  | 259496   | 291833  | 228193       | 250180   | 161087  | 146046   |         |              |          |         |          |
| [Y].GGGSGGGGGGGSGSGSGSGSY.[G]_                           | P35527         |        |              |          |         |          |         |              |          |         |          |         |              |          |         |          |         |              |          |         |          |
| [Y].GTQTLEGGVEKPHSLL.[S]_                                | P01133         |        |              |          |         |          |         |              |          |         |          |         |              |          |         |          |         |              |          |         |          |
| [Y].LPLTEELEKEAK.[K]_                                    | Q99541         |        |              |          |         |          | 38727   | 62858        |          | 62248   | 71327    | 48716   | 59496        | 44893    | 56027   | 30467    |         |              |          |         |          |
| [Y].LPLTEELEKEAKKVE.[G]_                                 | Q99541         |        |              |          |         |          |         |              |          |         |          | 24967   | 22724        |          | 16670   | 14268    |         |              |          |         |          |
| [Y].LPLTEELEKEAKKVEGFDLV.[Q]_                            | Q99541         |        |              |          |         |          |         |              |          |         |          | 127324  | 139118       | 100641   | 132675  | 77729    |         |              |          |         |          |
| [Y].LPNSHPPT.[V]_                                        | P07498         |        |              |          |         |          | 52618   | 58118        | 31668    | 44302   | 14723    |         |              |          |         |          |         |              |          |         |          |
| [Y].LSTKDQYPYLK.[S]_                                     | Q99541         |        |              |          |         |          |         |              |          |         |          | 1269741 | 1458696      | 717309   | 820535  | 520692   | 70911   | 102866       | 93127    | 45931   | 21453    |

| Quantified modified peptide sequence             | Protein ID | A_-80oC | A_-20oC_120h | A_4oC_6h | A_RT_6h | A_RT_24h | B_-80oC | B_-20oC_120h | B_4oC_6h | B_RT_6h | B_RT_24h | C_-80oC | C_-20oC_120h | C_4oC_6h | C_RT_6h | C_RT_24h | D_-80oC | D_-20oC_120h | D_4oC_6h | D_RT_6h | D_RT_24h |        |
|--------------------------------------------------|------------|---------|--------------|----------|---------|----------|---------|--------------|----------|---------|----------|---------|--------------|----------|---------|----------|---------|--------------|----------|---------|----------|--------|
| [Y].MNGMNRQRNLR.[E]_                             | P47710     |         |              |          |         |          | 62530   | 77925        |          |         | 130783   | 64656   |              |          |         |          |         |              |          |         |          |        |
| [Y].NKYPDAAVATWLNPPDS.[Q]_                       | P10451     |         |              |          |         |          | 46594   |              |          |         |          |         | 181420       | 194810   | 185738  | 99786    | 48121   |              | 44024    |         |          |        |
| [Y].NKYPDAAVATWLNPPDSQ.[K]_                      | P10451     |         |              |          |         |          | 62928   | 71774        | 84863    |         | 76451    |         | 306003       | 317060   | 354026  | 284415   | 205260  |              |          |         |          |        |
| [Y].NKYPDAAVATWLNPPDSQK.[L]_                     | P10451     |         |              |          |         |          | 296212  | 307291       | 159591   | 205723  | 545401   |         | 1796433      | 1769186  | 1904845 | 2052026  | 2097887 |              | 28293    |         | 24805    |        |
| [Y].NKYPDAAVATWLNPPDSQKQN.[L]_                   | P10451     |         | 56430        | 62864    |         |          | 99911   | 112882       | 61059    | 78071   |          |         | 657299       | 657474   | 674843  | 817252   | 657319  | 49713        | 62485    | 46000   | 57310    | 46788  |
| [Y].NKYPDAAVATWLNPPDSQKQNLLAPQ.[N]_              | P10451     |         |              |          |         |          | 78475   | 83059        | 290462   | 79155   | 89301    |         | 384257       | 399632   | 471329  | 421375   | 322611  | 124101       | 78489    | 126225  | 266620   | 109277 |
| [Y].NQLQLQAAHAQEQ.[I]_                           | P47710     | 75017   |              | 55638    | 69139   |          | 213225  | 186945       | 116897   | 131755  | 157135   |         | 574059       | 541391   | 555647  | 572663   | 547942  |              |          |         |          |        |
| [Y].PDATDEDTSH.[M]_                              | P10451     |         |              |          |         |          |         |              |          |         |          |         |              |          |         |          |         |              |          |         |          |        |
| [Y].PDATDEDTSHMESEELGAY.[K]_                     | P10451     |         |              |          |         |          | 130418  | 155041       | 114499   | 87729   | 61643    |         | 350494       | 343738   | 334596  | 318604   | 174154  |              |          |         |          |        |
| [Y].PDAAVATWLNPPDSQK.[Q]_                        | P10451     |         |              |          |         |          |         |              |          |         |          |         | 54997        | 58607    | 44082   | 32959    | 34869   |              |          |         |          |        |
| [Y].PERLQNPS.[S]_                                | P47710     |         |              |          |         |          |         |              |          |         |          |         | 112790       | 116699   | 133518  | 126971   | 78080   |              |          |         |          |        |
| [Y].PERLQNPSSESPIPLES.[R]_                       | P47710     |         |              |          |         |          | 1183559 | 849284       | 426773   | 1319968 | 274279   |         | 86554        | 74048    | 72070   | 162081   | 107575  |              |          |         |          |        |
| [Y].PERLQNPSSESPIPLESREYYMNGMN.[R]_              | P47710     |         |              |          |         |          | 63068   | 54487        |          | 38020   | 34816    |         |              |          |         |          |         |              |          |         |          |        |
| [Y].PTYHTHGRVVPSS.[T]_                           | P15941     |         |              |          |         |          |         |              |          |         |          |         | 100576       | 152266   | 147174  | 82401    | 34380   |              |          |         |          |        |
| [Y].PVTQPLAPVHN.[P]_                             | P05814     |         |              |          |         |          |         |              |          |         |          |         | 271922       | 430349   | 296974  | 153459   | 150611  |              | 24984    |         |          |        |
| [Y].SLNGHEFDHVDVKK.[H]_                          | Q08431     |         |              |          |         | 42392    |         |              |          |         | 58831    |         |              |          |         |          |         |              |          |         |          |        |
| [Y].TEGGFVEGVNKKLG.[L]_                          | P19835     |         |              |          |         | 53779    | 153925  | 153756       | 76313    | 192063  | 192737   |         | 42108        | 48167    | 36044   | 114500   | 104978  |              |          |         |          |        |
| [Y].TEGGFVEGVNKKLGLG.[D]_                        | P19835     |         |              |          |         |          | 33906   | 31021        | 59157    | 61899   | 82431    |         |              |          |         |          |         |              |          |         |          |        |
| [Y].TEGGFVEGVNKKLGLGSDVDF.[K]_                   | P19835     |         |              |          |         |          | 525519  | 474739       | 511750   | 401476  | 255359   |         |              |          |         |          |         |              |          |         |          |        |
| [Y].TEGGFVEGVNKKLGLGSDVDFK.[G]_                  | P19835     |         |              |          |         |          | 502925  | 533491       | 373817   | 572674  | 80834    |         |              |          |         |          |         |              |          |         |          |        |
| [Y].TESWAQDPSQENK.[K]_                           | P19835     |         |              |          |         |          | 29468   | 54374        |          | 32532   | 37899    |         |              |          |         |          |         |              |          |         |          |        |
| [Y].TESWAQDPSQENK.[K]_                           | P19835     |         |              |          |         |          | 33007   | 49794        | 54884    | 84073   | 49368    |         |              |          |         |          |         |              |          |         |          |        |
| [Y].TKGRVMPVL.[K]_                               | P05814     |         |              |          |         |          | 99175   | 89932        | 75169    | 411544  | 217784   |         |              |          |         |          |         |              |          |         |          |        |
| [Y].TLNDKKQWINK.[A]_                             | P00738     |         |              |          |         |          | 45330   | 21801        | 154168   | 22328   | 34469    |         |              |          |         |          |         |              |          |         |          |        |
| [Y].TNPAAVAAATSNL.[-]_                           | P15941     |         |              |          |         |          |         |              |          |         |          |         |              |          |         |          |         |              |          |         |          |        |
| [Y].VPPPPFSDISNPTAHE.[N]_                        | P47710     |         |              |          |         |          | 75491   | 68497        | 54777    | 41053   | 30324    |         |              | 20222    | 19676   | 34591    | 26816   | 41965        | 35870    | 38333   | 18195    |        |
| [Y].VPPPPFSDISNPTAHENY.[E]_                      | P47710     |         |              |          |         |          | 54802   |              |          |         |          |         |              |          |         |          |         |              |          |         |          |        |
| [Y].VPMYYVPNSYPYGTNLVQ.[R]_                      | P07498     |         |              |          |         |          |         |              |          |         |          |         | 131406       | 126938   | 115869  | 108218   | 30649   |              |          |         |          |        |
| [Y].VPMYYVPNSYPYGTNLVQR.[R]_                     | P07498     |         |              |          |         |          |         |              |          |         |          |         | 154290       | 97483    | 72952   | 43451    | 28469   |              |          |         |          |        |
| [Y].VPNSYPYGTNLVQR.[R]_                          | P07498     |         |              |          |         |          |         | 39156        |          |         | 27323    |         |              |          |         |          |         |              |          |         |          |        |
| [Y].VPNSYPYGTNLVQRRPAIANNP.[V]_                  | P07498     |         |              |          |         |          |         |              |          |         |          |         | 73417        |          | 89412   |          |         |              |          |         |          |        |
| [Y].YANPAVVRPH.[A]_                              | P07498     |         |              |          |         |          | 84943   | 45143        | 52130    | 242886  | 72001    |         |              |          |         |          |         |              |          |         |          |        |
| [Y].YANPAVVRPHA.[Q]_                             | P07498     |         |              |          |         |          |         |              |          |         |          |         | 26033        |          | 29442   |          | 19414   |              |          |         |          |        |
| [Y].YANPAVVRPHAQIPQRQ.[Y]_                       | P07498     |         |              |          |         |          |         |              |          |         |          |         | 58664        | 47047    | 55664   | 43235    | 73119   |              |          |         |          |        |
| [Y].YANPAVVRPHAQIPQRQYL PNS.[H]_                 | P07498     |         |              |          |         |          |         | 35804        |          |         |          |         | 163683       | 174401   | 117378  | 130373   | 111149  |              |          |         |          |        |
| [Y].YANPAVVRPHAQIPQRQYL PNSHPTTV.[R]_            | P07498     |         |              |          |         |          | 365326  | 272064       | 331254   | 269780  | 460882   |         |              |          |         |          |         |              |          |         |          |        |
| [Y].YLAGRDL SRLPLQGVGSTPLQGGSSNAAAIGQSSGELR.[T]_ | P15291     |         |              |          |         |          | 60424   | 77805        | 108252   |         | 39261    |         |              |          |         |          |         |              |          |         |          |        |

**Supplementary Table S2 Assignment of quantified peptides to proteins.**

Functions and localization of proteins are shown.

| Protein | Entry name  | Gene names | Protein names                                                                                                                                            | function                  | localization                       | all conditions | -80oC  | 6h RT  | 24h RT | 4oC    | -20oC  |
|---------|-------------|------------|----------------------------------------------------------------------------------------------------------------------------------------------------------|---------------------------|------------------------------------|----------------|--------|--------|--------|--------|--------|
| A0JLT2  | MED19_HUMAN | MED19      | Mediator of RNA polymerase II transcription subunit 19 (Lung cancer metastasis-related protein 1)                                                        | regulation                | other (intracellular compartments) | A0JLT2         | A0JLT2 | A0JLT2 | A0JLT2 | A0JLT2 | A0JLT2 |
| A6ND01  | JUNO_HUMAN  | IZUMO1R    | Sperm-egg fusion protein Juno (Folate receptor 4)                                                                                                        | other                     | integral component of membrane     | A6ND01         | A6ND01 | A6ND01 | A6ND01 | A6ND01 | A6ND01 |
| B1AK53  | ESPN_HUMAN  | ESPN       | Espin (Autosomal recessive deafness type 36 protein)                                                                                                     | other                     | other (intracellular compartments) | B1AK53         | B1AK53 | B1AK53 | B1AK53 | B1AK53 | B1AK53 |
| O00161  | SNP23_HUMAN | SNAP23     | Synaptosomal-associated protein 23 (SNAP-23)                                                                                                             | transport                 | extracellular exosome              | O00161         | O00161 | O00161 | O00161 | O00161 | O00161 |
| O00264  | PGRC1_HUMAN | PGRMC1     | Membrane-associated progesterone receptor component 1 (mPR)                                                                                              | other                     | integral component of membrane     | O00264         | O00264 | O00264 | O00264 | O00264 | O00264 |
| O00391  | QSOX1_HUMAN | QSOX1      | Sulphydryl oxidase 1 (hQSOX) (EC 1.8.3.2)                                                                                                                | regulation                | integral component of membrane     | O00391         | O00391 | O00391 | O00391 | O00391 | O00391 |
| O00560  | SDCB1_HUMAN | SDCBP      | Syntenin-1 (Melanoma differentiation-associated protein 9) (MDA-9)                                                                                       | migration                 | extracellular exosome              | O00560         | O00560 | O00560 | O00560 | O00560 | O00560 |
| O00592  | PODXL_HUMAN | PODXL      | Podocalyxin (GCTM-2 antigen)                                                                                                                             | migration                 | integral component of membrane     | O00592         | O00592 | O00592 | O00592 | O00592 | O00592 |
| O14669  | TMG2_HUMAN  | PRRG2      | Transmembrane gamma-carboxyglutamic acid protein 2 (Proline-rich gamma-carboxyglutamic acid protein 2)                                                   | other                     | integral component of membrane     | O14669         | O14669 | O14669 | O14669 | O14669 | O14669 |
| O14672  | ADA10_HUMAN | ADAM10     | Disintegrin and metalloproteinase domain-containing protein 10 (ADAM 10) (EC 3.4.24.81)                                                                  | response to cytokine      | integral component of membrane     | O14672         | O14672 | O14672 | O14672 | O14672 | O14672 |
| O15016  | TRI66_HUMAN | TRIM66     | Tripartite motif-containing protein 66                                                                                                                   | regulation                | other (intracellular compartments) | O15016         | O15016 | O15016 | O15016 | O15016 | O15016 |
| O15018  | PDZD2_HUMAN | PDZD2      | PDZ domain-containing protein 2 (Activated in prostate cancer protein)                                                                                   | other                     | endoplasmic reticulum              | O15018         | O15018 | O15018 | O15018 | O15018 | O15018 |
| O15162  | PLS1_HUMAN  | PLSCR1     | Phospholipid scramblase 1 (PL scramblase 1)                                                                                                              | acute phase response      | extracellular matrix               | O15162         | O15162 | O15162 | O15162 | O15162 | O15162 |
| O15232  | MATN3_HUMAN | MATN3      | Matrilin-3                                                                                                                                               | metabolism                | extracellular matrix               | O15232         | O15232 | O15232 | O15232 | O15232 | O15232 |
| O15498  | YKT6_HUMAN  | YKT6       | Synaptobrevin homolog YKT6 (EC 2.3.1.-)                                                                                                                  | transport                 | integral component of membrane     | O15498         | O15498 | O15498 | O15498 | O15498 | O15498 |
| O43581  | SYT7_HUMAN  | SYT7       | Synaptotagmin-7 (IPCA-7)                                                                                                                                 | response (other)          | integral component of membrane     | O43581         | O43581 | O43581 | O43581 | O43581 | O43581 |
| O43768  | ENSA_HUMAN  | ENSA       | Alpha-endosulfine (ARPP-19e)                                                                                                                             | response to nutrient      | other (intracellular compartments) | O43768         | O43768 | O43768 | #NV    | #NV    | O43768 |
| O60266  | ADCY3_HUMAN | ADCY3      | Adenylate cyclase type 3 (EC 4.6.1.1) (ATP pyrophosphate-lyase 3)                                                                                        | response to nutrient      | integral component of membrane     | O60266         | O60266 | O60266 | O60266 | O60266 | O60266 |
| O60543  | CIDEA_HUMAN | CIDEA      | Cell death activator CIDE-A (Cell death-inducing DFFA-like effector A)                                                                                   | adaptive immune response  | lipid droplet                      | O60543         | O60543 | O60543 | O60543 | O60543 | O60543 |
| O60664  | PLIN3_HUMAN | PLIN3      | Perilipin-3 (47 kDa mannose 6-phosphate receptor-binding protein)                                                                                        | transport                 | lipid droplet                      | O60664         | O60664 | O60664 | O60664 | O60664 | O60664 |
| O75888  | TNF13_HUMAN | TNFSF13    | Tumor necrosis factor ligand superfamily member 13 (A proliferation-inducing ligand)                                                                     | adaptive immune response  | extracellular exosome              | O75888         | O75888 | O75888 | O75888 | O75888 | O75888 |
| O75954  | TSN9_HUMAN  | TSAN9      | Tetraspanin-9 (Tspan-9)                                                                                                                                  | other                     | integral component of membrane     | O75954         | O75954 | O75954 | O75954 | O75954 | O75954 |
| O94985  | CSTN1_HUMAN | CLSTN1     | Calsyntenin-1 (Alcadein-alpha)                                                                                                                           | regulation                | integral component of membrane     | O94985         | O94985 | O94985 | O94985 | O94985 | O94985 |
| O95436  | NPT2B_HUMAN | SLC34A2    | Sodium-dependent phosphate transport protein 2B                                                                                                          | response to hormone       | integral component of membrane     | O95436         | O95436 | #NV    | #NV    | #NV    | O95436 |
| P00709  | LALBA_HUMAN | LALBA      | Alpha-lactalbumin (Lactose synthase B protein)                                                                                                           | antimicrobial response    | extracellular region/space         | P00709         | P00709 | P00709 | P00709 | #NV    | P00709 |
| P00734  | THRB_HUMAN  | F2         | Prothrombin (EC 3.4.21.5) (Coagulation factor II)                                                                                                        | antimicrobial response    | extracellular exosome              | P00734         | P00734 | P00734 | P00734 | P00734 | P00734 |
| P00738  | HPT_HUMAN   | HP         | Haptoglobin (Zonulin)                                                                                                                                    | acute phase response      | extracellular exosome              | P00738         | P00738 | P00738 | P00738 | P00738 | P00738 |
| P00747  | PLMN_HUMAN  | PLG        | Plasminogen (EC 3.4.21.7)                                                                                                                                | migration                 | extracellular matrix               | P00747         | P00747 | P00747 | P00747 | P00747 | P00747 |
| P01023  | A2MG_HUMAN  | A2M        | Alpha-2-macroglobulin (Alpha-2-M)                                                                                                                        | regulation                | extracellular matrix               | P01023         | P01023 | #NV    | P01023 | P01023 | #NV    |
| P01024  | CO3_HUMAN   | C3         | Complement C3 (C3 and PZP-like alpha-2-macroglobulin domain-containing protein 1)                                                                        | adaptive immune response  | extracellular exosome              | P01024         | P01024 | P01024 | P01024 | P01024 | P01024 |
| P01133  | EGF_HUMAN   | EGF        | Pro-epidermal growth factor (EGF)                                                                                                                        | migration                 | integral component of membrane     | P01133         | P01133 | #NV    | P01133 | P01133 | P01133 |
| P01833  | PIGR_HUMAN  | PIGR       | Polymeric immunoglobulin receptor (PIgR)                                                                                                                 | other                     | integral component of membrane     | P01833         | P01833 | P01833 | P01833 | P01833 | P01833 |
| P02647  | APOA1_HUMAN | APOA1      | Apolipoprotein A-I (Apo-AI)                                                                                                                              | adaptive immune response  | lipoprotein particle               | P02647         | P02647 | P02647 | P02647 | P02647 | P02647 |
| P02649  | APOE_HUMAN  | APOE       | Apolipoprotein E (Apo-E)                                                                                                                                 | adaptive immune response  | lipoprotein particle               | P02649         | P02649 | P02649 | P02649 | P02649 | P02649 |
| P02654  | APOC1_HUMAN | APOC1      | Apolipoprotein C-I (Apo-CI)                                                                                                                              | regulation                | lipoprotein particle               | P02654         | P02654 | #NV    | P02654 | #NV    | #NV    |
| P02656  | APOC3_HUMAN | APOC3      | Apolipoprotein C-III (Apo-CIII)                                                                                                                          | regulation                | lipoprotein particle               | P02656         | P02656 | P02656 | P02656 | P02656 | P02656 |
| P02671  | FIBA_HUMAN  | FGA        | Fibrinogen alpha chain                                                                                                                                   | adaptive immune response  | extracellular matrix               | P02671         | P02671 | P02671 | P02671 | P02671 | P02671 |
| P02675  | FIBB_HUMAN  | FGB        | Fibrinogen beta chain                                                                                                                                    | adaptive immune response  | extracellular matrix               | P02675         | P02675 | P02675 | P02675 | P02675 | P02675 |
| P02679  | FIBG_HUMAN  | FGG        | Fibrinogen gamma chain                                                                                                                                   | response to cytokine      | extracellular matrix               | P02679         | P02679 | P02679 | P02679 | P02679 | P02679 |
| P02788  | TRFL_HUMAN  | LTF        | Lactotransferrin (Lactoferrin) (EC 3.4.21.-) (Growth-inhibiting protein 12)                                                                              | antimicrobial response    | extracellular exosome              | P02788         | P02788 | P02788 | P02788 | P02788 | P02788 |
| P02810  | PRPC_HUMAN  | PRH1; PRH2 | Salivary acidic proline-rich phosphoprotein 1/2 (Db-s) (PRP-1/PRP-2)                                                                                     | other                     | extracellular region/space         | P02810         | P02810 | P02810 | P02810 | P02810 | P02810 |
| P04233  | HG2A_HUMAN  | CD74       | HLA class II histocompatibility antigen gamma chain (HLA-DR antigens-associated invariant chain)                                                         | adaptive immune response  | integral component of membrane     | P04233         | P04233 | P04233 | P04233 | P04233 | P04233 |
| P04792  | HSPB1_HUMAN | HSPB1      | Heat shock protein beta-1 (HspB1) (28 kDa heat shock protein)                                                                                            | response to growth factor | extracellular exosome              | P04792         | P04792 | P04792 | P04792 | P04792 | P04792 |
| P04843  | RPN1_HUMAN  | RPN1       | Dolichyl-diphosphooligosaccharide--protein glycosyltransferase subunit 1 (Dolichyl-diphosphooligosaccharide--protein glycosyltransferase 67 kDa subunit) | other                     | integral component of membrane     | P04843         | P04843 | P04843 | P04843 | #NV    | P04843 |
| P05067  | A4_HUMAN    | APP        | Amyloid-beta precursor protein (APP)                                                                                                                     | antimicrobial response    | integral component of membrane     | P05067         | P05067 | P05067 | P05067 | P05067 | P05067 |
| P05413  | FABPH_HUMAN | FABP3      | Fatty acid-binding protein, heart (Fatty acid-binding protein 3)                                                                                         | response (other)          | extracellular region/space         | P05413         | #NV    | #NV    | P05413 | #NV    | #NV    |
| P05783  | K1C18_HUMAN | KRT18      | Keratin, type I cytoskeletal 18 (Cell proliferation-inducing gene 46 protein)                                                                            | regulation                | extracellular exosome              | P05783         | P05783 | P05783 | P05783 | #NV    | P05783 |
| P05814  | CASB_HUMAN  | CSN2       | Beta-casein                                                                                                                                              | regulation                | extracellular region/space         | P05814         | P05814 | P05814 | P05814 | P05814 | P05814 |
| P06454  | PTMA_HUMAN  | PTMA       | Prothymosin alpha                                                                                                                                        | regulation                | other (intracellular compartments) | P06454         | P06454 | #NV    | #NV    | #NV    | #NV    |
| P06858  | LPL_HUMAN   | LPL        | Lipoprotein lipase (LPL) (EC 3.1.1.34)                                                                                                                   | response to nutrient      | lipoprotein particle               | P06858         | P06858 | P06858 | P06858 | P06858 | P06858 |
| P07195  | LDHB_HUMAN  | LDHB       | L-lactate dehydrogenase B chain (LDH-B) (EC 1.1.1.27)                                                                                                    | metabolism                | extracellular exosome              | P07195         | P07195 | P07195 | #NV    | P07195 | #NV    |
| P07498  | CASK_HUMAN  | CSN3       | Kappa-casein                                                                                                                                             | transport                 | extracellular region/space         | P07498         | P07498 | P07498 | P07498 | P07498 | P07498 |
| P07900  | HS90A_HUMAN | HSP90AA1   | Heat shock protein HSP 90-alpha (Heat shock 86 kDa)                                                                                                      | response to stress        | extracellular exosome              | P07900         | P07900 | P07900 | P07900 | P07900 | P07900 |
| P07910  | HNRPC_HUMAN | HNRNPC     | Heterogeneous nuclear ribonucleoproteins C1/C2 (hnRNP C1/C2)                                                                                             | regulation                | extracellular exosome              | P07910         | P07910 | P07910 | P07910 | P07910 | P07910 |
| P08571  | CD14_HUMAN  | CD14       | Monocyte differentiation antigen CD14 (Myeloid cell-specific leucine-rich glycoprotein)                                                                  | adaptive immune response  | integral component of membrane     | P08571         | P08571 | P08571 | #NV    | #NV    | P08571 |
| P09603  | CSF1_HUMAN  | CSF1       | Macrophage colony-stimulating factor 1 (CSF-1)                                                                                                           | adaptive immune response  | integral component of membrane     | P09603         | P09603 | P09603 | P09603 | P09603 | P09603 |
| POCOL4  | CO4A_HUMAN  | C4A        | Complement C4-A (Acidic complement C4)                                                                                                                   | adaptive immune response  | extracellular exosome              | POCOL4         | POCOL4 | POCOL4 | POCOL4 | POCOL4 | POCOL4 |

|        |              |         |                                                                                           |                           |                                    |        |        |        |        |        |        |
|--------|--------------|---------|-------------------------------------------------------------------------------------------|---------------------------|------------------------------------|--------|--------|--------|--------|--------|--------|
| P0DJJ8 | SAA1_HUMAN   | SAA1    | Serum amyloid A-1 protein (SAA)                                                           | acute phase response      | lipoprotein particle               | P0DJJ8 | P0DJJ8 | P0DJJ8 | P0DJJ8 | P0DJJ8 | P0DJJ8 |
| P0DJJ9 | SAA2_HUMAN   | SAA2    | Serum amyloid A-2 protein (SAA2)                                                          | acute phase response      | lipoprotein particle               | P0DJJ9 | P0DJJ9 | P0DJJ9 | P0DJJ9 | P0DJJ9 | P0DJJ9 |
| P10323 | ACRO_HUMAN   | ACR     | Acrosin (EC 3.4.21.10)                                                                    | response to hormone       | extracellular exosome              | P10323 | P10323 | P10323 | P10323 | P10323 | P10323 |
| P10412 | H14_HUMAN    | H1-4    | Histone H1.4 (Histone H1b)                                                                | regulation                | other (intracellular compartments) | P10412 | P10412 | P10412 | P10412 | P10412 | P10412 |
| P10451 | OSTP_HUMAN   | SPP1    | Osteopontin (Bone sialoprotein 1)                                                         | response to hormone       | extracellular exosome              | P10451 | P10451 | P10451 | P10451 | P10451 | P10451 |
| P10586 | PTPRF_HUMAN  | PTPRF   | Receptor-type tyrosine-protein phosphatase F (EC 3.1.3.48)                                | migration                 | integral component of membrane     | P10586 | P10586 | P10586 | P10586 | P10586 | P10586 |
| P10909 | CLUS_HUMAN   | CLU     | Clusterin (Aging-associated gene 4 protein) (Apolipoprotein J)                            | antimicrobial response    | extracellular matrix               | P10909 | P10909 | P10909 | P10909 | P10909 | P10909 |
| P11021 | BIP_HUMAN    | HSPA5   | Endoplasmic reticulum chaperone BIP (EC 3.6.4.10) (78 kDa glucose-regulated protein)      | response to nutrient      | integral component of membrane     | P11021 | P11021 | P11021 | P11021 | P11021 | P11021 |
| P12272 | PTHr_HUMAN   | PTHr    | Parathyroid hormone-related protein (PTH-rP)                                              | regulation                | extracellular region/space         | P12272 | P12272 | P12272 | P12272 | P12272 | P12272 |
| P13746 | HLAA_HUMAN   | HLA-A   | HLA class I histocompatibility antigen, A alpha chain (Human leukocyte antigen A) (HLA-A) | adaptive immune response  | endoplasmic reticulum              | P13746 | P13746 | P13746 | P13746 | P13746 | P13746 |
| P13747 | HLAE_HUMAN   | HLA-E   | HLA class I histocompatibility antigen, alpha chain E (MHC class I antigen E)             | adaptive immune response  | integral component of membrane     | P13747 | P13747 | P13747 | P13747 | P13747 | P13747 |
| P15291 | B4GT1_HUMAN  | B4GALT1 | Beta-1,4-galactosyltransferase 1 (Beta-1,4-GalTase 1)                                     | acute phase response      | integral component of membrane     | P15291 | P15291 | P15291 | P15291 | P15291 | P15291 |
| P15515 | HIS1_HUMAN   | HTN1    | Histatin-1 (Histidine-rich protein 1)                                                     | antimicrobial response    | extracellular region/space         | P15515 | P15515 | P15515 | #NV    | P15515 | P15515 |
| P15907 | SIAT1_HUMAN  | ST6GAL1 | Beta-galactoside alpha-2,6-sialyltransferase 1 (Alpha 2,6-ST 1) (EC 2.4.99.1)             | adaptive immune response  | integral component of membrane     | P15907 | P15907 | P15907 | P15907 | P15907 | P15907 |
| P15941 | MUC1_HUMAN   | MUC1    | Mucin-1 (MUC-1) (Breast carcinoma-associated antigen DF3)                                 | response to stress        | integral component of membrane     | P15941 | P15941 | P15941 | P15941 | P15941 | P15941 |
| P17987 | TCPA_HUMAN   | TCP1    | T-complex protein 1 subunit alpha (TCP-1-alpha)                                           | regulation                | extracellular exosome              | P17987 | P17987 | P17987 | P17987 | P17987 | P17987 |
| P18827 | SDC1_HUMAN   | SDC1    | Syndecan-1 (SYND1)                                                                        | response (other)          | integral component of membrane     | P18827 | P18827 | P18827 | P18827 | P18827 | P18827 |
| P19440 | GGT1_HUMAN   | GGT1    | Glutathione hydrolase 1 proenzyme (EC 3.4.19.13) (Gamma-glutamyltransferase 1)            | adaptive immune response  | integral component of membrane     | P19440 | P19440 | P19440 | P19440 | P19440 | P19440 |
| P19634 | SL9A1_HUMAN  | SLC9A1  | Sodium/hydrogen exchanger 1 (APNH) (Na(+)/H(+)) antiporter, amiloride-sensitive)          | response to hypoxia       | integral component of membrane     | P19634 | P19634 | P19634 | #NV    | P19634 | P19634 |
| P19835 | CEL_HUMAN    | CEL     | Bile salt-activated lipase (BAL) (EC 3.1.1.13)                                            | metabolism                | integral component of membrane     | P19835 | P19835 | P19835 | P19835 | P19835 | P19835 |
| P20138 | CD33_HUMAN   | CD33    | Myeloid cell surface antigen CD33 (Sialic acid-binding Ig-like lectin 3)                  | adaptive immune response  | integral component of membrane     | P20138 | P20138 | P20138 | P20138 | P20138 | P20138 |
| P20671 | H2A1D_HUMAN  | H2AC7   | Histone H2A type 1-D (Histone H2A.3)                                                      | other                     | extracellular exosome              | P20671 | P20671 | #NV    | #NV    | P20671 | P20671 |
| P22079 | PERL_HUMAN   | LPO     | Lactoperoxidase (LPO) (EC 1.11.1.7) (Salivary peroxidase)                                 | antimicrobial response    | extracellular exosome              | P22079 | P22079 | P22079 | P22079 | P22079 | P22079 |
| P22897 | MRC1_HUMAN   | MRC1    | Macrophage mannose receptor 1 (MMR) (C-type lectin domain family 13 member D)             | response to cytokine      | integral component of membrane     | P22897 | P22897 | P22897 | P22897 | P22897 | P22897 |
| P24821 | TENA_HUMAN   | TNC     | Tenascin (TN) (Cytotactin) (GMEM)                                                         | response (other)          | extracellular matrix               | P24821 | P24821 | P24821 | P24821 | P24821 | P24821 |
| P24844 | MYL9_HUMAN   | MYL9    | Myosin regulatory light polypeptide 9 (20 kDa myosin light chain)                         | regulation                | other (intracellular compartments) | P24844 | P24844 | P24844 | P24844 | P24844 | P24844 |
| P28300 | LYOX_HUMAN   | LOX     | Protein-lysine 6-oxidase (EC 1.4.3.13) (Lysyl oxidase)                                    | response to hormone       | extracellular matrix               | P28300 | P28300 | P28300 | P28300 | P28300 | P28300 |
| P30443 | HLAA_HUMAN   | HLA-A   | HLA class I histocompatibility antigen, A alpha chain                                     | adaptive immune response  | endoplasmic reticulum              | P30443 | #NV    | #NV    | P30443 | P30443 | P30443 |
| P30510 | HLAC_HUMAN   | HLA-C   | HLA class I histocompatibility antigen, C alpha chain (HLA-C)                             | adaptive immune response  | endoplasmic reticulum              | P30510 | P30510 | P30510 | P30510 | P30510 | P30510 |
| P31431 | SDC4_HUMAN   | SDC4    | Syndecan-4 (SYND4)                                                                        | migration                 | integral component of membrane     | P31431 | P31431 | P31431 | P31431 | P31431 | P31431 |
| P33121 | ACSL1_HUMAN  | ACSL1   | Long-chain-fatty-acid--CoA ligase 1 (EC 6.2.1.3)                                          | response to nutrient      | integral component of membrane     | P33121 | P33121 | P33121 | P33121 | P33121 | P33121 |
| P34741 | SDC2_HUMAN   | SDC2    | Syndecan-2 (SYND2) (Fibroglycan)                                                          | migration                 | extracellular matrix               | P34741 | P34741 | P34741 | P34741 | P34741 | P34741 |
| P35527 | K1C9_HUMAN   | KRT9    | Keratin, type I cytoskeletal 9 (Cytokeratin-9)                                            | other                     | extracellular exosome              | P35527 | P35527 | P35527 | P35527 | P35527 | P35527 |
| P35542 | SAA4_HUMAN   | SAA4    | Serum amyloid A-4 protein (Constitutively expressed serum amyloid A protein)              | acute phase response      | lipoprotein particle               | P35542 | P35542 | P35542 | P35542 | P35542 | P35542 |
| P35606 | COPB2_HUMAN  | COPB2   | Coatomer subunit beta' (Beta')-coat protein)                                              | transport                 | endoplasmic reticulum              | P35606 | P35606 | P35606 | P35606 | P35606 | P35606 |
| P36578 | RL4_HUMAN    | RPL4    | 60S ribosomal protein L4 (60S ribosomal protein L1)                                       | RNA catabolic process     | extracellular exosome              | P36578 | #NV    | P36578 | #NV    | P36578 | P36578 |
| P37802 | TAGL2_HUMAN  | TAGLN2  | Transgelin-2 (Epididymis tissue protein Li 7e)                                            | other                     | extracellular exosome              | P37802 | P37802 | P37802 | P37802 | P37802 | P37802 |
| P39019 | RS19_HUMAN   | RPS19   | 40S ribosomal protein S19 (Small ribosomal subunit protein eS19)                          | antimicrobial response    | extracellular exosome              | P39019 | P39019 | P39019 | P39019 | P39019 | P39019 |
| P46778 | RL21_HUMAN   | RPL21   | 60S ribosomal protein L21 (Large ribosomal subunit protein eL21)                          | RNA catabolic process     | endoplasmic reticulum              | P46778 | P46778 | P46778 | #NV    | P46778 | P46778 |
| P47710 | CASA1_HUMAN  | CSN1S1  | Alpha-S1-casein                                                                           | response to hormone       | extracellular region/space         | P47710 | P47710 | P47710 | P47710 | P47710 | P47710 |
| P47914 | RL29_HUMAN   | RPL29   | 60S ribosomal protein L29 (Cell surface heparin-binding protein HIP)                      | RNA catabolic process     | other (intracellular compartments) | P47914 | #NV    | #NV    | P47914 | #NV    | #NV    |
| P47989 | XDH_HUMAN    | XDH     | Xanthine dehydrogenase/oxidase                                                            | regulation                | extracellular region/space         | P47989 | P47989 | P47989 | P47989 | P47989 | P47989 |
| P49327 | FAS_HUMAN    | FASN    | Fatty acid synthase (EC 2.3.1.85)                                                         | response to cytokine      | extracellular exosome              | P49327 | P49327 | P49327 | P49327 | P49327 | P49327 |
| P50591 | TNF10_HUMAN  | TNFSF10 | Tumor necrosis factor ligand superfamily member 10 (Apo-2 ligand)                         | adaptive immune response  | integral component of membrane     | P50591 | P50591 | P50591 | P50591 | P50591 | P50591 |
| P53999 | TCP4_HUMAN   | SUB1    | Activated RNA polymerase II transcriptional coactivator p15 (Positive cofactor 4)         | regulation                | extracellular exosome              | P53999 | P53999 | P53999 | P53999 | P53999 | P53999 |
| P55036 | PSMD4_HUMAN  | PSMD4   | 26S proteasome non-ATPase regulatory subunit 4 (26S proteasome regulatory subunit RPN10)  | response to hypoxia       | other (intracellular compartments) | P55036 | P55036 | P55036 | P55036 | P55036 | P55036 |
| P55327 | TPD52_HUMAN  | TPD52   | Tumor protein D52 (Protein N8)                                                            | other                     | endoplasmic reticulum              | P55327 | P55327 | P55327 | P55327 | P55327 | P55327 |
| P60033 | CD81_HUMAN   | CD81    | CD81 antigen (26 kDa cell surface protein TAPA-1)                                         | adaptive immune response  | integral component of membrane     | P60033 | P60033 | P60033 | P60033 | P60033 | P60033 |
| P60468 | SEC61B_HUMAN | SEC61B  | Protein transport protein Sec61 subunit beta                                              | transport                 | integral component of membrane     | P60468 | P60468 | P60468 | P60468 | P60468 | P60468 |
| P60709 | ACTB_HUMAN   | ACTB    | Actin, cytoplasmic 1 (Beta-actin)                                                         | response (other)          | extracellular exosome              | P60709 | P60709 | P60709 | P60709 | P60709 | P60709 |
| P60866 | RS20_HUMAN   | RPS20   | 40S ribosomal protein S20 (Small ribosomal subunit protein uS10)                          | RNA catabolic process     | extracellular exosome              | P60866 | P60866 | P60866 | P60866 | P60866 | P60866 |
| P61769 | B2MG_HUMAN   | B2M     | Beta-2-microglobulin                                                                      | antimicrobial response    | extracellular exosome              | P61769 | P61769 | #NV    | P61769 | P61769 | P61769 |
| P62269 | RS18_HUMAN   | RPS18   | 40S ribosomal protein S18 (Ke-3)                                                          | RNA catabolic process     | extracellular exosome              | P62269 | P62269 | P62269 | #NV    | P62269 | P62269 |
| P62277 | RS13_HUMAN   | RPS13   | 40S ribosomal protein S13 (Small ribosomal subunit protein uS15)                          | regulation                | extracellular exosome              | P62277 | P62277 | P62277 | P62277 | P62277 | P62277 |
| P62306 | RUXF_HUMAN   | SNRPF   | Small nuclear ribonucleoprotein F (snRNP-F)                                               | metabolism                | other (intracellular compartments) | P62306 | P62306 | #NV    | #NV    | #NV    | #NV    |
| P62328 | TYB4_HUMAN   | TMSB4X  | Thymosin beta-4 (T beta-4) (Fx)                                                           | response (other)          | extracellular region/space         | P62328 | P62328 | P62328 | P62328 | P62328 | P62328 |
| P62333 | PRS10_HUMAN  | PSMC6   | 26S proteasome regulatory subunit 10B (26S proteasome AAA-ATPase subunit RPT4)            | response to hypoxia       | extracellular exosome              | P62333 | P62333 | P62333 | P62333 | P62333 | P62333 |
| P62750 | RL23A_HUMAN  | RPL23A  | 60S ribosomal protein L23a (Large ribosomal subunit protein uL23)                         | RNA catabolic process     | extracellular exosome              | P62750 | P62750 | P62750 | #NV    | P62750 | P62750 |
| P62841 | RS15_HUMAN   | RPS15   | 40S ribosomal protein S15 (RIG protein)                                                   | RNA catabolic process     | other (intracellular compartments) | P62841 | #NV    | #NV    | #NV    | P62841 | #NV    |
| P62937 | PPIA_HUMAN   | PPIA    | Peptidyl-prolyl cis-trans isomerase A (PPIase A) (EC 5.2.1.8) (Cyclophilin A)             | migration                 | extracellular exosome              | P62937 | P62937 | P62937 | P62937 | #NV    | P62937 |
| P63220 | RS21_HUMAN   | RPS21   | 40S ribosomal protein S21 (Small ribosomal subunit protein eS21)                          | RNA catabolic process     | endoplasmic reticulum              | P63220 | P63220 | P63220 | #NV    | P63220 | P63220 |
| P63313 | TYB10_HUMAN  | TMSB10  | Thymosin beta-10                                                                          | migration                 | other (intracellular compartments) | P63313 | P63313 | P63313 | P63313 | P63313 | P63313 |
| P68104 | EF1A1_HUMAN  | EEF1A1  | Elongation factor 1-alpha 1 (EF-1-alpha-1)                                                | response to growth factor | extracellular exosome              | P68104 | P68104 | P68104 | P68104 | P68104 | P68104 |

|        |             |           |                                                                                                        |                          |                                    |        |        |        |        |        |        |
|--------|-------------|-----------|--------------------------------------------------------------------------------------------------------|--------------------------|------------------------------------|--------|--------|--------|--------|--------|--------|
| P68133 | ACTS_HUMAN  | ACTA1     | Actin, alpha skeletal muscle (Alpha-actin-1)                                                           | response to nutrient     | extracellular exosome              | P68133 | P68133 | P68133 | P68133 | #NV    | P68133 |
| P78324 | SHP51_HUMAN | SIRPA     | Tyrosine-protein phosphatase non-receptor type substrate 1 (SHP substrate 1)                           | response to cytokine     | integral component of membrane     | P78324 | P78324 | P78324 | P78324 | P78324 | P78324 |
| P80303 | NUCB2_HUMAN | NUCB2     | Nucleobindin-2 (DNA-binding protein NEFA)                                                              | regulation               | extracellular exosome              | P80303 | P80303 | P80303 | P80303 | P80303 | P80303 |
| P98082 | DAB2_HUMAN  | DAB2      | Disabled homolog 2 (Adaptor molecule disabled-2)                                                       | migration                | integral component of membrane     | P98082 | P98082 | #NV    | #NV    | #NV    | P98082 |
| Q02818 | NUCB1_HUMAN | NUCB1     | Nucleobindin-1 (CALNUC)                                                                                | response (other)         | extracellular exosome              | Q02818 | Q02818 | Q02818 | Q02818 | #NV    | #NV    |
| Q04656 | ATP7A_HUMAN | ATP7A     | Copper-transporting ATPase 1 (EC 7.2.2.8) (Copper pump 1)                                              | antimicrobial response   | integral component of membrane     | Q04656 | Q04656 | Q04656 | Q04656 | Q04656 | Q04656 |
| Q07000 | HLA_C_HUMAN | HLA-C     | HLA class I histocompatibility antigen, C alpha chain (HLA-C)                                          | adaptive immune response | endoplasmic reticulum              | Q07000 | Q07000 | Q07000 | Q07000 | Q07000 | Q07000 |
| Q08380 | LG3BP_HUMAN | LGALS3BP  | Galectin-3-binding protein (Basement membrane autoantigen p105)                                        | response (other)         | extracellular matrix               | Q08380 | Q08380 | Q08380 | Q08380 | Q08380 | Q08380 |
| Q08431 | MFGM_HUMAN  | MFGE8     | Lactadherin (Breast epithelial antigen BA46) (HMF8)                                                    | regulation               | extracellular matrix               | Q08431 | Q08431 | Q08431 | #NV    | Q08431 | Q08431 |
| Q09666 | AHNAK_HUMAN | AHNAK     | Neuroblast differentiation-associated protein AHNAK (Desmoyokin)                                       | regulation               | extracellular exosome              | Q09666 | Q09666 | Q09666 | Q09666 | Q09666 | Q09666 |
| Q10471 | GALT2_HUMAN | GALNT2    | Polypeptide N-acetylgalactosaminyltransferase 2 (EC 2.4.1.41)                                          | other                    | integral component of membrane     | Q10471 | Q10471 | Q10471 | Q10471 | Q10471 | Q10471 |
| Q12830 | BPTF_HUMAN  | BPTF      | Nucleosome-remodeling factor subunit BPTF (Bromodomain and PHD finger-containing transcription factor) | regulation               | extracellular exosome              | Q12830 | Q12830 | Q12830 | Q12830 | Q12830 | Q12830 |
| Q12913 | PTPRJ_HUMAN | PTPRJ     | Receptor-type tyrosine-protein phosphatase eta (Protein-tyrosine phosphatase eta)                      | migration                | integral component of membrane     | Q12913 | Q12913 | Q12913 | Q12913 | Q12913 | Q12913 |
| Q13113 | PDZ1_HUMAN  | PDZK1IP1  | PDZK1-interacting protein 1 (17 kDa membrane-associated protein)                                       | other                    | integral component of membrane     | Q13113 | Q13113 | Q13113 | #NV    | Q13113 | Q13113 |
| Q13410 | BT1A1_HUMAN | BTN1A1    | Butyrophilin subfamily 1 member A1 (BT)                                                                | adaptive immune response | integral component of membrane     | Q13410 | Q13410 | Q13410 | Q13410 | Q13410 | Q13410 |
| Q13438 | OS9_HUMAN   | OS9       | Protein OS-9 (Amplified in osteosarcoma 9)                                                             | response to stress       | endoplasmic reticulum              | Q13438 | Q13438 | Q13438 | Q13438 | Q13438 | Q13438 |
| Q14512 | FGF1_HUMAN  | FGFBP1    | Fibroblast growth factor-binding protein 1 (FGF-BP)                                                    | migration                | extracellular region/space         | Q14512 | Q14512 | Q14512 | Q14512 | Q14512 | Q14512 |
| Q14766 | LTBP1_HUMAN | LTBP1     | Latent-transforming growth factor beta-binding protein 1 (LTBP-1)                                      | regulation               | extracellular matrix               | Q14766 | Q14766 | Q14766 | Q14766 | Q14766 | Q14766 |
| Q14802 | FXDY3_HUMAN | FXDY3     | FXDY domain-containing ion transport regulator 3 (Chloride conductance inducer protein Mat-8)          | regulation               | integral component of membrane     | Q14802 | Q14802 | Q14802 | Q14802 | Q14802 | Q14802 |
| Q14839 | CHD4_HUMAN  | CHD4      | Chromodomain-helicase-DNA-binding protein 4 (CHD-4) (EC 3.6.4.12)                                      | regulation               | other (intracellular compartments) | Q14839 | Q14839 | #NV    | #NV    | Q14839 | Q14839 |
| Q15365 | PCBP1_HUMAN | PCBP1     | Poly(RC)-binding protein 1 (Alpha-CP1) (Heterogeneous nuclear ribonucleoprotein E1)                    | regulation               | extracellular exosome              | Q15365 | Q15365 | Q15365 | Q15365 | Q15365 | Q15365 |
| Q15904 | VAS1_HUMAN  | ATP6AP1   | V-type proton ATPase subunit S1 (V-ATPase subunit S1)                                                  | response (other)         | integral component of membrane     | Q15904 | Q15904 | Q15904 | Q15904 | Q15904 | Q15904 |
| Q16181 | SEPT7_HUMAN | SEPTIN7   | Septin-7 (CDC10 protein homolog)                                                                       | migration                | extracellular exosome              | Q16181 | Q16181 | Q16181 | Q16181 | Q16181 | Q16181 |
| Q16518 | RPE65_HUMAN | RPE65     | Retinoid isomerohydrolase (EC 3.1.1.64) (All-trans-retinyl-palmitate hydrolase)                        | response (other)         | endoplasmic reticulum              | Q16518 | Q16518 | Q16518 | Q16518 | Q16518 | Q16518 |
| Q16625 | OCLN_HUMAN  | OCLN      | Occludin                                                                                               | response to cytokine     | integral component of membrane     | Q16625 | Q16625 | Q16625 | Q16625 | Q16625 | Q16625 |
| Q16851 | UGPA_HUMAN  | UGP2      | UTP--glucose-1-phosphate uridylyltransferase (EC 2.7.7.9) (UDP-glucose pyrophosphorylase)              | metabolism               | extracellular exosome              | Q16851 | Q16851 | Q16851 | Q16851 | Q16851 | Q16851 |
| Q210M4 | LRC26_HUMAN | LRRC26    | Leucine-rich repeat-containing protein 26 (BK channel auxiliary gamma subunit LRRC26)                  | regulation               | integral component of membrane     | Q210M4 | Q210M4 | Q210M4 | Q210M4 | Q210M4 | Q210M4 |
| Q53GQ0 | DHB12_HUMAN | HSD17B12  | Very-long-chain 3-oxoacyl-CoA reductase (EC 1.1.1.330) (17-beta-hydroxysteroid dehydrogenase 12)       | regulation               | extracellular matrix               | Q53GQ0 | Q53GQ0 | Q53GQ0 | Q53GQ0 | Q53GQ0 | Q53GQ0 |
| Q5JWF2 | GNAS1_HUMAN | GNAS      | Guanine nucleotide-binding protein G(s) subunit alpha isoforms XLas                                    | regulation               | extracellular exosome              | Q5JWF2 | Q5JWF2 | #NV    | Q5JWF2 | Q5JWF2 | Q5JWF2 |
| Q6UX71 | PXDC2_HUMAN | PLXDC2    | Plexin domain-containing protein 2 (Tumor endothelial marker 7-related protein)                        | other                    | integral component of membrane     | Q6UX71 | Q6UX71 | Q6UX71 | Q6UX71 | Q6UX71 | Q6UX71 |
| Q6UXA7 | CF015_HUMAN | C6orf15   | Uncharacterized protein C6orf15 (Protein STG)                                                          | other                    | extracellular region/space         | Q6UXA7 | Q6UXA7 | #NV    | Q6UXA7 | Q6UXA7 | Q6UXA7 |
| Q6WN34 | CRDL2_HUMAN | CHRD12    | Chordin-like protein 2 (Breast tumor novel factor 1) (BNF-1) (Chordin-related protein 2)               | other                    | extracellular region/space         | Q6WN34 | Q6WN34 | Q6WN34 | Q6WN34 | Q6WN34 | Q6WN34 |
| Q6Z581 | WDFY4_HUMAN | WDFY4     | WD repeat- and FYVE domain-containing protein 4                                                        | other                    | other (intracellular compartments) | Q6Z581 | Q6Z581 | Q6Z581 | Q6Z581 | Q6Z581 | Q6Z581 |
| Q7Z7D3 | VTCN1_HUMAN | VTCN1     | V-set domain-containing T-cell activation inhibitor 1 (B7 homolog 4)                                   | adaptive immune response | integral component of membrane     | Q7Z7D3 | Q7Z7D3 | Q7Z7D3 | Q7Z7D3 | Q7Z7D3 | Q7Z7D3 |
| Q86X10 | RLGPB_HUMAN | RALGAPB   | Ral GTPase-activating protein subunit beta (p170)                                                      | regulation               | other (intracellular compartments) | Q86X10 | Q86X10 | Q86X10 | Q86X10 | Q86X10 | Q86X10 |
| Q86X29 | LSR_HUMAN   | LSR       | Lipolysis-stimulated lipoprotein receptor                                                              | regulation               | lipoprotein particle               | Q86X29 | Q86X29 | Q86X29 | Q86X29 | Q86X29 | Q86X29 |
| Q86Y38 | XYLT1_HUMAN | XYLT1     | Xylosyltransferase 1 (EC 2.4.2.26) (Peptide O-xylosyltransferase 1)                                    | metabolism               | integral component of membrane     | Q86Y38 | Q86Y38 | Q86Y38 | Q86Y38 | Q86Y38 | Q86Y38 |
| Q81ZA0 | K319L_HUMAN | KIAA0319L | Dyslexia-associated protein KIAA0319-like protein (Adeno-associated virus receptor) (AAVR)             | other                    | integral component of membrane     | Q81ZA0 | Q81ZA0 | Q81ZA0 | Q81ZA0 | Q81ZA0 | Q81ZA0 |
| Q81ZC6 | CORA1_HUMAN | COL27A1   | Collagen alpha-1(XXVII) chain                                                                          | other                    | extracellular matrix               | Q81ZC6 | Q81ZC6 | Q81ZC6 | Q81ZC6 | Q81ZC6 | Q81ZC6 |
| Q8N114 | SHSA5_HUMAN | SHISA5    | Protein shisa-5 (Putative NF-kappa-B-activating protein 120) (Scotin)                                  | response (other)         | integral component of membrane     | Q8N114 | Q8N114 | #NV    | #NV    | Q8N114 | Q8N114 |
| Q8N387 | MUC15_HUMAN | MUC15     | Mucin-15 (MUC-15)                                                                                      | other                    | integral component of membrane     | Q8N387 | Q8N387 | Q8N387 | Q8N387 | Q8N387 | Q8N387 |
| Q8N474 | SFRP1_HUMAN | SFRP1     | Secreted frizzled-related protein 1 (FRP-1) (sFRP-1)                                                   | response to hypoxia      | extracellular matrix               | Q8N474 | Q8N474 | Q8N474 | Q8N474 | Q8N474 | Q8N474 |
| Q8N7A1 | KLDC1_HUMAN | KLHDC1    | Kelch domain-containing protein 1                                                                      | other                    | other (intracellular compartments) | Q8N7A1 | Q8N7A1 | Q8N7A1 | Q8N7A1 | Q8N7A1 | Q8N7A1 |
| Q8N9U0 | TAC2N_HUMAN | TC2N      | Tandem C2 domains nuclear protein (Membrane targeting tandem C2 domain-containing protein 1)           | other                    | other (intracellular compartments) | Q8N9U0 | Q8N9U0 | Q8N9U0 | Q8N9U0 | Q8N9U0 | Q8N9U0 |
| Q8NBJ4 | GOLM1_HUMAN | GOLM1     | Golgi membrane protein 1 (Golgi membrane protein GP73) (Golgi phosphoprotein 2)                        | regulation               | extracellular region/space         | Q8NBJ4 | Q8NBJ4 | Q8NBJ4 | Q8NBJ4 | Q8NBJ4 | Q8NBJ4 |
| Q8NES3 | LFNG_HUMAN  | LFNG      | Beta-1,3-N-acetylglucosaminyltransferase lunatic fringe (EC 2.4.1.222)                                 | regulation               | integral component of membrane     | Q8NES3 | Q8NES3 | Q8NES3 | Q8NES3 | Q8NES3 | Q8NES3 |
| Q8NFU4 | FDSCP_HUMAN | FDSCP     | Follicular dendritic cell secreted peptide (FDC secreted protein) (FDC-SP)                             | other                    | extracellular region/space         | Q8NFU4 | Q8NFU4 | Q8NFU4 | Q8NFU4 | Q8NFU4 | Q8NFU4 |
| Q8NI22 | MCFD2_HUMAN | MCFD2     | Multiple coagulation factor deficiency protein 2 (Neural stem cell-derived neuronal survival protein)  | transport                | endoplasmic reticulum              | Q8NI22 | Q8NI22 | Q8NI22 | Q8NI22 | Q8NI22 | Q8NI22 |
| Q8WUH6 | TM263_HUMAN | TMEM263   | Transmembrane protein 263                                                                              | other                    | integral component of membrane     | Q8WUH6 | Q8WUH6 | Q8WUH6 | Q8WUH6 | Q8WUH6 | Q8WUH6 |
| Q92673 | SORL1_HUMAN | SORL1     | Sortilin-related receptor (Low-density lipoprotein receptor relative with 11 ligand-binding repeats)   | migration                | integral component of membrane     | Q92673 | Q92673 | Q92673 | Q92673 | Q92673 | Q92673 |
| Q92896 | GSLG1_HUMAN | GLG1      | Golgi apparatus protein 1 (CFR-1) (Cysteine-rich fibroblast growth factor receptor)                    | migration                | extracellular matrix               | Q92896 | Q92896 | Q92896 | Q92896 | Q92896 | Q92896 |
| P10321 | HLAC_HUMAN  | HLA-C     | HLA class I histocompatibility antigen, C alpha chain (HLA-C)                                          | adaptive immune response | extracellular exosome              | Q95604 | Q95604 | Q95604 | Q95604 | Q95604 | Q95604 |
| Q969T9 | WBP2_HUMAN  | WBP2      | WW domain-binding protein 2 (WBP-2)                                                                    | response to hormone      | other (intracellular compartments) | Q969T9 | Q969T9 | Q969T9 | Q969T9 | Q969T9 | Q969T9 |
| Q96A22 | CK052_HUMAN | C11orf52  | Uncharacterized protein C11orf52                                                                       | other                    | extracellular exosome              | Q96A22 | Q96A22 | Q96A22 | Q96A22 | Q96A22 | Q96A22 |
| Q96A33 | CCD47_HUMAN | CCDC47    | Coiled-coil domain-containing protein 47 (Calumin)                                                     | response (other)         | integral component of membrane     | Q96A33 | Q96A33 | Q96A33 | Q96A33 | Q96A33 | Q96A33 |
| Q96AD5 | PLPL2_HUMAN | PNPLA2    | Patatin-like phospholipase domain-containing protein 2 (EC 3.1.1.3)                                    | regulation               | lipid droplet                      | Q96AD5 | Q96AD5 | Q96AD5 | Q96AD5 | Q96AD5 | Q96AD5 |
| Q96D31 | CRCM1_HUMAN | ORAI1     | Calcium release-activated calcium channel protein 1 (Protein orai-1)                                   | adaptive immune response | integral component of membrane     | Q96D31 | Q96D31 | Q96D31 | Q96D31 | Q96D31 | Q96D31 |
| Q96IU4 | ABHEB_HUMAN | ABHD14B   | Protein ABHD14B (EC 3.-.-.-) (Alpha/beta hydrolase domain-containing protein 14B)                      | regulation               | extracellular exosome              | Q96IU4 | #NV    | Q96IU4 | Q96IU4 | Q96IU4 | Q96IU4 |
| Q96IY4 | CBPB2_HUMAN | CPB2      | Carboxypeptidase B2 (EC 3.4.17.20) (Carboxypeptidase U)                                                | response to nutrient     | extracellular region/space         | Q96IY4 | Q96IY4 | #NV    | #NV    | #NV    | Q96IY4 |

|        |             |          |                                                                                                                              |                          |                                    |        |        |        |        |        |        |
|--------|-------------|----------|------------------------------------------------------------------------------------------------------------------------------|--------------------------|------------------------------------|--------|--------|--------|--------|--------|--------|
| Q96JH7 | VCIP1_HUMAN | VCIP1    | Deubiquitinating protein VCIP135 (EC 3.4.19.12)                                                                              | other                    | endoplasmic reticulum              | Q96JH7 | Q96JH7 | Q96JH7 | Q96JH7 | Q96JH7 | Q96JH7 |
| Q96S86 | HPLN3_HUMAN | HAPLN3   | Hyaluronan and proteoglycan link protein 3                                                                                   | other                    | extracellular matrix               | Q96S86 | Q96S86 | Q96S86 | Q96S86 | Q96S86 | Q96S86 |
| Q96S97 | MYADM_HUMAN | MYADM    | Myeloid-associated differentiation marker (Protein SB135)                                                                    | migration                | integral component of membrane     | Q96S97 | Q96S97 | Q96S97 | Q96S97 | Q96S97 | Q96S97 |
| Q96SI9 | STRBP_HUMAN | STRBP    | Spermatid perinuclear RNA-binding protein                                                                                    | other                    | other (intracellular compartments) | Q96SI9 | Q96SI9 | Q96SI9 | #NV    | Q96SI9 | Q96SI9 |
| Q96T51 | RUFY1_HUMAN | RUFY1    | RUN and FYVE domain-containing protein 1 (FYVE-finger protein EIP1)                                                          | transport                | other (intracellular compartments) | Q96T51 | #NV    | #NV    | Q96T51 | #NV    | Q96T51 |
| Q96TA1 | NIBA2_HUMAN | NIBAN2   | Protein Niban 2 (Meg-3) (Melanoma invasion by ERK)                                                                           | regulation               | extracellular exosome              | Q96TA1 | Q96TA1 | #NV    | #NV    | Q96TA1 | Q96TA1 |
| Q99523 | SORT_HUMAN  | SORT1    | Sortilin (100 kDa NT receptor) (Glycoprotein 95)                                                                             | response (other)         | integral component of membrane     | Q99523 | Q99523 | Q99523 | Q99523 | Q99523 | Q99523 |
| Q99541 | PLIN2_HUMAN | PLIN2    | Perilipin-2 (Adipophilin)                                                                                                    | response (other)         | lipid droplet                      | Q99541 | Q99541 | Q99541 | Q99541 | Q99541 | Q99541 |
| Q9BW60 | ELOV1_HUMAN | ELOVL1   | Elongation of very long chain fatty acids protein 1 (EC 2.3.1.199)                                                           | metabolism               | integral component of membrane     | Q9BW60 | Q9BW60 | #NV    | #NV    | #NV    | Q9BW60 |
| Q9GZN4 | BSSP4_HUMAN | PRSS22   | Brain-specific serine protease 4 (BSSP-4) (EC 3.4.21.-) (Serine protease 22)                                                 | other                    | extracellular region/space         | Q9GZN4 | Q9GZN4 | Q9GZN4 | Q9GZN4 | Q9GZN4 | Q9GZN4 |
| Q9GZU8 | PIP30_HUMAN | PSME3IP1 | PSME3-interacting protein (NEFA-interacting nuclear protein NIP30)                                                           | regulation               | other (intracellular compartments) | Q9GZU8 | Q9GZU8 | Q9GZU8 | Q9GZU8 | Q9GZU8 | Q9GZU8 |
| Q9H173 | SIL1_HUMAN  | SIL1     | Nucleotide exchange factor SIL1 (BiP-associated protein) (BAP)                                                               | transport                | endoplasmic reticulum              | Q9H173 | Q9H173 | Q9H173 | Q9H173 | Q9H173 | Q9H173 |
| Q9H3M7 | TXNIP_HUMAN | TXNIP    | Thioredoxin-interacting protein (Thioredoxin-binding protein 2)                                                              | response (other)         | other (intracellular compartments) | Q9H3M7 | Q9H3M7 | Q9H3M7 | Q9H3M7 | Q9H3M7 | Q9H3M7 |
| Q9H3Z4 | DNJC5_HUMAN | DNAJC5   | DnaJ homolog subfamily C member 5 (Ceroid-lipofuscinosis neuronal protein 4)                                                 | regulation               | integral component of membrane     | Q9H3Z4 | Q9H3Z4 | Q9H3Z4 | Q9H3Z4 | Q9H3Z4 | Q9H3Z4 |
| Q9HB40 | RISC_HUMAN  | SCPEP1   | Retinoid-inducible serine carboxypeptidase (EC 3.4.16.-) (Serine carboxypeptidase 1)                                         | regulation               | extracellular exosome              | Q9HB40 | Q9HB40 | Q9HB40 | Q9HB40 | Q9HB40 | Q9HB40 |
| Q9NP72 | RAB18_HUMAN | RAB18    | Ras-related protein Rab-18                                                                                                   | transport                | integral component of membrane     | Q9NP72 | Q9NP72 | Q9NP72 | Q9NP72 | Q9NP72 | Q9NP72 |
| Q9NQC3 | RTN4_HUMAN  | RTN4     | Reticulon-4 (Foocen) (Neurite outgrowth inhibitor)                                                                           | response to hypoxia      | integral component of membrane     | Q9NQC3 | Q9NQC3 | Q9NQC3 | Q9NQC3 | Q9NQC3 | Q9NQC3 |
| Q9NQR4 | NIT2_HUMAN  | NIT2     | Omega-amidase NIT2 (EC 3.5.1.3) (Nitrilase homolog 2)                                                                        | metabolism               | extracellular exosome              | Q9NQR4 | Q9NQR4 | Q9NQR4 | Q9NQR4 | Q9NQR4 | Q9NQR4 |
| Q9NRJ3 | CCL28_HUMAN | CCL28    | C-C motif chemokine 28 (Mucosae-associated epithelial chemokine) (MEC) (Protein CCK1)                                        | antimicrobial response   | extracellular region/space         | Q9NRJ3 | Q9NRJ3 | Q9NRJ3 | #NV    | #NV    | Q9NRJ3 |
| Q9NRR3 | C42S2_HUMAN | CDC42SE2 | CDC42 small effector protein 2 (Small effector of CDC42 protein 2)                                                           | regulation               | other (intracellular compartments) | Q9NRR3 | Q9NRR3 | Q9NRR3 | Q9NRR3 | Q9NRR3 | Q9NRR3 |
| Q9NS69 | TOM22_HUMAN | TOMM22   | Mitochondrial import receptor subunit TOM22 homolog (hTom22) (1C9-2)                                                         | regulation               | integral component of membrane     | Q9NS69 | Q9NS69 | Q9NS69 | Q9NS69 | Q9NS69 | Q9NS69 |
| Q9NV23 | SAST_HUMAN  | OLAH     | S-acyl fatty acid synthase thioesterase, medium chain (EC 3.1.2.14)                                                          | other                    | other (intracellular compartments) | Q9NV23 | Q9NV23 | Q9NV23 | #NV    | #NV    | #NV    |
| Q9NZH0 | GPC5B_HUMAN | GPC5B    | G-protein coupled receptor family C group 5 member B (A-69G12.1)                                                             | response (other)         | integral component of membrane     | Q9NZH0 | Q9NZH0 | Q9NZH0 | Q9NZH0 | Q9NZH0 | Q9NZH0 |
| Q9P2B7 | CFA97_HUMAN | CFAP97   | Cilia- and flagella-associated protein 97                                                                                    | other                    | other (intracellular compartments) | Q9P2B7 | Q9P2B7 | Q9P2B7 | Q9P2B7 | Q9P2B7 | Q9P2B7 |
| Q9UDW1 | QCR9_HUMAN  | UQCR10   | Cytochrome b-c1 complex subunit 9 (Complex III subunit 9)                                                                    | transport                | other (intracellular compartments) | Q9UDW1 | Q9UDW1 | Q9UDW1 | Q9UDW1 | Q9UDW1 | Q9UDW1 |
| Q9UKW6 | ELF5_HUMAN  | ELF5     | ETS-related transcription factor Elf-5 (E74-like factor 5) (Epithelium-restricted ESE-1-related Ets factor)                  | regulation               | other (intracellular compartments) | Q9UKW6 | #NV    | Q9UKW6 | Q9UKW6 | Q9UKW6 | Q9UKW6 |
| Q9ULZ1 | APEL_HUMAN  | APLN     | Apelin (APJ endogenous ligand) [Cleaved into: Apelin-36; Apelin-31; Apelin-28; Apelin-13]                                    | adaptive immune response | extracellular region/space         | Q9ULZ1 | Q9ULZ1 | #NV    | Q9ULZ1 | Q9ULZ1 | Q9ULZ1 |
| Q9UNQ0 | ABCG2_HUMAN | ABCG2    | Broad substrate specificity ATP-binding cassette transporter ABCG2 (EC 7.6.2.2) (ATP-binding cassette sub-family G member 2) | transport                | integral component of membrane     | Q9UNQ0 | Q9UNQ0 | Q9UNQ0 | Q9UNQ0 | Q9UNQ0 | Q9UNQ0 |
| Q9Y2K3 | MYH15_HUMAN | MYH15    | Myosin-15 (Myosin heavy chain 15)                                                                                            | other                    | other (intracellular compartments) | Q9Y2K3 | Q9Y2K3 | #NV    | Q9Y2K3 | Q9Y2K3 | Q9Y2K3 |
| Q9Y342 | PLLP_HUMAN  | PLLP     | Plasmolipin (Plasma membrane proteolipid)                                                                                    | response to stress       | integral component of membrane     | Q9Y342 | Q9Y342 | Q9Y342 | #NV    | Q9Y342 | Q9Y342 |
| Q9Y653 | AGRG1_HUMAN | ADGRG1   | Adhesion G-protein coupled receptor G1 (G-protein coupled receptor 56)                                                       | migration                | integral component of membrane     | Q9Y653 | Q9Y653 | Q9Y653 | #NV    | Q9Y653 | #NV    |
| Q9Y679 | AUP1_HUMAN  | AUP1     | Ancient ubiquitous protein 1                                                                                                 | transport                | extracellular exosome              | Q9Y679 | Q9Y679 | Q9Y679 | Q9Y679 | Q9Y679 | Q9Y679 |
